# Supplementary material for: Cu(i)-Catalyzed asymmetric exo-selective synthesis of substituted pyrrolidines via a 1,3-dipolar cycloaddition reaction
Source: Royal Society of Chemistry journal article supplement (doi:10.1039/d1ob00494h), 2021-01-01
Supplement: d1ob00494h2.pdf [file d1ob00494h2.pdf]

# Supporting Information

## Cu(I)-catalyzed asymmetric *exo*-selective synthesis of substituted pyrrolidines via 1,3-dipolar cycloaddition reaction

Rayhan G. Biswas<sup>a</sup>, Sumit K. Ray<sup>b</sup>, Vinod K. Kannaujiya<sup>a</sup>, Rajshekhar A. Unhale<sup>a</sup> and Vinod K. Singh<sup>c,\*</sup>

<sup>a</sup>Department of Chemistry, Indian Institute of Science Education and Research Bhopal, Bhopal-462066, India.

<sup>b</sup>Department of Chemistry, Kharagpur College, Paschim Medinipur, West Bengal 721305, India

<sup>c</sup>Department of Chemistry, Indian Institute of Technology, Kanpur-208016, India.

Fax: +91-512-2597436; E-mail: vinodks@iitk.ac.in

### Table of contents:

|                                                                                                     |         |
|-----------------------------------------------------------------------------------------------------|---------|
| Materials and methods                                                                               | S2      |
| General procedure and characterization data of $\alpha,\beta$ -unsaturated pyrazolamide <b>2a-l</b> | S3-S7   |
| General procedure of alkyl <i>N</i> -benzylideneglycinate <b>3a-m</b>                               | S8      |
| General procedure and characterization data of (3+2) cycloaddition products <b>4</b>                | S8-S20  |
| General procedure and characterization data of <b>5</b>                                             | S21     |
| General procedure and characterization data of <b>8</b>                                             | S21-S22 |
| References                                                                                          | S22     |
| X-ray crystallographic figures and data of <b>4ba</b>                                               | S23-S24 |
| Spectral graphics and hplc traces                                                                   | S25-S91 |

## Materials and Methods:

All reactions were carried out in oven dried glassware with magnetic stirring. All solvents were purified and dried according to standard methods prior to use. Starting materials  $\alpha,\beta$ -unsaturated pyrazolamide **2a-l** and azomethine ylides **3b-m** were prepared by reported methods.<sup>1,2</sup> Catalysts **L1-L7** are commercially available. <sup>1</sup>H spectra were recorded on 400 MHz or 500 MHz in CDCl<sub>3</sub> and <sup>13</sup>C NMR spectra were recorded on 100 or 125 MHz in CDCl<sub>3</sub> using TMS or residual solvent signals as internal standard. Data for <sup>1</sup>H NMR are recorded as follows: chemical shift ( $\delta$ , ppm), multiplicity (s = singlet, d = doublet, t = triplet, q = quartet, m = multiplet or unresolved, coupling constant (s) in Hz, integration). Data for <sup>13</sup>C NMR are reported in terms of chemical shift ( $\delta$ , ppm). High resolution mass spectra (HRMS) were obtained by the ESI (Q-TOF) ionization sources. IR spectra were measured with PerkinElmer FT/IR Vector 22 spectrometer. Optical rotations were measured on a commercial automatic polarimeter and reported as follows:  $[\alpha]_D^{25}$  (c = g/100 mL, solvent). Routine monitoring of reactions we reformed using precoated silica gel TLC plates from E-Merck. All the chromatographic separations were carried out by using silica gel (Acme's, 100-200 mesh). Melting points were recorded by using a melting point apparatus and are uncorrected. The enantioselectivity was determined by chiral HPLC analysis using chiralpak AD-H, OD-H, IA, IC and ID column with a 200 UV-detector by using *iso*-propanol and *n*-hexane as eluents at 25 °C.

### General procedure and characterization data of $\alpha,\beta$ -unsaturated pyrazolamide 2a-l:

$\alpha,\beta$ -unsaturated pyrazolamides **2a-l** were synthesized according to modified literature procedure.<sup>1</sup>

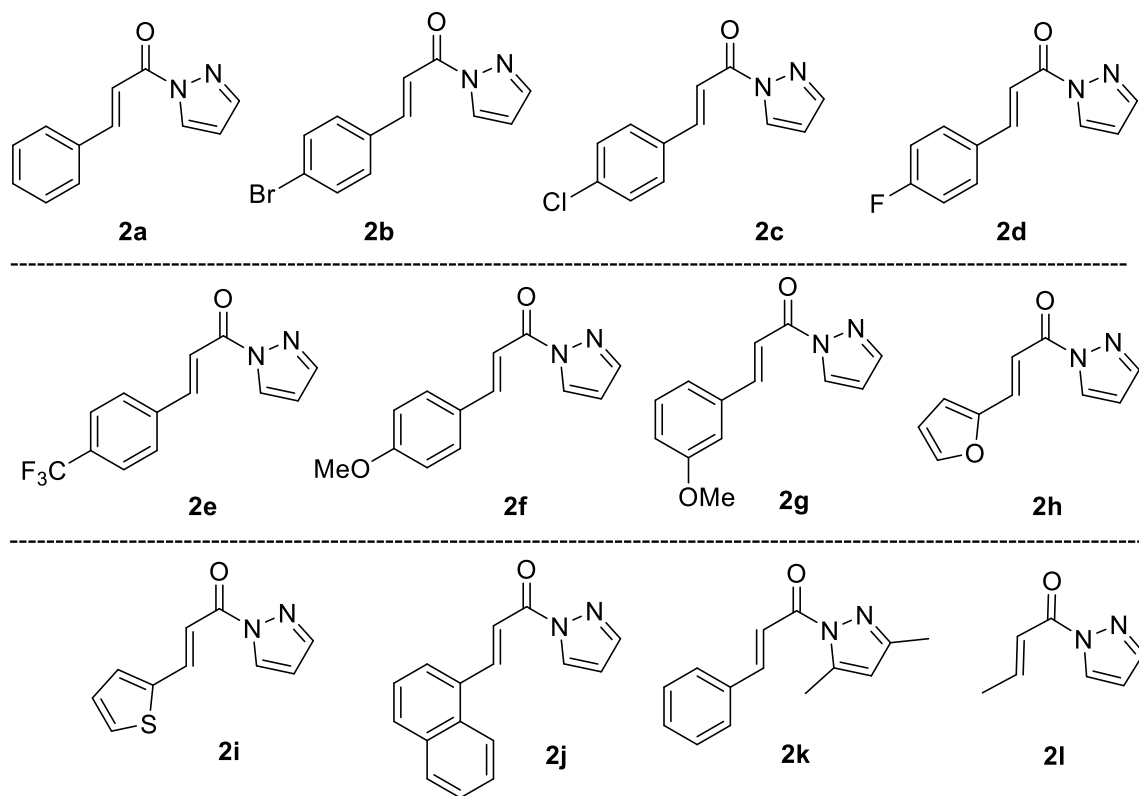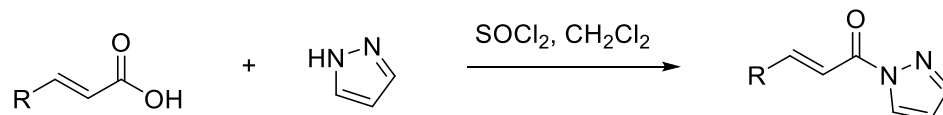

To a solution of pyrazole (5.0 g, 73.5 mmol) in  $\text{CH}_2\text{Cl}_2$  (150 mL) was added  $\text{SOCl}_2$  (8.0 mL, 110 mmol) at  $0^\circ\text{C}$ , then the reaction mixture was brought to room temperature and stirred at room temperature for 1 h. *Trans*-Cinnamic acid (24.5 mmol) was added in one portion. The mixture was further stirred for additional 3 hours. The resulting solution was diluted with  $\text{CH}_2\text{Cl}_2$  (150 mL), washed with aqueous NaOH solution (0.5 M, 3 x 100 mL), water (3 x 100 mL), then dried over  $\text{Na}_2\text{SO}_4$ . The solvent was removed under reduced pressure. The crude product was purified by flash chromatography on silica gel (*n*-hexane/ $\text{CH}_2\text{Cl}_2$ ) to afford product **2a-l**.

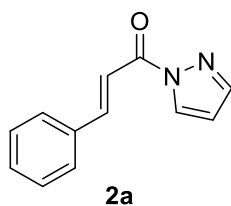

**(E)-3-phenyl-1-(1H-pyrazol-1-yl)prop-2-en-1-one (2a)**: White solid, 6.01 g, 90% yield. MP: 42–45  $^\circ\text{C}$ .  $^1\text{H NMR}$  (500 MHz, Chloroform-*d*)  $\delta$  8.42 (dd,  $J = 2.9, 0.7$  Hz, 1H), 8.06 (d,  $J = 16.0$  Hz, 1H), 7.94

(d,  $J = 16.0$  Hz, 1H), 7.81 (d,  $J = 1.4$  Hz, 1H), 7.78 – 7.66 (m, 2H), 7.50 – 7.37 (m, 3H), 6.52 (dd,  $J = 2.8, 1.5$  Hz, 1H).  $^{13}\text{C}$  NMR (125 MHz, Chloroform- $d$ )  $\delta$  163.63, 147.88, 143.86, 134.44, 131.06, 128.98, 128.83, 128.74, 115.74, 109.86. IR (film)  $\nu_{\text{max}}$  3621, 3132, 1954, 1705, 1623, 1385, 1351, 935, 767  $\text{cm}^{-1}$ ; HRMS (ES $^{+}$ ): Exact mass calcd for  $\text{C}_{12}\text{H}_{10}\text{N}_2\text{O}$   $[\text{M}+\text{Na}]^{+}$ : 221.0685. Found: 221.0700.

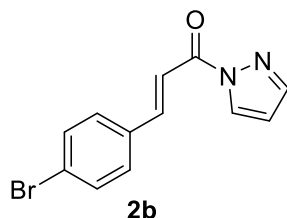

**(E)-3-(4-bromophenyl)-1-(1H-pyrazol-1-yl)prop-2-en-1-one (2b):** White solid, 2.07 g, 75% yield. MP: 104–107 °C.  $^1\text{H}$  NMR (400 MHz, Chloroform- $d$ )  $\delta$  8.36 (d,  $J = 2.8$  Hz, 1H), 8.01 – 7.78 (m, 2H), 7.75 (d,  $J = 1.5$  Hz, 1H), 7.52 (s, 4H), 6.48 (dd,  $J = 2.8, 1.5$  Hz, 1H).  $^{13}\text{C}$  NMR (100 MHz, Chloroform- $d$ )  $\delta$  163.35, 146.28, 143.94, 133.32, 132.24, 130.11, 128.74, 125.44, 116.42, 110.00. IR (film)  $\nu_{\text{max}}$  3381, 2106, 1907, 1693, 1623, 1485, 1386, 1349, 819, 762  $\text{cm}^{-1}$ ; HRMS (ES $^{+}$ ): Exact mass calcd for  $\text{C}_{12}\text{H}_9\text{BrN}_2\text{O}$   $[\text{M}+\text{Na}]^{+}$ : 298.9790. Found: 298.9795.

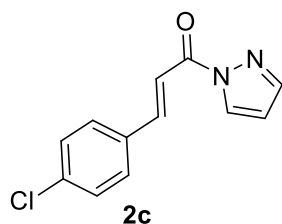

**(E)-3-(4-chlorophenyl)-1-(1H-pyrazol-1-yl)prop-2-en-1-one (2c):** White solid, 4.46 g, 96% yield. MP: 104–107 °C.  $^1\text{H}$  NMR (400 MHz, Chloroform- $d$ )  $\delta$  8.36 (d,  $J = 2.8$  Hz, 1H), 8.01 – 7.80 (m, 2H), 7.76 (d,  $J = 1.4$  Hz, 1H), 7.65 – 7.57 (m, 2H), 7.43 – 7.33 (m, 2H), 6.48 (dd,  $J = 2.8, 1.5$  Hz, 1H).  $^{13}\text{C}$  NMR (100 MHz, Chloroform- $d$ )  $\delta$  163.36, 146.21, 143.93, 137.00, 132.91, 129.93, 129.27, 128.73, 116.31, 109.97, 99.99. IR (film)  $\nu_{\text{max}}$  3138, 1695, 1623, 1386, 1349, 823, 763  $\text{cm}^{-1}$ ; HRMS (ES $^{+}$ ): Exact mass calcd for  $\text{C}_{12}\text{H}_9\text{ClN}_2\text{O}$   $[\text{M}+\text{Na}]^{+}$ : 255.0296. Found: 255.0315.

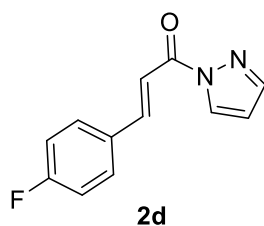

**(E)-3-(4-fluorophenyl)-1-(1H-pyrazol-1-yl)prop-2-en-1-one (2d):** White solid, 3.30 g, 85% yield. MP: 117–120 °C.  $^1\text{H}$  NMR (500 MHz, Chloroform- $d$ )  $\delta$  8.40 (d,  $J = 2.7$  Hz, 1H), 7.99 (d,  $J = 16.0$  Hz, 1H), 7.84 (d,  $J = 16.0$  Hz, 1H), 7.79 (d,  $J = 1.5$  Hz, 1H), 7.73 – 7.64 (m, 2H), 7.17 – 7.07 (m, 2H), 6.51

(dd,  $J = 2.9, 1.5$  Hz, 1H).  $^{13}\text{C}$  NMR (125 MHz, Chloroform- $d$ )  $\delta$  165.35, 163.45, 163.34, 146.40, 143.86, 130.81, 130.74, 116.25, 116.08, 115.49, 109.89.  $^{19}\text{F}$  NMR (470 MHz, Chloroform- $d$ )  $\delta$  -108.13. IR (film)  $\nu_{\text{max}}$  3428, 2361, 1699, 1626, 1387, 828, 745  $\text{cm}^{-1}$ ; HRMS (ES+): Exact mass calcd for  $\text{C}_{12}\text{H}_9\text{FN}_2\text{O}$   $[\text{M}+\text{Na}]^+$ : 239.0591. Found: 239.0583.

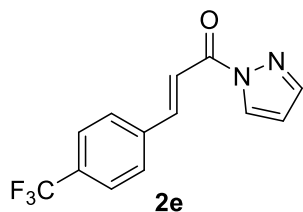

**(E)-1-(1H-pyrazol-1-yl)-3-(4-(trifluoromethyl)phenyl)prop-2-en-1-one (2e):** White solid, 0.36 g, 55% yield. MP: 90-93  $^{\circ}\text{C}$ .  $^1\text{H}$  NMR (400 MHz, Chloroform- $d$ )  $\delta$  8.36 (d,  $J = 2.7$  Hz, 1H), 7.97 (d,  $J = 2.8$  Hz, 2H), 7.75 (d,  $J = 8.9$  Hz, 3H), 7.65 (d,  $J = 8.1$  Hz, 2H), 6.52 – 6.43 (m, 1H).  $^{13}\text{C}$  NMR (125 MHz, Chloroform- $d$ )  $\delta$  163.07, 145.57, 144.09, 137.69, 132.43, 132.17, 128.79, 125.90, 118.35, 110.16.  $^{19}\text{F}$  NMR (470 MHz, Chloroform- $d$ )  $\delta$  -62.92. IR (film)  $\nu_{\text{max}}$  3361, 2112, 1910, 1697, 1622, 1430, 1355, 801, 749  $\text{cm}^{-1}$ ; HRMS (ES+): Exact mass calcd for  $\text{C}_{13}\text{H}_9\text{F}_3\text{N}_2\text{O}$   $[\text{M}+\text{Na}]^+$ : 289.0559. Found: 289.0568.

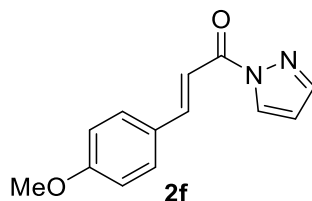

**(E)-3-(4-methoxyphenyl)-1-(1H-pyrazol-1-yl)prop-2-en-1-one (2f):** White solid, 5.76 g, 90% yield. MP: 79-82  $^{\circ}\text{C}$ .  $^1\text{H}$  NMR (500 MHz, Chloroform- $d$ )  $\delta$  8.42 (dd,  $J = 2.8, 0.7$  Hz, 1H), 8.02 (d,  $J = 15.9$  Hz, 1H), 7.82 – 7.78 (m, 2H), 7.71 – 7.67 (m, 2H), 6.99 – 6.93 (m, 2H), 6.51 (dd,  $J = 2.8, 1.5$  Hz, 1H), 3.89 (s, 3H).  $^{13}\text{C}$  NMR (125 MHz, Chloroform- $d$ )  $\delta$  163.88, 162.09, 147.74, 143.66, 130.71, 128.69, 127.30, 114.43, 113.02, 109.62, 55.45. IR (film)  $\nu_{\text{max}}$  3425, 2563, 1701, 1602, 1513, 1259, 826, 765  $\text{cm}^{-1}$ ; HRMS (ES+): Exact mass calcd for  $\text{C}_{13}\text{H}_{12}\text{N}_2\text{O}_2$   $[\text{M}+\text{Na}]^+$ : 251.0791. Found: 251.0810.

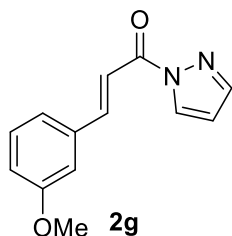

**(E)-3-(3-methoxyphenyl)-1-(1H-pyrazol-1-yl)prop-2-en-1-one (2g):** White solid, 4.7 g, 73% yield. MP: 62-65  $^{\circ}\text{C}$ .  $^1\text{H}$  NMR (500 MHz, Chloroform- $d$ )  $\delta$  8.42 (dd,  $J = 2.8, 0.7$  Hz, 1H), 8.03 (d,  $J = 16.0$  Hz, 1H), 7.91 (d,  $J = 16.0$  Hz, 1H), 7.84 – 7.76 (m, 1H), 7.37 (t,  $J = 7.9$  Hz, 1H), 7.31 (dt,  $J = 7.6, 1.3$

Hz, 1H), 7.23 (dd,  $J = 2.6, 1.7$  Hz, 1H), 7.02 (ddd,  $J = 8.1, 2.6, 1.1$  Hz, 1H), 6.53 (dd,  $J = 2.9, 1.5$  Hz, 1H), 3.89 (s, 3H).  $^{13}\text{C}$  NMR (125 MHz, Chloroform- $d$ )  $\delta$  163.60, 159.97, 147.86, 143.87, 135.76, 129.96, 128.76, 121.66, 117.17, 115.95, 113.37, 109.88, 55.41. IR (film)  $\nu_{\text{max}}$  3424, 2085, 1705, 1622, 1384, 774  $\text{cm}^{-1}$ ; HRMS (ES+): Exact mass calcd for  $\text{C}_{13}\text{H}_{12}\text{N}_2\text{O}_2$   $[\text{M}+\text{Na}]^+$ : 251.0791. Found: 251.0787.

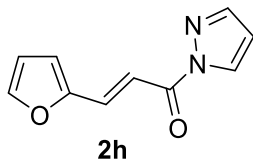

**(E)-3-(furan-2-yl)-1-(1H-pyrazol-1-yl)prop-2-en-1-one (2h):** White solid, 1.63 g, 87% yield. MP: 67-70 °C.  $^1\text{H}$  NMR (400 MHz, Chloroform- $d$ )  $\delta$  8.32 (d,  $J = 2.8$  Hz, 1H), 7.72 (d,  $J = 6.3$  Hz, 3H), 7.50 (d,  $J = 1.7$  Hz, 1H), 6.73 (d,  $J = 3.4$  Hz, 1H), 6.45 (ddd,  $J = 11.9, 3.2, 1.7$  Hz, 2H).  $^{13}\text{C}$  NMR (125 MHz, Chloroform- $d$ )  $\delta$  163.64, 151.38, 145.60, 143.78, 133.38, 128.56, 116.69, 113.33, 112.69, 109.75. IR (film)  $\nu_{\text{max}}$  3418, 3174, 2095, 1761, 1622, 1348, 759, 593  $\text{cm}^{-1}$ ; HRMS (ES+): Exact mass calcd for  $\text{C}_{10}\text{H}_8\text{N}_2\text{O}_2$   $[\text{M}+\text{Na}]^+$ : 211.0478. Found: 211.0495.

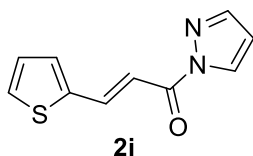

**(E)-1-(1H-pyrazol-1-yl)-3-(thiophen-2-yl)prop-2-en-1-one (2i):** White solid, 1.41 g, 69% yield. MP: 66-69 °C.  $^1\text{H}$  NMR (400 MHz, Chloroform- $d$ )  $\delta$  8.34 (d,  $J = 2.8$  Hz, 1H), 8.10 (dd,  $J = 15.5, 3.1$  Hz, 1H), 7.75 (d,  $J = 2.5$  Hz, 1H), 7.65 (dd,  $J = 15.6, 2.6$  Hz, 1H), 7.41 (dt,  $J = 22.7, 4.5$  Hz, 2H), 7.13 – 7.02 (m, 1H), 6.52 – 6.40 (m, 1H).  $^{13}\text{C}$  NMR (100 MHz, Chloroform- $d$ )  $\delta$  163.50, 143.82, 140.04, 139.94, 132.50, 129.95, 128.67, 128.33, 114.28, 109.80. IR (film)  $\nu_{\text{max}}$  3428, 3148, 2117, 1699, 1609, 1385, 1201, 710  $\text{cm}^{-1}$ ; HRMS (ES+): Exact mass calcd for  $\text{C}_{10}\text{H}_8\text{N}_2\text{OS}$   $[\text{M}+\text{Na}]^+$ : 227.0250. Found: 227.0273.

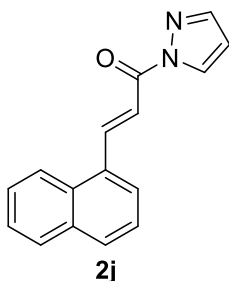

**(E)-3-(naphthalen-1-yl)-1-(1H-pyrazol-1-yl)prop-2-en-1-one (2j):** White solid, 1.8 g, 72% yield. MP: 71-74 °C.  $^1\text{H}$  NMR (500 MHz, Chloroform- $d$ )  $\delta$  8.93 (d,  $J = 15.7$  Hz, 1H), 8.47 (dd,  $J = 2.9, 0.7$  Hz, 1H), 8.34 (dd,  $J = 8.5, 1.1$  Hz, 1H), 8.10 – 8.05 (m, 1H), 8.05 – 8.03 (m, 1H), 7.98 (d,  $J = 8.1$  Hz, 1H), 7.95 – 7.91 (m, 1H), 7.83 (dd,  $J = 1.5, 0.7$  Hz, 1H), 7.65 (ddd,  $J = 8.4, 6.8, 1.4$  Hz, 1H), 7.61 –

7.53 (m, 2H), 6.55 (dd,  $J = 2.8, 1.5$  Hz, 1H).  $^{13}\text{C}$  NMR (125 MHz, Chloroform- $d$ )  $\delta$  163.54, 144.53, 143.94, 133.75, 131.69, 131.56, 131.40, 128.83, 128.80, 127.15, 126.33, 125.81, 125.47, 123.29, 118.04, 109.92. IR (film)  $\nu_{\text{max}}$  3404, 3055, 1704, 1616, 1416, 1385, 1352, 768  $\text{cm}^{-1}$ ; HRMS (ES+): Exact mass calcd for  $\text{C}_{16}\text{H}_{12}\text{N}_2\text{O}$   $[\text{M}+\text{Na}]^+$ : 271.0842. Found: 271.0863.

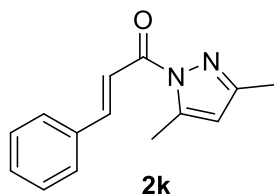

**(E)-1-(3,5-dimethyl-1H-pyrazol-1-yl)-3-phenylprop-2-en-1-one (2k)** White solid, 3.8 g, 70% yield. MP: 53-56 °C.  $^1\text{H}$  NMR (400 MHz, Chloroform- $d$ )  $\delta$  8.05 – 7.86 (m, 2H), 7.77 – 7.61 (m, 2H), 7.44 (q,  $J = 3.2$  Hz, 3H), 6.04 (s, 1H), 2.65 (s, 3H), 2.32 (s, 3H).  $^{13}\text{C}$  NMR (100 MHz, Chloroform- $d$ )  $\delta$  165.5, 151.9, 146.1, 144.4, 134.8, 130.6, 128.9, 128.7, 118.0, 111.4, 14.7, 13.9. IR (film)  $\nu_{\text{max}}$  3622, 3135, 1952, 1700, 1621, 1389, 1348, 932, 765  $\text{cm}^{-1}$ ; HRMS (ES+): Exact mass calcd for  $\text{C}_{14}\text{H}_{14}\text{N}_2\text{O}$   $[\text{M}+\text{Na}]^+$ : 249.0998. Found: 249.1026.

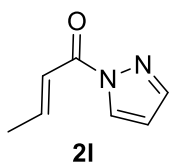

**(E)-1-(1H-pyrazol-1-yl)but-2-en-1-one (3m)**: Yellowish oil, 2.68 g, 68% yield.  $R_f = 0.70$  (10% EtOAc in hexanes).  $^1\text{H}$  NMR (500 MHz, Chloroform- $d$ )  $\delta$  8.35 (dd,  $J = 2.9, 0.7$  Hz, 1H), 7.76 (d,  $J = 1.2$  Hz, 1H), 7.38 (dq,  $J = 15.6, 6.3$  Hz, 1H), 7.34 – 7.30 (m, 1H), 6.48 (dd,  $J = 2.8, 1.5$  Hz, 1H), 2.07 (dd,  $J = 6.4, 1.2$  Hz, 3H).  $^{13}\text{C}$  NMR (125 MHz, Chloroform- $d$ )  $\delta$  163.2, 148.8, 143.7, 128.6, 120.8, 109.6, 18.7. IR (film)  $\nu_{\text{max}}$  3543, 3133, 2941, 1711, 1645, 1384, 910, 809, 772  $\text{cm}^{-1}$ ; HRMS (ESI-TOF)  $m/z$ :  $[\text{M}+\text{H}]^+$  Calcd for  $\text{C}_7\text{H}_9\text{N}_2\text{O}$  137.07096; Found 137.0696.

### General procedure alkyl *N*-benzylideneglycinate **3a-m**:

The following azomethine ylides (**3a-m**) were prepared according to literature procedure.<sup>2</sup>

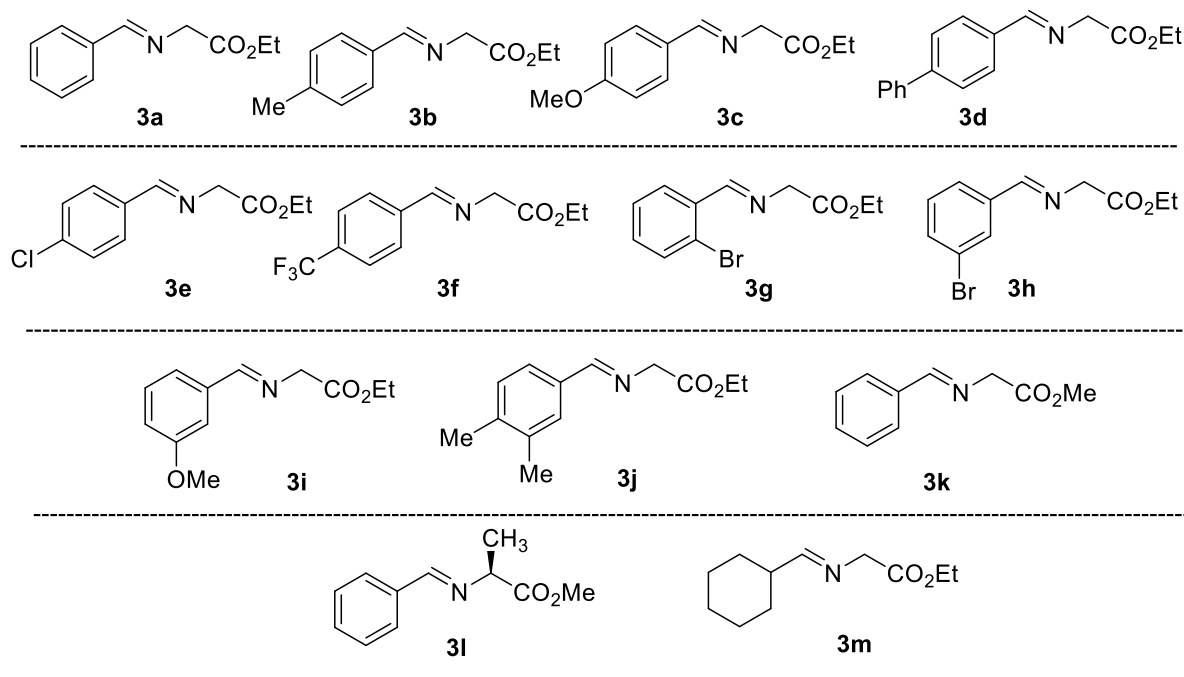

### General procedure for the synthesis of highly substituted pyrrolidine:

In a round bottomed flask,  $\text{Cu}(\text{CH}_3\text{CN})_4\text{BF}_4$  (6.28 mg, 0.02 mmol, 10 mol %) and (*R*)-DM-BINAP (L5) (11.37 mg, 0.024 mmol, 12 mol %) and 50 mg 4Å MS were taken and toluene (2.0 mL) was added to it. The mixture was stirred at room temperature (25 °C) for 1 hour under nitrogen atmosphere. Then azomethine ylide (57.3 mg, 0.3 mmol, 1.5 equiv.) was added slowly and stirred for 5 minutes followed by  $\alpha,\beta$ -unsaturated pyrazolamides (40 mg, 0.2 mmol, 1.0 equiv) and DBU (3  $\mu\text{L}$ , 0.02 mmol, 10 mol %) were added. The reaction mixture was allowed to stir for additional 24 hours at -20 °C. After completion of reaction, the residue was charged over a column packed with silica gel. The cycloaddition products **4aa-4gm** were isolated by flash column chromatography using ethyl acetate and hexane as eluents.

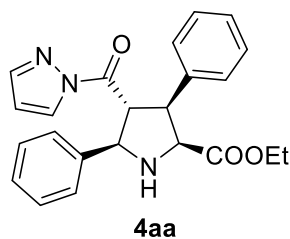

### Ethyl (2*S*,3*S*,4*R*,5*R*)-3,5-diphenyl-4-(1*H*-pyrazole-1-carbonyl)pyrrolidine-2-carboxylate (**4aa**):

White solid, 55 mg, 70% yield. **MP**: 157–160 °C.  $\text{dr} = 85:15$   $[\alpha]_{\text{D}}^{25} = +42.54$  ( $\text{CHCl}_3$ ,  $c = 3.11$  for 98%



ee). **HPLC** (Chiralpak ID , *n*-hexane/ *iso*-propanol = 70/30, 1.0 mL/min, 254 nm):  $t_R$  = 13.06 min (major), 23.33 min (minor).  **$^1\text{H NMR}$**  (500 MHz, Chloroform-*d*)  $\delta$  7.69 (d,  $J$  = 38.8 Hz, 2H), 7.42 (d,  $J$  = 7.5 Hz, 2H), 7.35 (t,  $J$  = 7.5 Hz, 3H), 7.29 – 7.25 (m, 1H), 7.23 – 7.10 (m, 5H), 6.24 (s, 1H), 5.17 (d,  $J$  = 9.4 Hz, 1H), 4.98 (t,  $J$  = 9.7 Hz, 1H), 4.25 (t,  $J$  = 8.6 Hz, 1H), 4.13 (dq,  $J$  = 20.8, 10.1, 8.2 Hz, 3H), 1.16 (t,  $J$  = 7.2 Hz, 3H).  **$^{13}\text{C NMR}$**  (125 MHz, Chloroform-*d*)  $\delta$  172.8, 169.7, 143.7, 139.9, 139.0, 128.7, 128.6, 128.3, 128.3, 128.1, 128.1, 128.1, 127.8, 127.3, 127.1, 109.6, 67.6, 65.6, 61.2, 57.5, 51.8, 14.1. **IR** (film)  $\nu_{\text{max}}$  3433, 2119, 1721, 1645, 1207, 755  $\text{cm}^{-1}$ ; **HRMS** (ES+): Exact mass calcd for  $\text{C}_{23}\text{H}_{23}\text{N}_3\text{O}_3$   $[\text{M}+\text{H}]^+$ : 390.1812. Found: 390.1817

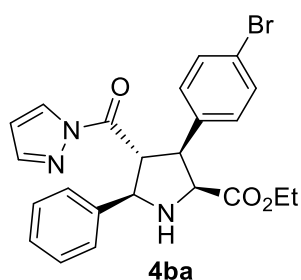

**Ethyl (2S,3S,4R,5R)-3-(4-bromophenyl)-5-phenyl-4-(1H-pyrazole-1-carbonyl)pyrrolidine-2-carboxylate (4ba)**: White solid, 66 mg, 70% yield. **MP**: 123–126 °C.  $\text{dr} = 85:15$ .  $[\alpha]_{\text{D}}^{25} = +27.69$  ( $\text{CHCl}_3$ ,  $c = 0.82$  for 98% ee). **HPLC** (Chiralpak ID , *n*-hexane/ *iso*-propanol = 70/30, 1.0 mL/min, 254 nm):  $t_R$  = 11.03 min (major), 20.94 min (minor).  **$^1\text{H NMR}$**  (500 MHz, Chloroform-*d*)  $\delta$  8.10 (d,  $J$  = 2.8 Hz, 1H), 7.59 – 7.54 (m, 2H), 7.49 (d,  $J$  = 1.5 Hz, 1H), 7.41 – 7.37 (m, 2H), 7.32 (t,  $J$  = 7.3 Hz, 2H), 7.30 – 7.24 (m, 3H), 6.32 (dd,  $J$  = 2.9, 1.5 Hz, 1H), 4.96 (t,  $J$  = 9.8 Hz, 1H), 4.71 (d,  $J$  = 9.5 Hz, 1H), 4.40 (d,  $J$  = 9.3 Hz, 1H), 4.25 (t,  $J$  = 9.7 Hz, 1H), 3.93 – 3.82 (m, 1H), 3.78 – 3.64 (m, 1H), 0.88 (t,  $J$  = 7.1 Hz, 3H).  **$^{13}\text{C NMR}$**  (125 MHz, Chloroform-*d*)  $\delta$  172.42, 171.72, 144.08, 139.02, 136.71, 131.32, 130.11, 128.62, 128.59, 128.16, 128.07, 127.14, 121.33, 110.25, 68.16, 65.37, 61.04, 54.24, 53.88, 13.60. **IR** (film)  $\nu_{\text{max}}$  3429, 2095, 1725, 1643, 1490, 1389, 1202, 755  $\text{cm}^{-1}$ ; **HRMS** (ES+): Exact mass calcd for  $\text{C}_{23}\text{H}_{22}\text{BrN}_3\text{O}_3$   $[\text{M}+\text{H}]^+$ : 468.0917. Found: 468.0904.

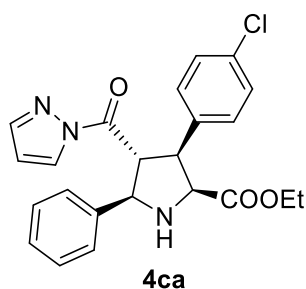

**Ethyl (2S,3S,4R,5R)-3-(4-chlorophenyl)-5-phenyl-4-(1H-pyrazole-1-carbonyl)pyrrolidine-2-carboxylate (4ca)**: White solid, 61 mg, 72% yield. **MP**: 135–138 °C.  $\text{dr} = 90:10$   $[\alpha]_{\text{D}}^{25} = +51.66$

(CHCl<sub>3</sub>, *c* = 0.48 for 98% ee); **HPLC** (Chiralpak ID, *n*-hexane/ *iso*-propanol = 70/30, 1.0 mL/min, 254 nm): *t<sub>R</sub>* = 10.42 min (major), 19.30 min (minor). **<sup>1</sup>H NMR** (500 MHz, Chloroform-*d*) δ 8.10 (d, *J* = 2.9 Hz, 1H), 7.62 – 7.55 (m, 2H), 7.49 (d, *J* = 1.4 Hz, 1H), 7.32 (dd, *J* = 8.1, 6.3 Hz, 4H), 7.30 – 7.26 (m, 1H), 7.26 – 7.21 (m, 2H), 6.31 (dd, *J* = 2.8, 1.4 Hz, 1H), 4.96 (t, *J* = 9.7 Hz, 1H), 4.71 (d, *J* = 9.5 Hz, 1H), 4.46 – 4.35 (m, 1H), 4.26 (t, *J* = 9.5 Hz, 1H), 3.91 – 3.80 (m, 1H), 3.70 (dq, *J* = 10.7, 7.2 Hz, 1H), 2.83 (s, 1H), 0.88 (t, *J* = 7.2 Hz, 3H). **<sup>13</sup>C NMR** (125 MHz, Chloroform-*d*) δ 172.5, 171.8, 144.1, 139.1, 136.2, 133.2, 129.8, 128.6, 128.4, 128.2, 128.1, 127.1, 110.2, 61.0, 13.6. **IR** (film) *v*<sub>max</sub> 3438, 2356, 2117, 1732, 1649, 1207, 751 cm<sup>-1</sup>; **HRMS** (ES<sup>+</sup>): Exact mass calcd for C<sub>23</sub>H<sub>22</sub>ClN<sub>3</sub>O<sub>3</sub> [M+H]<sup>+</sup>: 424.1422. Found: 424.1400.

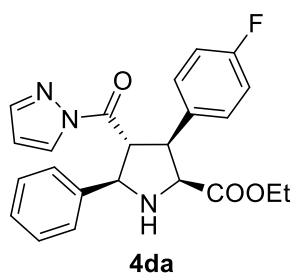

**Ethyl (2*S*,3*S*,4*R*,5*R*)-3-(4-fluorophenyl)-5-phenyl-4-(1*H*-pyrazole-1-carbonyl)pyrrolidine-2-carboxylate (4da):** White solid, 53 mg, 65% yield. **MP:** 88–91 °C. *dr* = 83:17 [*α*]<sub>D</sub><sup>25</sup> = -70.10 (CHCl<sub>3</sub>, *c* = 0.19 for 96% ee). **HPLC** (Chiralpak ID, *n*-hexane/ *iso*-propanol = 70/30, 1.0 mL/min, 254 nm): *t<sub>R</sub>* = 9.90 min (major), 17.78 min (minor). **<sup>1</sup>H NMR** (500 MHz, Chloroform-*d*) δ 8.09 (d, *J* = 2.8 Hz, 1H), 7.58 (d, *J* = 7.5 Hz, 2H), 7.49 (s, 1H), 7.37 – 7.30 (m, 4H), 7.27 (s, 1H), 6.95 (t, *J* = 8.5 Hz, 2H), 6.31 (d, *J* = 2.7 Hz, 1H), 4.99 (t, *J* = 9.9 Hz, 1H), 4.70 (d, *J* = 9.6 Hz, 1H), 4.40 (d, *J* = 9.4 Hz, 1H), 4.29 (t, *J* = 9.8 Hz, 1H), 3.86 (ddd, *J* = 14.6, 9.0, 5.5 Hz, 1H), 3.75 – 3.62 (m, 1H), 0.87 (t, *J* = 7.1 Hz, 3H). **<sup>13</sup>C NMR** (125 MHz, Chloroform-*d*) δ 172.6, 171.8, 144.0, 139.1, 133.3, 130.0, 129.9, 128.6, 128.2, 128.1, 127.2, 115.2, 115.0, 110.2, 68.2, 65.4, 61.0, 54.1, 54.0, 29.7, 13.6. **IR** (film) *v*<sub>max</sub> 3429, 2114, 1645, 1514, 1267, 752 cm<sup>-1</sup>; **HRMS** (ES<sup>+</sup>): Exact mass calcd for C<sub>23</sub>H<sub>22</sub>FN<sub>3</sub>O<sub>3</sub> [M+H]<sup>+</sup>: 408.1718. Found: 408.1743.

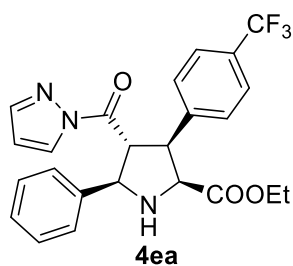

**Ethyl (2*S*,3*S*,4*R*,5*R*)-5-phenyl-4-(1*H*-pyrazole-1-carbonyl)-3-(4-(trifluoromethyl)phenyl)pyrrolidine-2-carboxylate (4ea):** White solid, 55 mg, 60% yield. **MP:** 85–88 °C. *dr* = 88:12 [*α*]<sub>D</sub><sup>25</sup> = -835.13 (CHCl<sub>3</sub>, *c* = 0.15 for 96% ee). **HPLC** (Chiralpak ID, *n*-hexane/

*iso*-propanol = 80/20, 1.0 mL/min, 254 nm):  $t_R$  = 7.49 min (major), 13.44 min (minor);  $^1\text{H NMR}$  (500 MHz, Chloroform-*d*)  $\delta$  8.11 (d,  $J$  = 2.8 Hz, 1H), 7.61 – 7.56 (m, 2H), 7.53 (s, 4H), 7.49 (d,  $J$  = 1.3 Hz, 1H), 7.38 – 7.23 (m, 3H), 6.32 (dd,  $J$  = 2.9, 1.5 Hz, 1H), 5.00 (t,  $J$  = 9.6 Hz, 1H), 4.74 (s, 1H), 4.45 (d,  $J$  = 9.4 Hz, 1H), 4.34 (t,  $J$  = 9.4 Hz, 1H), 3.82 (ddd,  $J$  = 14.1, 8.9, 5.4 Hz, 1H), 3.74 – 3.59 (m, 1H), 2.86 (s, 1H), 0.80 (t,  $J$  = 7.2 Hz, 3H).  $^{13}\text{C NMR}$  (125 MHz, Chloroform-*d*)  $\delta$  172.3, 171.6, 144.1, 142.0, 138.9, 128.8, 128.7, 128.2, 128.1, 127.1, 125.2, 125.1, 123.0, 110.3, 68.1, 65.4, 61.0, 54.3, 54.0, 13.4.  $^{19}\text{F NMR}$  (470 MHz, Chloroform-*d*)  $\delta$  -62.58. **IR** (film)  $\nu_{\text{max}}$  3431, 2101, 1732, 1647, 1328, 753,  $\text{cm}^{-1}$ ; **HRMS** (ES<sup>+</sup>): Exact mass calcd for  $\text{C}_{24}\text{H}_{22}\text{F}_3\text{N}_3\text{O}_3$  [ $\text{M}+\text{Na}$ ]<sup>+</sup>: 480.1505. Found: 480.1480

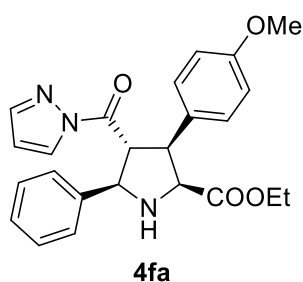

**Ethyl (2S,3S,4R,5R)-3-(4-methoxyphenyl)-5-phenyl-4-(1H-pyrazole-1-carbonyl)pyrrolidine-2-carboxylate (4fa):** White solid, 63 mg, 75% yield. **MP:** 130-133 °C.  $\text{dr} = 90:10$  [ $\alpha$ ]<sub>D</sub><sup>25</sup> = +79.8 (CHCl<sub>3</sub>,  $c = 0.62$  for 99% ee). **HPLC** (Chiralpak IC, *n*-hexane/ *iso*-propanol = 70/30, 1.0 mL/min, 254 nm):  $t_R$  = 12.13 min (major), 24.63 min (minor).  $^1\text{H NMR}$  (500 MHz, Chloroform-*d*)  $\delta$  8.08 (d,  $J$  = 2.9 Hz, 1H), 7.63 – 7.55 (m, 2H), 7.49 (d,  $J$  = 1.4 Hz, 1H), 7.34 – 7.25 (m, 5H), 6.82 – 6.75 (m, 2H), 6.29 (dd,  $J$  = 2.9, 1.5 Hz, 1H), 5.02 (t,  $J$  = 9.9 Hz, 1H), 4.69 (d,  $J$  = 9.9 Hz, 1H), 4.38 (d,  $J$  = 9.4 Hz, 1H), 4.29 (t,  $J$  = 9.7 Hz, 1H), 3.93 – 3.82 (m, 1H), 3.76 (s, 3H), 3.72 – 3.63 (m, 1H), 0.88 (t,  $J$  = 7.2 Hz, 3H).  $^{13}\text{C NMR}$  (125 MHz, Chloroform-*d*)  $\delta$  172.9, 172.0, 158.9, 143.9, 139.2, 129.4, 129.3, 128.6, 128.1, 128.0, 127.2, 113.6, 110.0, 60.9, 55.2, 54.4, 53.8, 13.7. **IR** (film)  $\nu_{\text{max}}$  3422, 2925, 2063, 1731, 1257, 753  $\text{cm}^{-1}$ ; **HRMS** (ES<sup>+</sup>): Exact mass calcd for  $\text{C}_{24}\text{H}_{25}\text{N}_3\text{O}_4$  [ $\text{M}+\text{H}$ ]<sup>+</sup>: 420.1918. Found: 420.1926.

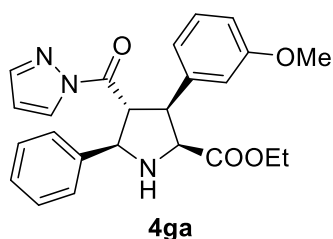

**Ethyl (2S,3S,4R,5R)-3-(3-methoxyphenyl)-5-phenyl-4-(1H-pyrazole-1-carbonyl)pyrrolidine-2-carboxylate (4ga):** White solid, 43.70 mg, 52% yield. **MP:** 145–148 °C.  $\text{dr} = 75:25$  [ $\alpha$ ]<sub>D</sub><sup>25</sup> = +26.06 (CHCl<sub>3</sub>,  $c = 1.42$  for 98% ee). **HPLC** (Chiralpak ID, *n*-hexane/ *iso*-propanol = 60/40, 1.0 mL/min, 254 nm):  $t_R$  = 12.81 min (major), 20.68 min (minor).  $^1\text{H NMR}$  (500 MHz, Chloroform-*d*)  $\delta$  8.06 (d,  $J$  = 2.9 Hz, 1H), 7.61 – 7.52 (m, 2H), 7.47 (d,  $J$  = 1.5 Hz, 1H), 7.32 – 7.27 (m, 2H), 7.24 (dd,  $J$  = 8.4, 6.2 Hz,

2H), 7.14 (t,  $J = 7.9$  Hz, 1H), 6.97 – 6.87 (m, 2H), 6.73 (dd,  $J = 8.0, 2.6$  Hz, 1H), 6.28 (dd,  $J = 2.8, 1.4$  Hz, 1H), 5.05 (t,  $J = 10.0$  Hz, 1H), 4.67 (d,  $J = 9.6$  Hz, 1H), 4.38 (d,  $J = 9.5$  Hz, 1H), 4.30 (t,  $J = 9.8$  Hz, 1H), 3.83 (dd,  $J = 10.7, 7.2$  Hz, 1H), 3.74 (s, 3H), 3.71 – 3.63 (m, 1H), 0.83 (t,  $J = 7.2$  Hz, 3H).  $^{13}\text{C}$  NMR (125 MHz, Chloroform- $d$ )  $\delta$  172.7, 169.7, 159.7, 143.7, 140.6, 139.9, 129.7, 128.1, 128.1, 127.7, 127.1, 120.2, 114.0, 112.6, 109.6, 67.5, 65.6, 61.2, 57.4, 55.2, 51.8, 14.1. IR (film)  $\nu_{\text{max}}$  3436, 3385, 2926, 1734, 1608, 1264, 747, 702  $\text{cm}^{-1}$ ; HRMS (ES $^{+}$ ): Exact mass calcd for  $\text{C}_{24}\text{H}_{25}\text{N}_3\text{O}_4$   $[\text{M}+\text{H}]^{+}$ : 420.1918 Found: 420.1922.

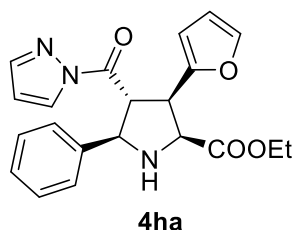

**Ethyl (2S,3R,4R,5R)-3-(furan-2-yl)-5-phenyl-4-(1H-pyrazole-1-carbonyl)pyrrolidine-2-carboxylate (4ha)**: White solid, 34.11 mg, 45% yield. MP: 160–163 °C.  $dr = 64:36$   $[\alpha]_{\text{D}}^{25} = +15.84$  ( $\text{CHCl}_3$ ,  $c = 0.40$  for 40% ee). HPLC (Chiralcel OD-H,  $n$ -hexane/ *iso*-propanol = 70/30, 1.0 mL/min, 254 nm):  $t_{\text{R}} = 8.07$  min (minor), 12.31 min (major).  $^1\text{H}$  NMR (500 MHz, Chloroform- $d$ )  $\delta$  7.75 (d,  $J = 2.8$  Hz, 1H), 7.61 (d,  $J = 1.4$  Hz, 1H), 7.35 (d,  $J = 1.8$  Hz, 1H), 7.21 – 7.03 (m, 5H), 6.29 (dd,  $J = 3.2, 1.8$  Hz, 1H), 6.25 – 6.19 (m, 2H), 5.03 (dt,  $J = 17.5, 9.3$  Hz, 2H), 4.30 (dd,  $J = 10.8, 7.2$  Hz, 1H), 4.21 (dt,  $J = 10.6, 7.1$  Hz, 3H), 2.94 (s, 1H), 1.25 (t,  $J = 7.2$  Hz, 3H).  $^{13}\text{C}$  NMR (125 MHz, Chloroform- $d$ )  $\delta$  172.4, 169.9, 152.2, 143.8, 142.1, 139.2, 128.1, 127.7, 127.0, 110.3, 109.7, 107.1, 65.4, 64.9, 61.4, 54.3, 45.4, 14.2. IR (film)  $\nu_{\text{max}}$  3432, 2085, 1645, 1028, 697, 598  $\text{cm}^{-1}$ ; HRMS (ES $^{+}$ ): Exact mass calcd for  $\text{C}_{21}\text{H}_{21}\text{N}_3\text{O}_4$   $[\text{M}+\text{Na}]^{+}$ : 402.1424. Found: 402.1433.

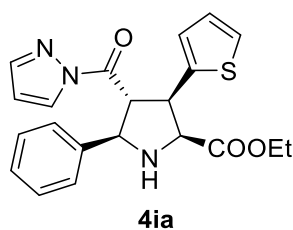

**Ethyl (2S,3R,4R,5R)-5-phenyl-4-(1H-pyrazole-1-carbonyl)-3-(thiophen-2-yl)pyrrolidine-2-carboxylate (4ia)**: White solid, 32 mg, 40% yield. MP: 166–169 °C.  $dr = 50:50$   $[\alpha]_{\text{D}}^{25} = +39.73$  ( $\text{CHCl}_3$ ,  $c = 0.60$  for 52% ee). HPLC (Chiralpak AD-H,  $n$ -hexane/ *iso*-propanol = 70/30, 1.0 mL/min, 254 nm):  $t_{\text{R}} = 13.8$  min (major), 16.3 min (minor).  $^1\text{H}$  NMR (500 MHz, Chloroform- $d$ )  $\delta$  7.75 (d,  $J = 2.9$  Hz, 1H), 7.65 (d,  $J = 1.4$  Hz, 1H), 7.23 – 7.09 (m, 6H), 7.03 (dd,  $J = 3.5, 1.2$  Hz, 1H), 6.94 (dd,  $J = 5.1, 3.5$  Hz, 1H), 6.24 (dd,  $J = 2.9, 1.5$  Hz, 1H), 5.11 (d,  $J = 9.4$  Hz, 1H), 4.93 (t,  $J = 9.7$  Hz, 1H), 4.43 (t,  $J = 9.9$  Hz, 1H), 4.32 – 4.24 (m, 1H), 4.24 – 4.18 (m, 1H), 4.14 (d,  $J = 9.8$  Hz, 1H), 2.58 (s, 1H), 1.23 (t,  $J = 7.1$  Hz, 3H).  $^{13}\text{C}$  NMR (125 MHz, Chloroform- $d$ )  $\delta$  172.3, 169.5, 143.9, 142.2, 139.6, 128.1, 128.1,

127.8, 127.0, 126.9, 125.4, 124.2, 109.7, 68.0, 65.2, 61.4, 58.2, 46.8, 14.2. **IR** (film)  $\nu_{\max}$  3435, 2089, 1641, 1021, 695, 595  $\text{cm}^{-1}$ ; **HRMS** (ES<sup>+</sup>): Exact mass calcd for  $\text{C}_{21}\text{H}_{21}\text{N}_3\text{O}_3\text{S}$  [M+Na]<sup>+</sup>: 418.1196. Found: 418.1215.

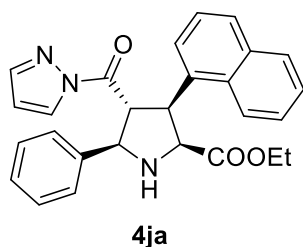

**Ethyl (2S,3S,4R,5R)-3-(naphthalen-1-yl)-5-phenyl-4-(1H-pyrazole-1-carbonyl)pyrrolidine-2-carboxylate (4ja):** White solid, 57 mg, 65% yield. **MP:** 146–149 °C.  $dr = 66:34$  [ $\alpha$ ]<sub>D</sub><sup>27</sup> = +7.20 (CHCl<sub>3</sub>,  $c = 0.70$  for 96% ee). **HPLC** (Chiralpak AD-H, *n*-hexane/ *iso*-propanol = 70/30, 1.0 mL/min, 254 nm):  $t_R = 17.2$  min (major), 33.4 min (minor). **<sup>1</sup>H NMR** (500 MHz, Chloroform-*d*)  $\delta$  8.25 (d,  $J = 8.6$  Hz, 1H), 7.77 (dd,  $J = 8.1, 1.4$  Hz, 1H), 7.69 (d,  $J = 8.1$  Hz, 1H), 7.63 – 7.57 (m, 2H), 7.51 (d,  $J = 1.4$  Hz, 1H), 7.50 – 7.45 (m, 1H), 7.41 (ddd,  $J = 10.0, 8.7, 6.6$  Hz, 2H), 7.21 – 7.18 (m, 2H), 7.12 – 7.05 (m, 3H), 6.10 (dd,  $J = 2.9, 1.4$  Hz, 1H), 5.18 (d,  $J = 9.4$  Hz, 1H), 5.11 (t,  $J = 9.4$  Hz, 1H), 4.96 (t,  $J = 9.5$  Hz, 1H), 4.16 (d,  $J = 9.4$  Hz, 1H), 3.89 (qd,  $J = 7.2, 1.2$  Hz, 2H), 0.68 (t,  $J = 7.1$  Hz, 3H). **<sup>13</sup>C NMR** (125 MHz, Chloroform-*d*)  $\delta$  173.1, 170.2, 143.7, 139.6, 135.7, 133.9, 132.4, 128.8, 128.2, 128.1, 127.8, 127.8, 127.1, 126.3, 125.7, 125.4, 123.2, 109.6, 68.6, 66.0, 61.3, 57.7, 13.5, 1.0. **IR** (film)  $\nu_{\max}$  3431, 2106, 1645, 610  $\text{cm}^{-1}$ ; **HRMS** (ES<sup>+</sup>): Exact mass calcd for  $\text{C}_{27}\text{H}_{25}\text{N}_3\text{O}_3$  [M+H]<sup>+</sup>: 440.1969. Found: 440.1952.

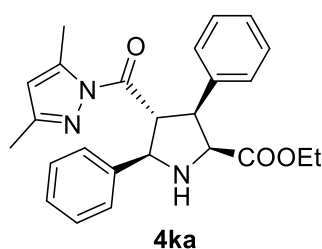

**Ethyl (2S,3S,4R,5R)-4-(3,5-dimethyl-1H-pyrazole-1-carbonyl)-3,5-diphenylpyrrolidine-2-carboxylate (4ka):** White solid, 30 mg, 36% yield. **MP:** 65–68 °C.  $dr = 67:33$  [ $\alpha$ ]<sub>D</sub><sup>25</sup> = +9.30 (CHCl<sub>3</sub>,  $c = 1.54$  for 6% ee). **HPLC** (Chiralcel OD-H, *n*-hexane/ *iso*-propanol = 70/30, 1.0 mL/min, 254 nm):  $t_R = 5.30$  min (minor), 6.12 min (major). **<sup>1</sup>H NMR** (700 MHz, Chloroform-*d*)  $\delta$  7.41 (d,  $J = 7.6$  Hz, 2H), 7.32 (t,  $J = 7.6$  Hz, 2H), 7.23 (t,  $J = 7.4$  Hz, 1H), 7.19 – 7.09 (m, 5H), 5.71 (s, 1H), 5.09 (s, 1H), 4.98 (t,  $J = 10.0$  Hz, 1H), 4.21 (ddd,  $J = 14.2, 8.9, 5.4$  Hz, 1H), 4.10 (dq,  $J = 10.7, 7.1$  Hz, 2H), 4.01 (t,  $J = 10.4$  Hz, 1H), 2.23 (s, 3H), 1.95 (s, 3H), 1.12 (t,  $J = 7.1$  Hz, 3H). **<sup>13</sup>C NMR** (175 MHz, Chloroform-*d*)  $\delta$  170.9, 151.8, 143.9, 128.6, 128.2, 127.9, 127.7, 127.2, 127.1, 110.7, 61.1, 14.1, 13.8, 13.6. **IR** (film)  $\nu_{\max}$  3435, 2120, 1723, 1642, 1208, 750  $\text{cm}^{-1}$ ; **HRMS** (ES<sup>+</sup>): Exact mass calcd for  $\text{C}_{25}\text{H}_{27}\text{N}_3\text{O}_3$  [M+H]<sup>+</sup>: 418.2125. Found: 418.2152

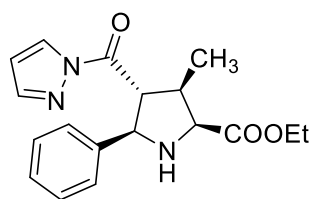

**4a**

**Ethyl (2*S*,3*R*,4*R*,5*R*)-3-methyl-5-phenyl-4-(1*H*-pyrazole-1-carbonyl)pyrrolidine-2-carboxylate (4a)** Viscous colourless oil, 45 mg, 68% yield.  $dr = 72:28$   $[\alpha]_D^{25} = +1.52$  ( $\text{CHCl}_3$ ,  $c = 2.24$  for 96% ee). **HPLC** (Chiralcel OD-H, *n*-hexane/ *iso*-propanol = 85/15, 1.0 mL/min, 254 nm):  $t_R = 7.65$  min (major), 9.14 min (minor).  **$^1\text{H NMR}$**  (500 MHz, Chloroform-*d*)  $\delta$  7.81 (d,  $J = 2.9$  Hz, 1H), 7.68 (s, 1H), 7.45 – 7.32 (m, 1H), 7.13 – 7.06 (m, 4H), 6.28 (d,  $J = 3.0$  Hz, 1H), 4.93 (d,  $J = 9.1$  Hz, 1H), 4.40 – 4.23 (m, 3H), 3.63 (d,  $J = 9.6$  Hz, 1H), 2.93 (td,  $J = 9.7, 6.6$  Hz, 1H), 1.36 (t,  $J = 7.1$  Hz, 3H), 1.28 (d,  $J = 6.6$  Hz, 3H).  **$^{13}\text{C NMR}$**  (125 MHz, Chloroform-*d*)  $\delta$  173.2, 170.3, 143.8, 140.2, 128.1, 127.6, 126.9, 109.6, 109.6, 67.0, 64.8, 61.3, 57.0, 40.9, 16.9, 14.3. **IR** (film)  $\nu_{\text{max}}$  3426, 2978, 1724, 1417, 1387, 1335, 1199, 1027, 760  $\text{cm}^{-1}$ ; **HRMS** (ES<sup>+</sup>): Exact mass calcd for  $\text{C}_{18}\text{H}_{21}\text{N}_3\text{O}_3$   $[\text{M}+\text{H}]^+$ : 328.1656. Found: 328.1673

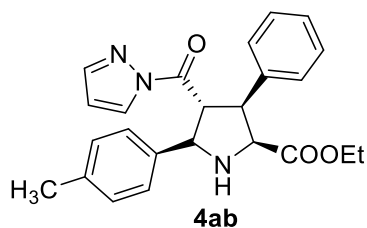

**4ab**

**Ethyl (2*S*,3*S*,4*R*,5*S*)-3-phenyl-4-(1*H*-pyrazole-1-carbonyl)-5-(*p*-tolyl)pyrrolidine-2-carboxylate (4ab)**: White solid, 52 mg, 64% yield. **MP**: 159–162 °C.  $dr = 95:5$   $[\alpha]_D^{25} = +11.76$  ( $\text{CHCl}_3$ ,  $c = 1.22$  for 94% ee). **HPLC** (Chiralpak AD-H, *n*-hexane/ *iso*-propanol = 85/15, 1.0 mL/min, 254 nm):  $t_R = 17.02$  min (major), 18.55 min (minor).  **$^1\text{H NMR}$**  (500 MHz, Chloroform-*d*)  $\delta$  7.98 (d,  $J = 2.8$  Hz, 1H), 7.42 – 7.36 (m, 3H), 7.26 (d,  $J = 7.2$  Hz, 2H), 7.18 – 7.08 (m, 4H), 7.03 (d,  $J = 7.8$  Hz, 2H), 6.20 (dd,  $J = 2.9, 1.5$  Hz, 1H), 4.96 (t,  $J = 10.0$  Hz, 1H), 4.57 (d,  $J = 9.7$  Hz, 1H), 4.30 (d,  $J = 9.5$  Hz, 1H), 4.23 (t,  $J = 9.9$  Hz, 1H), 3.72 (dd,  $J = 10.7, 7.1$  Hz, 1H), 3.51 (dd,  $J = 10.7, 7.2$  Hz, 1H), 2.22 (s, 3H), 0.71 (t,  $J = 7.2$  Hz, 3H).  **$^{13}\text{C NMR}$**  (126 MHz, Chloroform-*d*)  $\delta$  172.8, 172.1, 143.9, 137.8, 137.4, 135.9, 129.3, 128.3, 128.2, 128.0, 127.4, 127.2, 110.0, 68.4, 65.7, 60.9, 55.3, 53.5, 21.1, 13.5. **IR** (film)  $\nu_{\text{max}}$  3430, 1722, 1651, 1381, 1209, 757  $\text{cm}^{-1}$ ; **HRMS** (ES<sup>+</sup>): Exact mass calcd for  $\text{C}_{24}\text{H}_{25}\text{N}_3\text{O}_3$   $[\text{M}+\text{Na}]^+$ : 426.1788. Found: 426.1800.

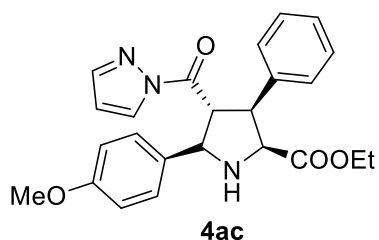

**Ethyl (2S,3S,4R,5S)-5-(4-methoxyphenyl)-3-phenyl-4-(1H-pyrazole-1-carbonyl)pyrrolidine-2-carboxylate (4ac):** White solid, 50.4 mg, 60% yield. **MP:** 128–131 °C.  $dr = 87:13$   $[\alpha]_D^{23} = +90.05$  (CHCl<sub>3</sub>,  $c = 0.50$  for 99% ee). **HPLC** (Chiralpak ID, *n*-hexane/ *iso*-propanol = 70/30, 1.0 mL/min, 254 nm):  $t_R = 12.11$  min (major), 24.63 min (minor). **<sup>1</sup>H NMR** (500 MHz, Chloroform-*d*)  $\delta$  8.04 (d,  $J = 2.9$  Hz, 1H), 7.55 – 7.46 (m, 3H), 7.38 – 7.29 (m, 2H), 7.23 (t,  $J = 7.3$  Hz, 2H), 7.20 – 7.15 (m, 1H), 6.82 (d,  $J = 8.3$  Hz, 2H), 6.27 (dd,  $J = 2.9, 1.5$  Hz, 1H), 5.03 (t,  $J = 9.9$  Hz, 1H), 4.61 (s, 1H), 4.32 (q,  $J = 12.6, 9.4$  Hz, 2H), 3.85 – 3.79 (m, 1H), 3.77 (s, 3H), 3.58 (dd,  $J = 10.6, 7.2$  Hz, 1H), 0.78 (t,  $J = 7.1$  Hz, 3H). **<sup>13</sup>C NMR** (100 MHz, Chloroform-*d*)  $\delta$  172.8, 169.7, 159.0, 143.7, 139.0, 132.1, 128.6, 128.2, 128.1, 128.0, 127.3, 67.5, 65.0, 61.1, 57.6, 55.1, 51.8, 14.1. **IR** (film)  $\nu_{max}$  3421, 2929, 2306, 2121, 1730, 1642, 1515, 1261, 1027, 743 cm<sup>-1</sup>; **HRMS** (ES<sup>+</sup>): Exact mass calcd for C<sub>24</sub>H<sub>25</sub>N<sub>3</sub>O<sub>4</sub> [M+H]<sup>+</sup>: 420.1918. Found: 420.1937.

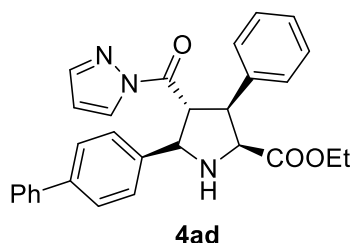

**Ethyl (2S,3S,4R,5S)-5-([1,1'-biphenyl]-4-yl)-3-phenyl-4-(1H-pyrazole-1-carbonyl)pyrrolidine-2-carboxylate (4ad):** White solid, 45 mg, 48% yield. **MP:** 159–162 °C.  $dr = 70:30$   $[\alpha]_D^{22} = +125.40$  (CHCl<sub>3</sub>,  $c = 0.70$  for 94% ee). **HPLC** (Chiralpak ID, *n*-hexane/ *iso*-propanol = 70/30, 1.0 mL/min, 254 nm):  $t_R = 9.95$  min (major), 20.50 min (minor). **<sup>1</sup>H NMR** (500 MHz, Chloroform-*d*)  $\delta$  8.07 (d,  $J = 2.9$  Hz, 1H), 7.64 (d,  $J = 8.0$  Hz, 2H), 7.59 – 7.51 (m, 4H), 7.47 (d,  $J = 1.4$  Hz, 1H), 7.42 (t,  $J = 7.6$  Hz, 2H), 7.38 – 7.32 (m, 3H), 7.24 (t,  $J = 7.3$  Hz, 2H), 7.21 – 7.16 (m, 1H), 6.27 (dd,  $J = 2.9, 1.4$  Hz, 1H), 5.09 (t,  $J = 9.9$  Hz, 1H), 4.73 (d,  $J = 9.7$  Hz, 1H), 4.42 (d,  $J = 9.5$  Hz, 1H), 4.34 (t,  $J = 9.8$  Hz, 1H), 3.82 (dq,  $J = 10.7, 7.1$  Hz, 1H), 3.61 (dq,  $J = 10.7, 7.2$  Hz, 1H), 2.35 (s, 1H), 0.80 (t,  $J = 7.1$  Hz, 3H). **<sup>13</sup>C NMR** (125 MHz, Chloroform-*d*)  $\delta$  172.8, 171.9, 144.0, 140.9, 140.7, 138.1, 137.3, 128.7, 128.3, 128.3, 128.1, 127.7, 127.4, 127.3, 127.0, 110.1, 68.2, 65.6, 60.9, 55.1, 53.6, 13.5. **IR** (film)  $\nu_{max}$  3412, 2119, 1725, 1641, 1387, 1209, 1027, 740 cm<sup>-1</sup>; **HRMS** (ES<sup>+</sup>): Exact mass calcd for C<sub>29</sub>H<sub>27</sub>N<sub>3</sub>O<sub>3</sub> [M+H]<sup>+</sup>: 466.2125. Found: 466.2151.

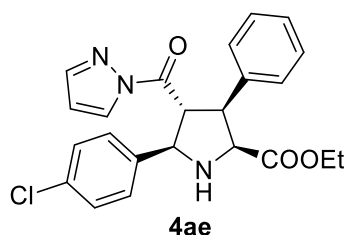

**Ethyl (2S,3S,4R,5R)-5-(4-chlorophenyl)-3-phenyl-4-(1H-pyrazole-1-carbonyl)pyrrolidine-2-carboxylate (4ae):** White solid, 47.5 mg, 56% yield. **MP:** 118–121 °C.  $dr = 77:23$   $[\alpha]_D^{25} = +105.23$  (CHCl<sub>3</sub>,  $c = 0.43$  for 96% ee). **HPLC** (Chiralcel OD-H, *n*-hexane/ *iso*-propanol = 70/30, 1.0 mL/min, 254 nm):  $t_R = 6.01$  min (major), 7.44 min (minor). **<sup>1</sup>H NMR** (500 MHz, Chloroform-*d*)  $\delta$  8.08 (d,  $J = 2.9$  Hz, 1H), 7.62 – 7.53 (m, 2H), 7.49 (d,  $J = 1.5$  Hz, 1H), 7.38 – 7.32 (m, 2H), 7.28 – 7.17 (m, 3H), 7.00 (t,  $J = 8.7$  Hz, 2H), 6.30 (dd,  $J = 2.9, 1.5$  Hz, 1H), 5.05 (t,  $J = 10.0$  Hz, 1H), 4.66 (d,  $J = 9.7$  Hz, 1H), 4.37 (dt,  $J = 19.7, 9.6$  Hz, 2H), 3.82 (dq,  $J = 10.7, 7.1$  Hz, 1H), 3.62 (dq,  $J = 10.7, 7.2$  Hz, 1H), 2.59 (s, 1H), 0.80 (t,  $J = 7.1$  Hz, 3H). **<sup>13</sup>C NMR** (100 MHz, Chloroform-*d*)  $\delta$  172.7, 169.4, 143.9, 138.7, 138.7, 133.5, 128.7, 128.5, 128.3, 128.2, 128.0, 127.4, 109.8, 67.4, 64.6, 61.2, 57.2, 51.3, 14.1. **IR** (film)  $\nu_{max}$  3111, 2928, 1727, 1391, 1208, 758 cm<sup>-1</sup>; **HRMS** (ES<sup>+</sup>): Exact mass calcd for C<sub>23</sub>H<sub>22</sub>ClN<sub>3</sub>O<sub>3</sub> [M+H]<sup>+</sup>: 424.1422. Found: 424.1439.

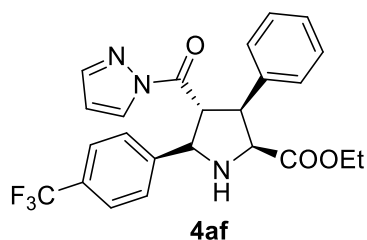

**Ethyl (2S,3S,4R,5S)-3-phenyl-4-(1H-pyrazole-1-carbonyl)-5-(4-(trifluoromethyl)phenyl)pyrrolidine-2-carboxylate (4af):** White solid, 68.5 mg, 75% yield. **MP:** 118–121 °C.  $dr = 94:6$   $[\alpha]_D^{23} = +25.21$  (CHCl<sub>3</sub>,  $c = 0.94$  for 99% ee). **HPLC** (Chiralpak AD-H, *n*-hexane/ *iso*-propanol = 80/20, 1.0 mL/min, 254 nm):  $t_R = 12.03$  min (major), 14.23 min (minor). **<sup>1</sup>H NMR** (500 MHz, Chloroform-*d*)  $\delta$  7.75 (d,  $J = 2.8$  Hz, 1H), 7.67 (s, 1H), 7.42 (dd,  $J = 8.0, 3.8$  Hz, 4H), 7.38 – 7.32 (m, 4H), 7.28 (d,  $J = 7.0$  Hz, 1H), 6.42 – 5.95 (m, 1H), 5.23 (d,  $J = 9.5$  Hz, 1H), 5.00 (t,  $J = 9.8$  Hz, 1H), 4.35 – 3.94 (m, 4H), 3.00 (s, 1H), 1.18 (t,  $J = 7.1$  Hz, 3H). **<sup>13</sup>C NMR** (126 MHz, Chloroform-*d*)  $\delta$  172.7, 169.3, 144.0, 138.6, 128.8, 128.2, 128.1, 127.6, 127.5, 125.0, 109.9, 67.4, 64.7, 61.3, 57.1, 51.2. **IR** (film)  $\nu_{max}$  3427, 2924, 2306, 2128, 1739, 1643, 1510, 1265, 1022, 745 cm<sup>-1</sup>; **HRMS** (ES<sup>+</sup>): Exact mass calcd for C<sub>24</sub>H<sub>22</sub>F<sub>3</sub>N<sub>3</sub>O<sub>3</sub> [M+Na]<sup>+</sup>: 480.1505. Found: 480.1511.



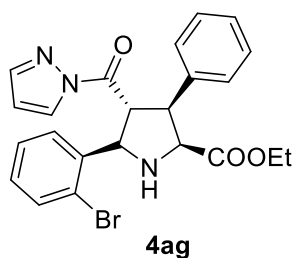

**Ethyl (2*S*,3*S*,4*R*,5*S*)-5-(2-bromophenyl)-3-phenyl-4-(1*H*-pyrazole-1-carbonyl)pyrrolidine-2-carboxylate (4ag):** White solid, 47 mg, 50% yield. **MP:** 150–153 °C.  $dr = 77:23$   $[\alpha]_D^{25} = +12.35$  (CHCl<sub>3</sub>,  $c = 0.16$  for 98% ee). **HPLC** (Chiralpak AD-H, *n*-hexane/ *iso*-propanol = 70/30, 1.0 mL/min, 254 nm):  $t_R = 10.93$  min (major), 12.43 min (minor). **<sup>1</sup>H NMR** (500 MHz, Chloroform-*d*)  $\delta$  7.80 (d,  $J = 2.9$  Hz, 1H), 7.60 (dd,  $J = 7.8, 1.7$  Hz, 1H), 7.52 (d,  $J = 1.4$  Hz, 1H), 7.44 (dt,  $J = 8.4, 1.9$  Hz, 2H), 7.41 – 7.32 (m, 3H), 7.30 – 7.23 (m, 2H), 7.01 (td,  $J = 7.7, 1.7$  Hz, 1H), 6.19 (dd,  $J = 2.9, 1.5$  Hz, 1H), 5.48 (d,  $J = 8.5$  Hz, 1H), 5.17 (dd,  $J = 8.6, 6.6$  Hz, 1H), 4.36 – 4.26 (m, 1H), 4.21 (dq,  $J = 10.7, 7.1$  Hz, 1H), 4.17 – 4.08 (m, 2H), 3.10 (s, 1H), 1.24 (t,  $J = 7.1$  Hz, 3H). **<sup>13</sup>C NMR** (125 MHz, Chloroform-*d*)  $\delta$  172.3, 170.7, 143.7, 140.1, 137.7, 132.4, 129.1, 128.8, 128.4, 127.8, 127.7, 127.3, 124.2, 109.8, 68.0, 64.8, 61.3, 54.8, 53.0, 14.2. **IR** (film)  $\nu_{max}$  3441, 2113, 1729, 1647, 1390, 1264, 1027, 740 cm<sup>-1</sup>; **HRMS** (ES<sup>+</sup>): Exact mass calcd for C<sub>23</sub>H<sub>22</sub>BrN<sub>3</sub>O<sub>3</sub> [M+H]<sup>+</sup>: 468.0917. Found: 468.0926

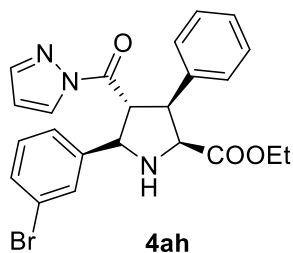

**Ethyl (2*S*,3*S*,4*R*,5*S*)-5-(3-bromophenyl)-3-phenyl-4-(1*H*-pyrazole-1-carbonyl)pyrrolidine-2-carboxylate (4ah):** White solid, 72 mg, 77% yield. **MP:** 140–143 °C.  $dr = 77:23$   $[\alpha]_D^{25} = +0.5$  (CHCl<sub>3</sub>,  $c = 1.1$  for 92% ee). **HPLC** (Chiralpak AD-H, *n*-hexane/ *iso*-propanol = 80/20, 1.0 mL/min, 254 nm):  $t_R = 15.73$  min (major), 16.72 min (minor). **<sup>1</sup>H NMR** (500 MHz, Chloroform-*d*)  $\delta$  7.76 (d,  $J = 2.8$  Hz, 1H), 7.72 – 7.62 (m, 1H), 7.39 (d,  $J = 7.6$  Hz, 2H), 7.32 (t,  $J = 7.5$  Hz, 2H), 7.26 – 7.17 (m, 4H), 7.04 (t,  $J = 7.6$  Hz, 1H), 6.33 – 6.14 (m, 1H), 5.12 (s, 1H), 4.95 (s, 1H), 4.29 – 4.09 (m, 3H), 4.06 (s, 1H), 2.88 (s, 1H), 1.16 (t,  $J = 7.1$  Hz, 3H). **<sup>13</sup>C NMR** (125 MHz, Chloroform-*d*)  $\delta$  169.3, 144.0, 130.8, 130.5, 129.7, 128.7, 128.2, 128.1, 127.4, 125.6, 122.2, 109.9, 61.3, 14.1. **IR** (film)  $\nu_{max}$  3440, 2115, 1728, 1648, 1391, 1265, 1028, 740 cm<sup>-1</sup>; **HRMS** (ES<sup>+</sup>): Exact mass calcd for C<sub>23</sub>H<sub>22</sub>BrN<sub>3</sub>O<sub>3</sub> [M+H]<sup>+</sup>: 468.0917. Found: 468.0924

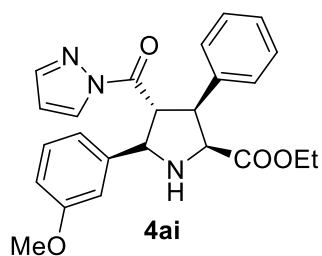

**Ethyl (2S,3S,4R,5S)-5-(3-methoxyphenyl)-3-phenyl-4-(1H-pyrazole-1-carbonyl)pyrrolidine-2-carboxylate (4ai):** White solid, 34 mg, 40% yield. **MP:** 119–122 °C.  $dr = 68:32$   $[\alpha]_D^{25} = +105$  (CHCl<sub>3</sub>,  $c = 0.60$  for 98% ee). **HPLC** (Chiralcel OD-H, *n*-hexane/ *iso*-propanol = 70/30, 1.0 mL/min, 254 nm):  $t_R = 7.21$  min (major), 15.55 min (minor). **<sup>1</sup>H NMR** (500 MHz, Chloroform-*d*)  $\delta$  8.07 (d,  $J = 2.8$  Hz, 1H), 7.50 – 7.48 (m, 1H), 7.35 – 7.31 (m, 2H), 7.25 – 7.20 (m, 3H), 7.18 (d,  $J = 6.9$  Hz, 1H), 7.16 – 7.11 (m, 2H), 6.78 (ddd,  $J = 8.1, 2.6, 1.1$  Hz, 1H), 6.28 (dd,  $J = 2.8, 1.4$  Hz, 1H), 5.04 (t,  $J = 9.8$  Hz, 1H), 4.67 (s, 1H), 4.38 (s, 1H), 4.30 (t,  $J = 9.7$  Hz, 1H), 3.83 – 3.78 (m, 1H), 3.77 (s, 3H), 3.61 – 3.55 (m, 1H), 0.78 (t,  $J = 7.2$  Hz, 3H). **<sup>13</sup>C NMR** (125 MHz, Chloroform-*d*)  $\delta$  172.0, 159.8, 144.0, 140.7, 137.3, 129.6, 128.3, 128.2, 128.1, 127.4, 119.5, 114.1, 112.4, 110.1, 68.5, 65.6, 60.9, 13.5. **IR** (film)  $\nu_{max}$  3429, 2926, 2307, 2132, 1728, 1654, 1511, 1265, 1022, 745 cm<sup>-1</sup>; **HRMS** (ES<sup>+</sup>): Exact mass calcd for C<sub>24</sub>H<sub>25</sub>N<sub>3</sub>O<sub>4</sub> [M+H]<sup>+</sup>: 420.1918. Found: 420.1937.

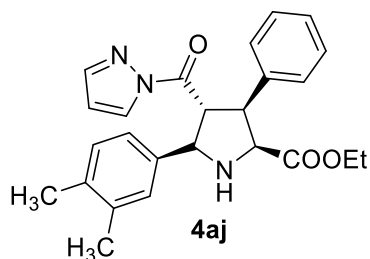

**Ethyl (2S,3S,4R,5S)-5-(3,4-dimethylphenyl)-3-phenyl-4-(1H-pyrazole-1-carbonyl)pyrrolidine-2-carboxylate (4aj):** White solid, 33.5 mg, 40% yield. **MP:** 158–161 °C.  $dr = 66:34$   $[\alpha]_D^{25} = +80$  (CHCl<sub>3</sub>,  $c = 1.08$  for 95% ee). **HPLC** (Chiralpak AD-H, *n*-hexane/ *iso*-propanol = 70/30, 1.0 mL/min, 254 nm):  $t_R = 10.50$  min (minor), 11.40 min (major). **<sup>1</sup>H NMR** (500 MHz, Chloroform-*d*)  $\delta$  7.97 (d,  $J = 2.8$  Hz, 1H), 7.41 (s, 1H), 7.26 (d,  $J = 7.4$  Hz, 2H), 7.22 (d,  $J = 8.6$  Hz, 2H), 7.15 (t,  $J = 7.4$  Hz, 2H), 7.10 (d,  $J = 7.1$  Hz, 1H), 6.98 (d,  $J = 7.6$  Hz, 1H), 6.19 (dd,  $J = 2.9, 1.4$  Hz, 1H), 4.95 (t,  $J = 10.0$  Hz, 1H), 4.55 (d,  $J = 9.7$  Hz, 1H), 4.30 (d,  $J = 9.6$  Hz, 1H), 4.21 (t,  $J = 9.9$  Hz, 1H), 3.75 – 3.63 (m, 1H), 3.56 – 3.43 (m, 1H), 2.13 (s, 3H), 2.12 (s, 3H), 0.70 (t,  $J = 7.1$  Hz, 3H). **<sup>13</sup>C NMR** (125 MHz, Chloroform-*d*)  $\delta$  172.7, 172.2, 143.9, 137.4, 136.7, 136.4, 136.2, 129.8, 128.6, 128.4, 128.2, 128.1, 127.3, 124.5, 110.0, 68.4, 65.7, 60.9, 55.5, 53.4, 19.7, 19.4, 13.5. **IR** (film)  $\nu_{max}$  3429, 2924, 2309, 2125, 1731, 1647, 1515, 1266, 1021, 748 cm<sup>-1</sup>; **HRMS** (ES<sup>+</sup>): Exact mass calcd for C<sub>25</sub>H<sub>27</sub>N<sub>3</sub>O<sub>3</sub> [M+H]<sup>+</sup>: 418.2125. Found: 418.2142.

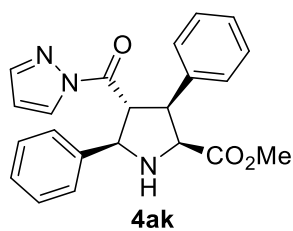

**Methyl (2S,3S,4R,5R)-3,5-diphenyl-4-(1H-pyrazole-1-carbonyl)pyrrolidine-2-carboxylate (4ak):**

White solid, 65.2 mg, 87% yield. **MP:** 130–133 °C.  $dr = 90:10$   $[\alpha]_D^{25} = +81.01$  (CHCl<sub>3</sub>,  $c = 0.65$  for 93% ee). **HPLC** (Chiralpak AD-H, *n*-hexane/ *iso*-propanol = 70/30, 1.0 mL/min, 254 nm):  $t_R = 11.17$  min (major), 14.94 min (inor). **<sup>1</sup>H NMR** (500 MHz, Chloroform-*d*)  $\delta$  7.96 (d,  $J = 2.9$  Hz, 1H), 7.60 – 7.45 (m, 2H), 7.36 (d,  $J = 1.5$  Hz, 1H), 7.30 – 7.19 (m, 4H), 7.15 (dd,  $J = 8.1, 6.8$  Hz, 3H), 7.13 – 7.07 (m, 1H), 6.16 (dd,  $J = 2.9, 1.5$  Hz, 1H), 4.97 (t,  $J = 9.9$  Hz, 1H), 4.61 (d,  $J = 9.6$  Hz, 1H), 4.42 – 4.25 (m, 1H), 4.22 (d,  $J = 9.8$  Hz, 1H), 3.14 (s, 3H), 2.72 (s, 1H). **<sup>13</sup>C NMR** (125 MHz, Chloroform-*d*)  $\delta$  173.2, 171.9, 144.0, 139.2, 137.2, 128.6, 128.3, 128.2, 128.1, 128.0, 127.4, 127.2, 110.1, 68.6, 65.7, 55.1, 51.6. **IR** (film)  $\nu_{max}$  3428, 2926, 2855, 2114, 1737, 1651, 1390, 1208, 752 cm<sup>-1</sup>; **HRMS** (ES<sup>+</sup>): Exact mass calcd for C<sub>22</sub>H<sub>21</sub>N<sub>3</sub>O<sub>3</sub> [M+Na]<sup>+</sup>: 398.1475. Found: 398.1488

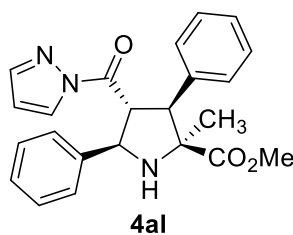

**Methyl (2S,3S,4R,5R)-2-methyl-3,5-diphenyl-4-(1H-pyrazole-1-carbonyl)pyrrolidine-2-carboxylate (4al):**

White solid, 40 mg, 51% yield. **MP:** 127–130 °C.  $dr = 80:20$   $[\alpha]_D^{25} = +12.22$  (CHCl<sub>3</sub>,  $c = 3.20$  for 4% ee). **HPLC** (Chiralpak AD-H, *n*-hexane/ *iso*-propanol = 70/30, 1.0 mL/min, 254 nm):  $t_R = 7.28$  min (major), 17.35 min (minor). **<sup>1</sup>H NMR** (500 MHz, Chloroform-*d*)  $\delta$  7.72 (s, 1H), 7.68 (d,  $J = 2.8$  Hz, 1H), 7.33 (d,  $J = 6.5$  Hz, 4H), 7.29 – 7.25 (m, 1H), 7.25 – 7.20 (m, 2H), 7.16 (d,  $J = 7.0$  Hz, 3H), 6.24 (dd,  $J = 2.9, 1.5$  Hz, 1H), 5.33 (dd,  $J = 11.9, 9.8$  Hz, 1H), 5.18 (s, 1H), 4.47 (d,  $J = 12.0$  Hz, 1H), 3.84 (s, 3H), 3.15 (s, 1H), 1.36 (s, 3H). **<sup>13</sup>C NMR** (125 MHz, Chloroform-*d*)  $\delta$  175.4, 169.7, 143.8, 143.7, 140.1, 136.7, 128.7, 128.4, 128.2, 128.1, 127.7, 127.4, 127.3, 109.6, 109.5, 68.8, 52.5, 52.5. **IR** (film)  $\nu_{max}$  3365, 2928, 2342, 1737, 1410, 1390, 1259, 752 cm<sup>-1</sup>; **HRMS** (ES<sup>+</sup>): Exact mass calcd for C<sub>23</sub>H<sub>23</sub>N<sub>3</sub>O<sub>3</sub> [M+H]<sup>+</sup>: 390.1812. Found: 390.1838

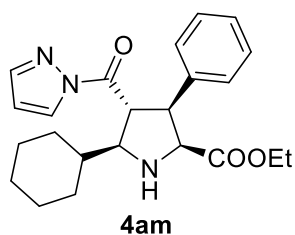

**Ethyl (2S,3S,4R,5S)-5-cyclohexyl-3-phenyl-4-(1H-pyrazole-1-carbonyl)pyrrolidine-2-carboxylate (4am):** Viscous yellowish oil, 42 mg, 53% yield.  $dr = 83:17$   $[\alpha]_D^{25} = -50.00$  ( $\text{CHCl}_3$ ,  $c = 1.27$  for 96% ee). **HPLC** (Chiralpak AD-H, *n*-hexane/ *iso*-propanol = 70/30, 1.0 mL/min, 254 nm):  $t_R = 7.71$  min (major), 8.65 min (minor).  **$^1\text{H NMR}$**  (700 MHz, Chloroform-*d*)  $\delta$  8.16 (d,  $J = 2.9$  Hz, 1H), 7.62 (d,  $J = 1.4$  Hz, 1H), 7.25 – 7.18 (m, 4H), 7.18 – 7.13 (m, 1H), 6.38 (dd,  $J = 2.9, 1.5$  Hz, 1H), 4.58 (t,  $J = 9.0$  Hz, 1H), 4.26 (d,  $J = 9.2$  Hz, 1H), 4.02 (t,  $J = 9.1$  Hz, 1H), 3.75 (dq,  $J = 10.8, 7.1$  Hz, 1H), 3.60 – 3.45 (m, 2H), 2.63 (s, 1H), 2.12 – 2.02 (m, 1H), 1.78 – 1.73 (m, 1H), 1.61 (p,  $J = 4.2, 3.8$  Hz, 1H), 1.58 – 1.52 (m, 1H), 1.27 – 1.05 (m, 7H), 0.77 (t,  $J = 7.2$  Hz, 3H).  **$^{13}\text{C NMR}$**  (175 MHz, Chloroform-*d*)  $\delta$  173.3, 172.1, 144.1, 138.3, 128.3, 128.1, 127.2, 110.2, 70.1, 65.8, 60.8, 55.8, 51.2, 41.6, 30.1, 29.8, 26.3, 26.2, 26.1, 13.5. **IR** (film)  $\nu_{\text{max}}$  3366, 2925, 2852, 1724, 1450, 1387, 1341, 1198, 1027, 769  $\text{cm}^{-1}$ ; **HRMS** (ES<sup>+</sup>): Exact mass calcd for  $\text{C}_{23}\text{H}_{29}\text{N}_3\text{O}_3$   $[\text{M}+\text{H}]^+$ : 396.2282. Found: 396.2298

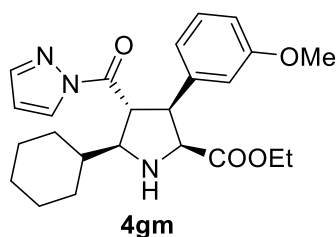

**Ethyl (2S,3S,4R,5S)-5-cyclohexyl-3-(3-methoxyphenyl)-4-(1H-pyrazole-1-carbonyl)pyrrolidine-2-carboxylate (4gm):** Viscous yellowish oil, 50 mg, 59% yield.  $dr = 87:13$   $[\alpha]_D^{25} = +47.09$  ( $\text{CHCl}_3$ ,  $c = 2.39$  for 91% ee). **HPLC** (Chiralpak IC, *n*-hexane/ *iso*-propanol = 80/20, 1.0 mL/min, 254 nm):  $t_R = 7.38$  min (minor), 17.72 min (major).  **$^1\text{H NMR}$**  (500 MHz, Chloroform-*d*)  $\delta$  8.16 (s, 1H), 7.63 (s, 1H), 7.11 (t,  $J = 7.8$  Hz, 1H), 6.86 – 6.75 (m, 2H), 6.69 (d,  $J = 8.2$  Hz, 1H), 6.39 (s, 1H), 4.71 – 4.48 (m, 1H), 4.20 (d,  $J = 19.2$  Hz, 1H), 4.02 (s, 1H), 3.77 (d,  $J = 7.9$  Hz, 1H), 3.72 (s, 3H), 3.61 (t,  $J = 8.9$  Hz, 2H), 2.50 (s, 1H), 2.07 (s, 1H), 1.74 (d,  $J = 13.1$  Hz, 1H), 1.61 – 1.49 (m, 2H), 1.30 – 1.04 (m, 7H), 0.81 (d,  $J = 7.2$  Hz, 3H).  **$^{13}\text{C NMR}$**  (125 MHz, Chloroform-*d*)  $\delta$  159.33, 144.05, 144.03, 129.06, 128.35, 120.79, 113.65, 113.14, 110.19, 60.76, 55.14, 41.64, 26.33, 26.22, 26.06, 13.58. **IR** (film)  $\nu_{\text{max}}$  3365, 2926, 2853, 1725, 1602, 1387, 1199, 1040, 774, 697  $\text{cm}^{-1}$ ; **HRMS** (ES<sup>+</sup>): Exact mass calcd for  $\text{C}_{24}\text{H}_{31}\text{N}_3\text{O}_4$   $[\text{M}+\text{H}]^+$ : 426.2387. Found: 426.2403.

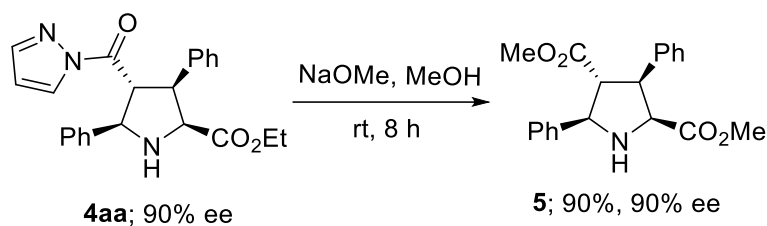

To a solution of **4aa** (77.9 mg, 0.2mol) in MeOH (2 mL) was added NaOMe (21.68 mg, 0.4 mol) at °C. After stirred for 8 hours at room temperature, the reaction was quenched with saturated aqueous NH<sub>4</sub>Cl and extracted three times with EtOAc. Combined organic layers were washed with brine and dried over Na<sub>2</sub>SO<sub>4</sub>. After filtration and evaporation, the residue was purified through a small pad of silica gel by column chromatography (PE/EtOAc) to afford **5** as a colorless viscous gel (61.2 mg, 90%)

**Dimethyl (2S,3S,4R,5R)-3,5-diphenylpyrrolidine-2,4-dicarboxylate (5)** Viscous gel, 61.2 mg, 90% yield.  $[\alpha]_D^{25} = +152.27$  (CHCl<sub>3</sub>, c = 0.63 for 90% ee). **HPLC** (Chiralcel OD-H, *n*-hexane/ *iso*-propanol = 60/40, 1.0 mL/min, 210 nm):  $t_R = 3.6$  min (minor), 5.3 min (major). **<sup>1</sup>H NMR** (500 MHz, Chloroform-*d*)  $\delta$  7.66 – 7.58 (m, 2H), 7.42 (t,  $J = 7.4$  Hz, 2H), 7.39 – 7.21 (m, 7H), 4.55 (d,  $J = 9.7$  Hz, 1H), 4.36 (d,  $J = 9.5$  Hz, 1H), 4.12 (t,  $J = 9.7$  Hz, 1H), 3.55 (s, 3H), 3.41 (t,  $J = 9.8$  Hz, 1H), 3.25 (s, 3H). **<sup>13</sup>C NMR** (125 MHz, Chloroform-*d*)  $\delta$  173.2, 173.1, 140.2, 138.0, 128.8, 128.4, 128.1, 128.0, 127.4, 127.1, 66.9, 65.3, 57.3, 53.6, 52.0, 51.5. **IR** (film)  $\nu_{max}$  3381, 3037, 3031, 2927, 2105, 1958, 1739, 1440, 1266, 1170, 752, 703 cm<sup>-1</sup>; **HRMS** (ES<sup>+</sup>): Exact mass calcd for C<sub>20</sub>H<sub>21</sub>NO<sub>4</sub> [M+H]<sup>+</sup>: 340.1543. Found: 340.1563.

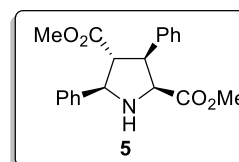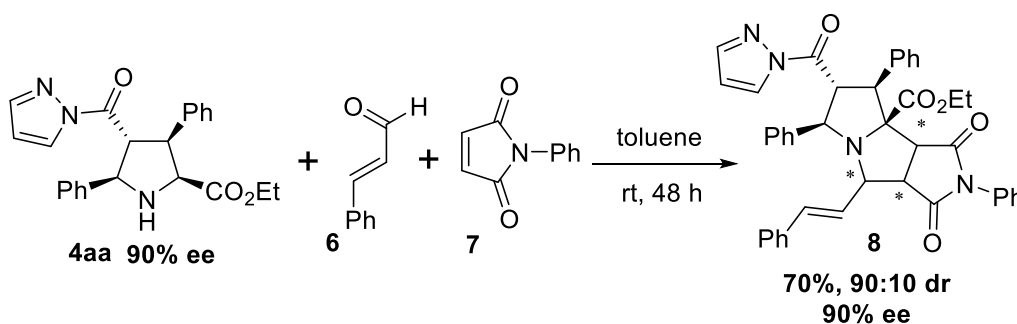

To a solution of **4aa** (77.9 mg, 0.2mol) in toluene (2 mL) were added *trans*-cinnamaldehyde (**6**) (21.68 mg, 0.4 mol) and *N*-phenylmaleimide (**7**) at room temperature. The reaction mixture was allowed to stir for 48 h at room temperature. After completion of the reaction, the residue was charged over a column packed with silica gel. The pyrrolizidine derivative **8** was isolated as white solid ( 70% yield by flash column chromatography using 25-30% EtOAc in hexanes as the eluent.

**Ethyl (6R,7R,8S,8aS)-1,3-dioxo-2,6,8-triphenyl-7-(1H-pyrazole-1-carbonyl)-4-((E)-styryl)tetrahydro-1H,4H-3a13,4l3,8bl3-pyrrolo[3,4-a]pyrrolizine-8a(6H)-carboxylate (8):** White solid, 95 mg, 70% yield. **MP:** 220-223 °C.  $dr = 90:10$   $[\alpha]_D^{25} = +2.85$  (CHCl<sub>3</sub>,  $c = 1.11$  for 90% ee). **HPLC** (Chiralpak AD-H, *n*-hexane/ *iso*-propanol = 60/40, 1.0 mL/min, 254 nm):  $t_R = 8.70$  min (minor), 13.90 min (major). **<sup>1</sup>H NMR** (500 MHz, Chloroform-*d*)  $\delta$  8.18 (d,  $J = 2.9$  Hz, 1H), 7.56 (d,  $J = 7.6$  Hz, 2H), 7.49 (t,  $J = 7.7$  Hz, 2H), 7.44 – 7.38 (m, 6H), 7.28 (t,  $J = 3.9$  Hz, 2H), 7.21 (t,  $J = 7.3$  Hz, 3H), 7.15 (dt,  $J = 4.3, 2.4$  Hz, 4H), 6.81 (dd,  $J = 6.7, 2.9$  Hz, 2H), 6.59 (d,  $J = 15.8$  Hz, 1H), 6.35 (t,  $J = 2.1$  Hz, 1H), 5.94 (dd,  $J = 15.8, 7.3$  Hz, 1H), 5.13 (t,  $J = 9.2$  Hz, 1H), 4.78 (d,  $J = 9.0$  Hz, 1H), 4.61 (t,  $J = 7.5$  Hz, 1H), 4.50 (d,  $J = 9.4$  Hz, 1H), 4.32 (d,  $J = 10.2$  Hz, 1H), 4.03 (dd,  $J = 10.2, 7.6$  Hz, 1H), 3.87 – 3.73 (m, 2H), 0.82 (t,  $J = 7.2$  Hz, 3H). **<sup>13</sup>C NMR** (125 MHz, Chloroform-*d*)  $\delta$  175.3, 171.6, 169.5, 144.3, 141.0, 138.4, 136.3, 132.2, 129.1, 128.6, 128.4, 128.3, 128.2, 128.0, 127.7, 127.6, 127.1, 126.7, 126.6, 126.5, 126.1, 84.8, 68.6, 66.1, 57.6, 57.2, 52.4, 13.4. **IR** (film)  $\nu_{max}$  3472, 3062, 2925, 2260, 1951, 1887, 1775, 1719, 1603, 1382, 1205, 747 cm<sup>-1</sup>; **HRMS** (ES<sup>+</sup>): Exact mass calcd for C<sub>42</sub>H<sub>36</sub>N<sub>4</sub>O<sub>5</sub> [M+Na]<sup>+</sup> 699.2578; Found 699.2564.

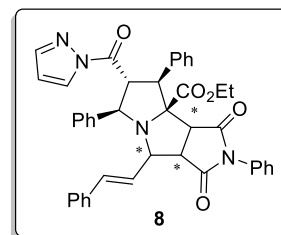

## References:

- [1] a) X. Ding, C. Tian, Y. Hu, L. Gong, E. Meggers, *Eur. J. Org. Chem.* **2016**, 887; b) Y. Zheng, Y. Yao, L. Ye, Z. Shi, X. Li, Z. Zhao, X. Li, *Tetrahedron* **2016**, 72, 973.
- [2] a) L. Dai, D. Xu, L. W. Tang, Z. M. Zhou, *Chem. Cat. Chem.* **2015**, 7, 1078; (b) A. López-Pérez, J. Adrio, J. C. Carretero, *Angew. Chem. Int. Ed.* **2009**, 48, 340; c) I. Oura, K. Shimizu, K. Ogata, S.-I. Fukuzawa, *Org. Lett.* **2010**, 12, 175.

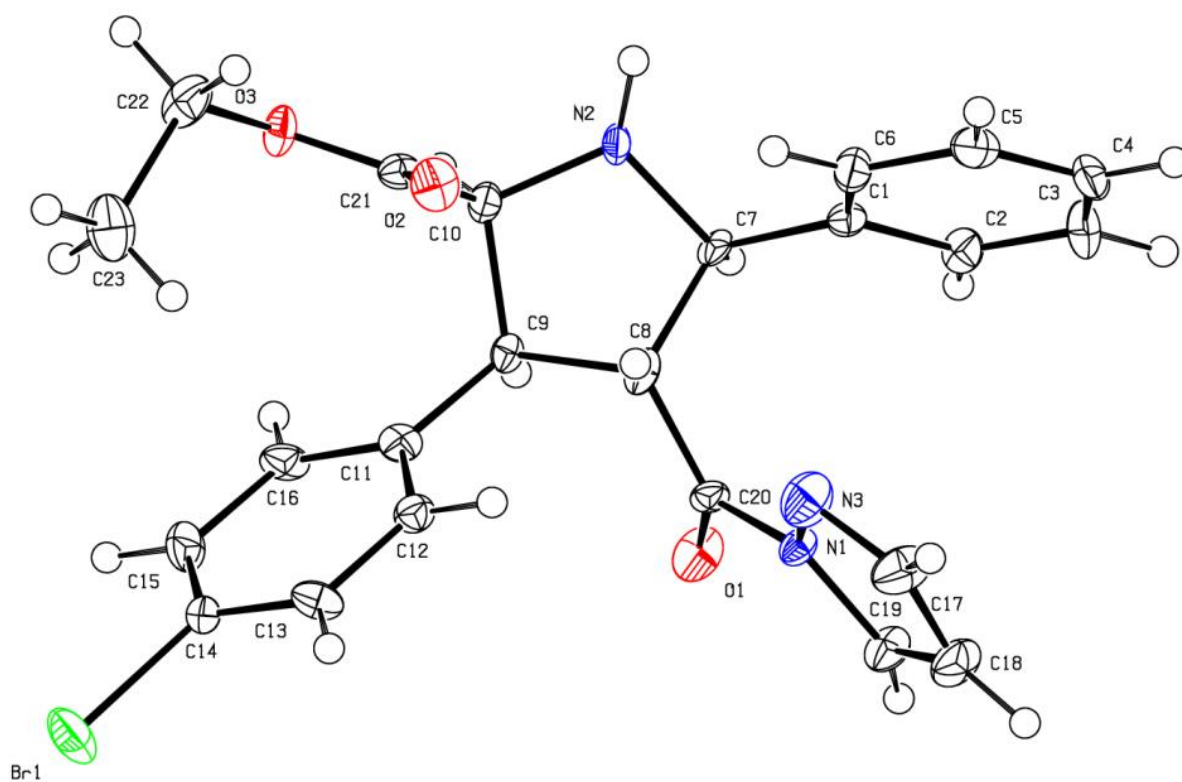

Crystal structure (with 50% ellipsoid probability) of **4ba**(CCDC No. **1578386**)

**Table:** Crystallographic data and structure refinement for **4ba** (CCDC No. **1578386**)

|                                                              |                                                                              |
|--------------------------------------------------------------|------------------------------------------------------------------------------|
| Empirical formula                                            | C <sub>23</sub> H <sub>22</sub> BrN <sub>3</sub> O <sub>3</sub>              |
| Formula weight                                               | 468.35                                                                       |
| Temperature/K                                                | 140                                                                          |
| Crystal system                                               | triclinic                                                                    |
| Space group                                                  | <i>P</i> <sub>1</sub>                                                        |
| <i>a</i> /Å                                                  | 5.6515(12)                                                                   |
| <i>b</i> /Å                                                  | 8.034(2)                                                                     |
| <i>c</i> /Å                                                  | 12.082(3)                                                                    |
| $\alpha$ /°                                                  | 81.886(8)                                                                    |
| $\beta$ /°                                                   | 88.585(9)                                                                    |
| $\gamma$ /°                                                  | 73.865(9)                                                                    |
| Volume/Å <sup>3</sup>                                        | 521.6(2)                                                                     |
| <i>Z</i>                                                     | 1                                                                            |
| $\rho_{\text{calc}}$ /cm <sup>3</sup>                        | 1.491                                                                        |
| $\mu$ /mm <sup>-1</sup>                                      | 2.0                                                                          |
| <i>F</i> (000)                                               | 240                                                                          |
| Crystal size/mm <sup>3</sup>                                 | 0.29 × 0.21 × 0.12                                                           |
| Radiation                                                    | MoK $\alpha$ ( $\lambda$ = 0.71073)                                          |
| 2 $\theta$ range for data collection/°                       | 5.92 to 61.16                                                                |
| Index ranges                                                 | -8 ≤ <i>h</i> ≤ 6, -10 ≤ <i>k</i> ≤ 10, -14 ≤ <i>l</i> ≤ 17                  |
| Reflections collected                                        | 3016                                                                         |
| Independent reflections                                      | 2978 [ <i>R</i> <sub>int</sub> = 0.0945, <i>R</i> <sub>sigma</sub> = 0.1550] |
| Data/restraints/parameters                                   | 2978/3/271                                                                   |
| Goodness-of-fit on <i>F</i> <sup>2</sup>                     | 0.926                                                                        |
| Final <i>R</i> indexes [ <i>I</i> ≥ 2 $\sigma$ ( <i>I</i> )] | <i>R</i> <sub>1</sub> = 0.0615, <i>wR</i> <sub>2</sub> = 0.1341              |
| Final <i>R</i> indexes [all data]                            | <i>R</i> <sub>1</sub> = 0.0922, <i>wR</i> <sub>2</sub> = 0.1497              |
| Largest diff. peak/hole / e Å <sup>-3</sup>                  | 0.501/-0.585                                                                 |
| Flack parameter                                              | 0.031(15)                                                                    |



# <sup>1</sup>H NMR and <sup>13</sup>C NMR spectra of products:

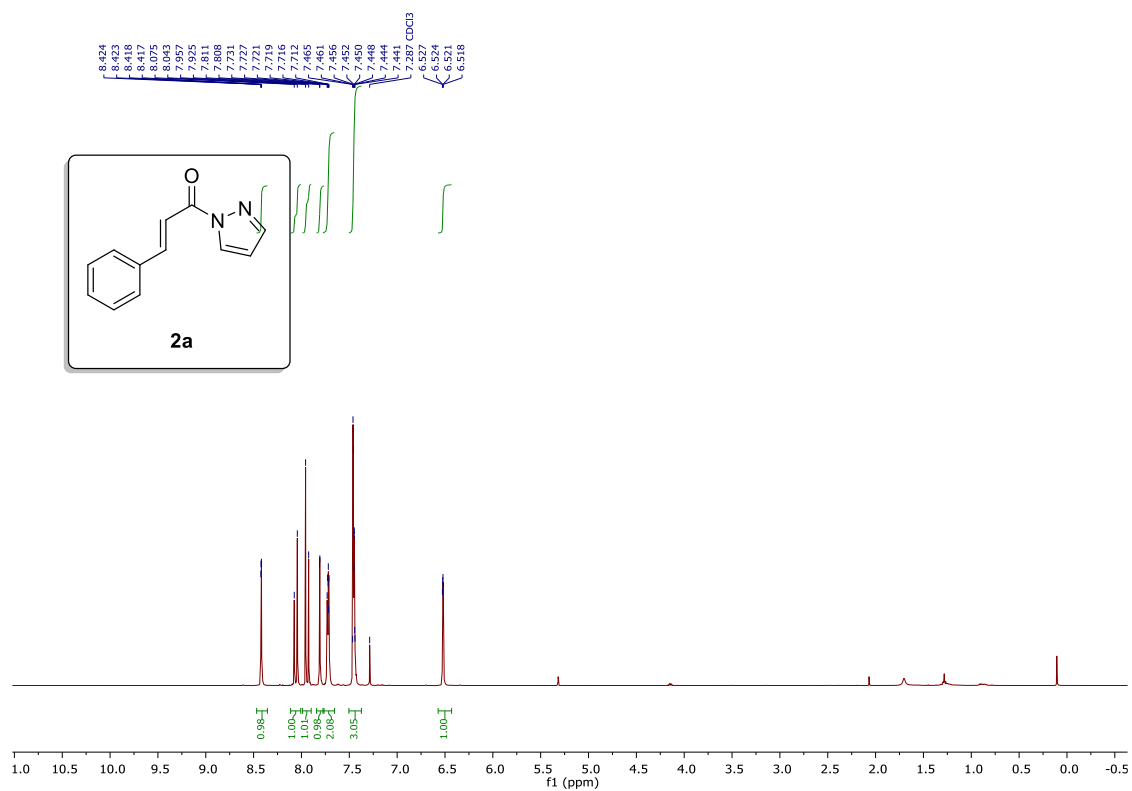

## <sup>1</sup>H NMR (500 MHz, CDCl<sub>3</sub>) of compound **2a**

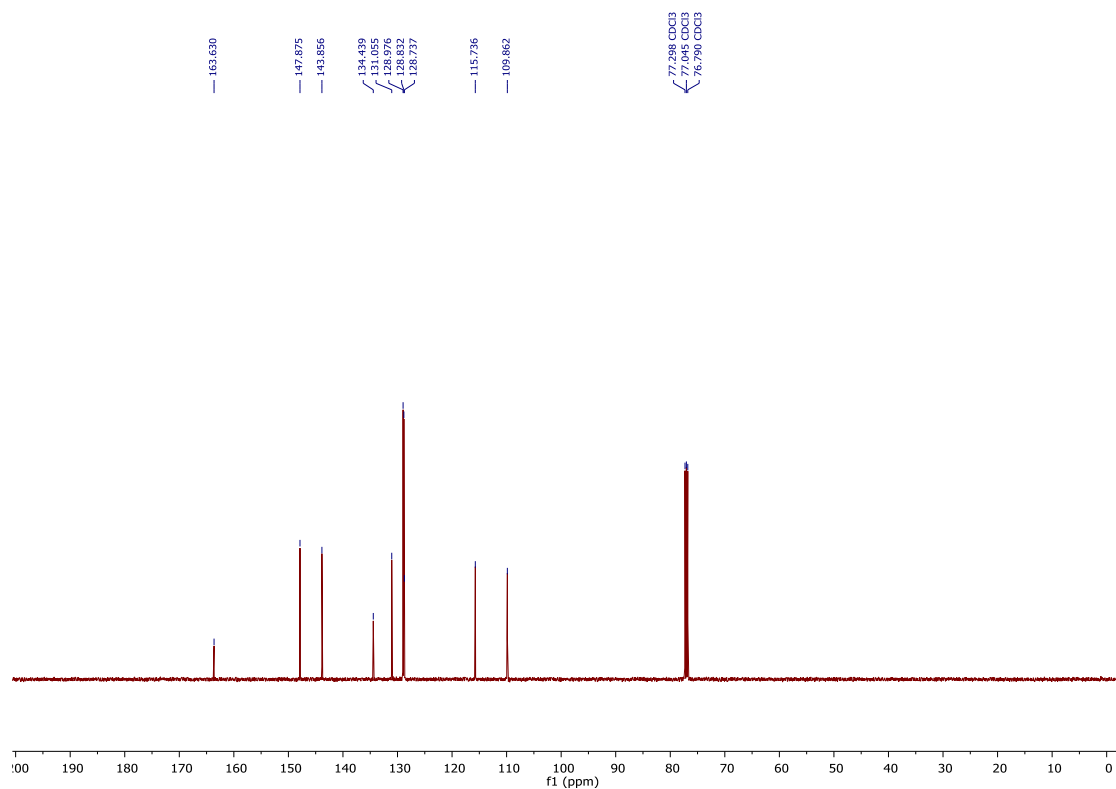

## <sup>13</sup>C NMR (125 MHz, CDCl<sub>3</sub>) of compound **2a**

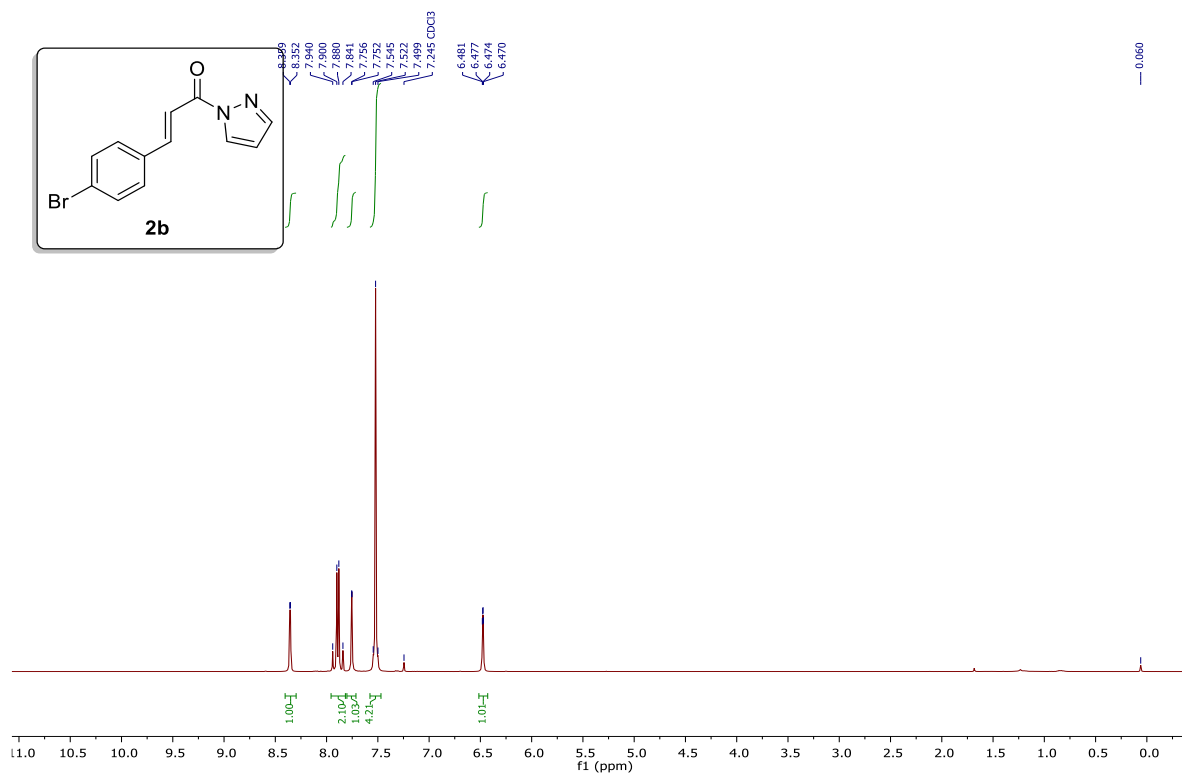

<sup>1</sup>H NMR (400 MHz, CDCl<sub>3</sub>) of compound **2b**

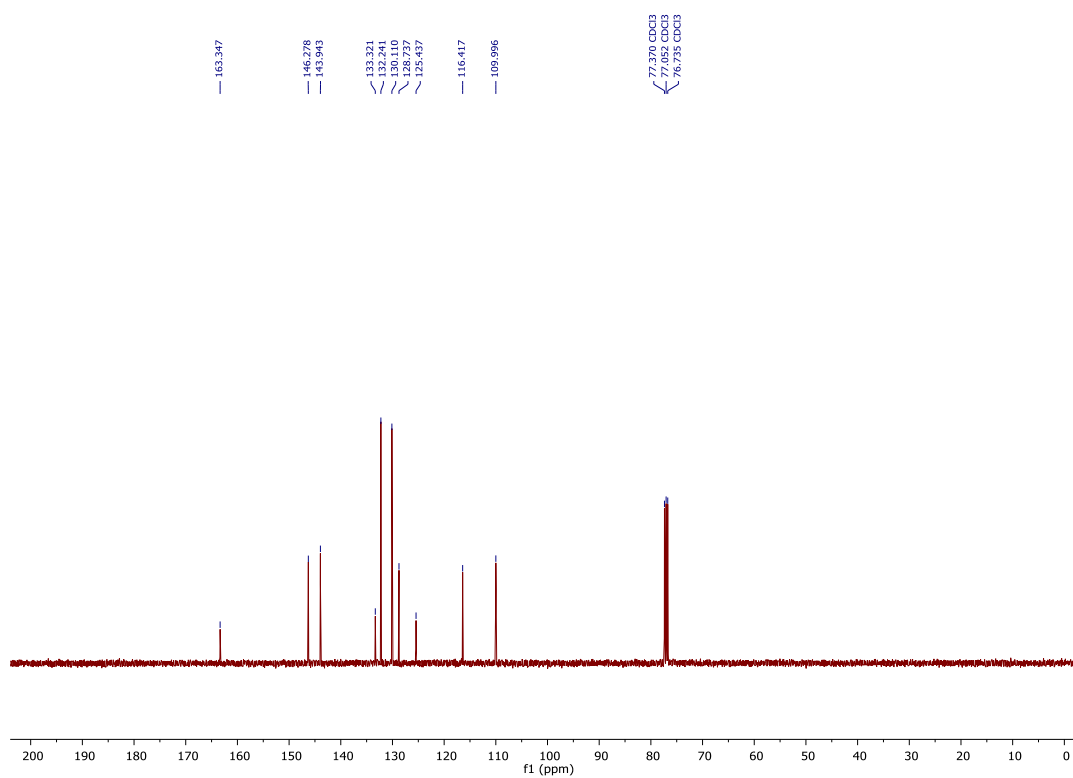

<sup>13</sup>C NMR (100 MHz, CDCl<sub>3</sub>) of compound **2b**

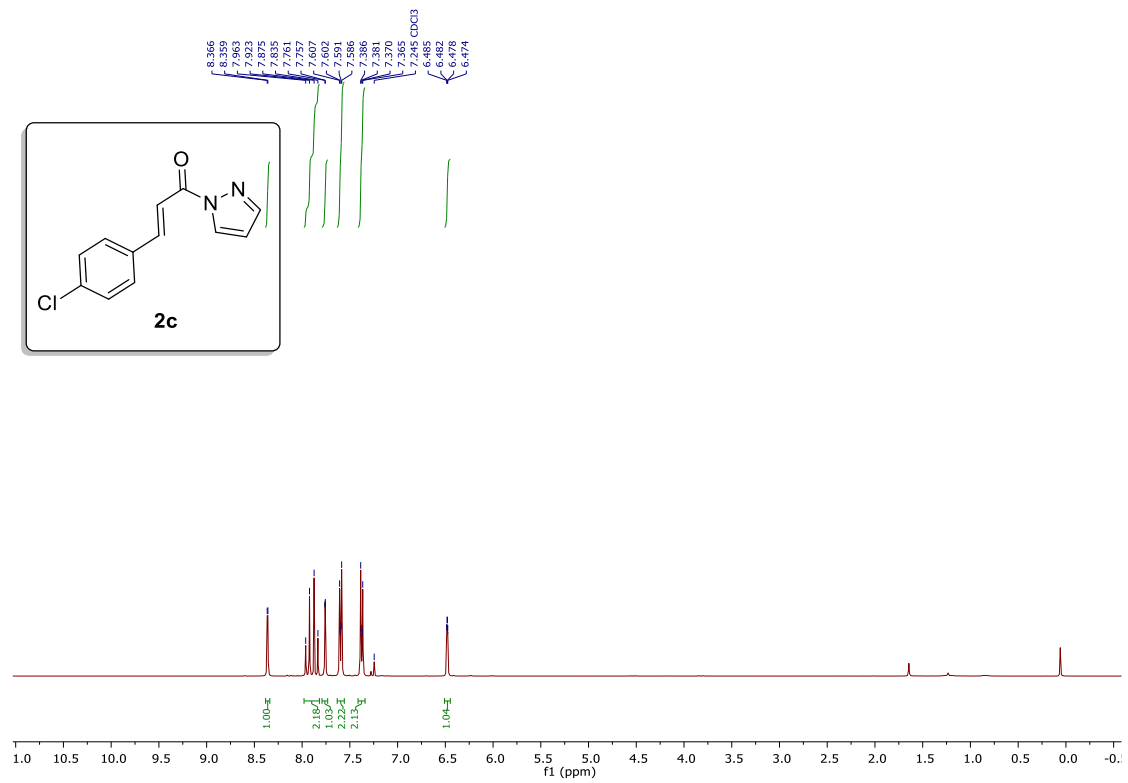

$^1\text{H NMR}$  (400 MHz,  $\text{CDCl}_3$ ) of compound **2c**

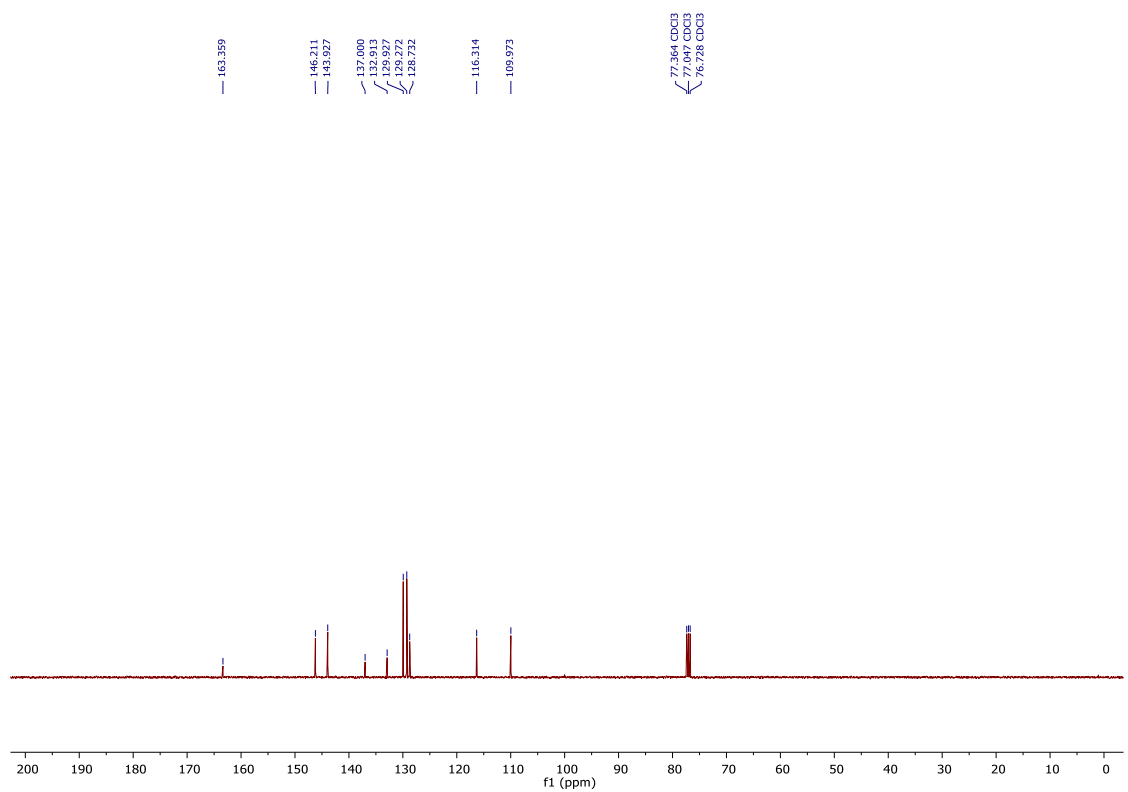

$^{13}\text{C NMR}$  (100 MHz,  $\text{CDCl}_3$ ) of compound **2c**

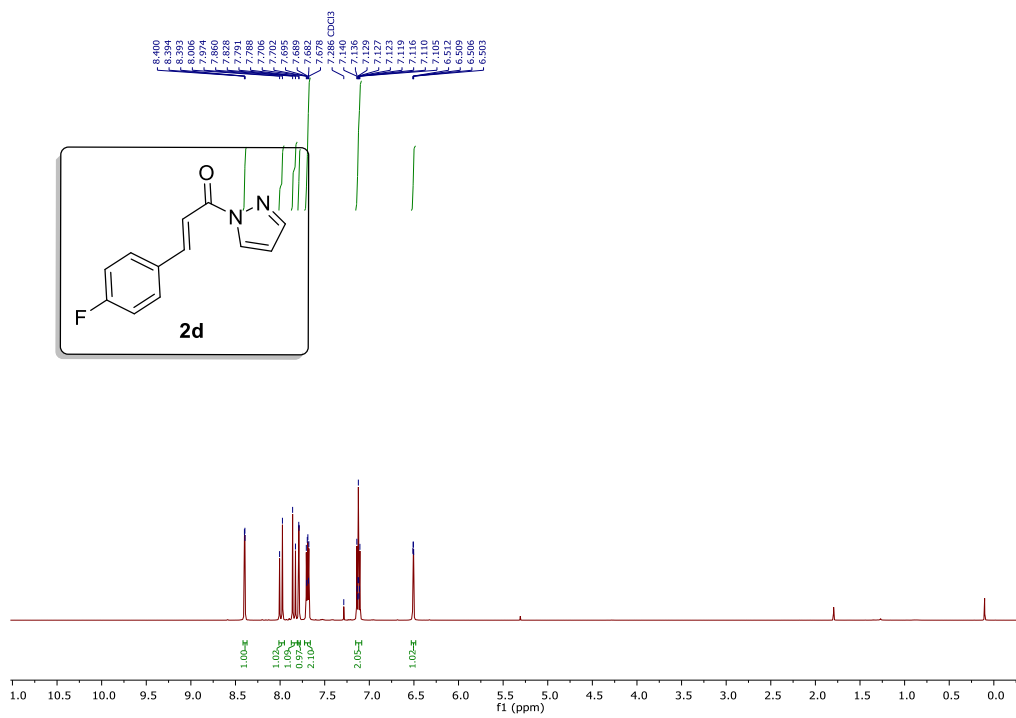

<sup>1</sup>H NMR (500 MHz, CDCl<sub>3</sub>) of compound **2d**

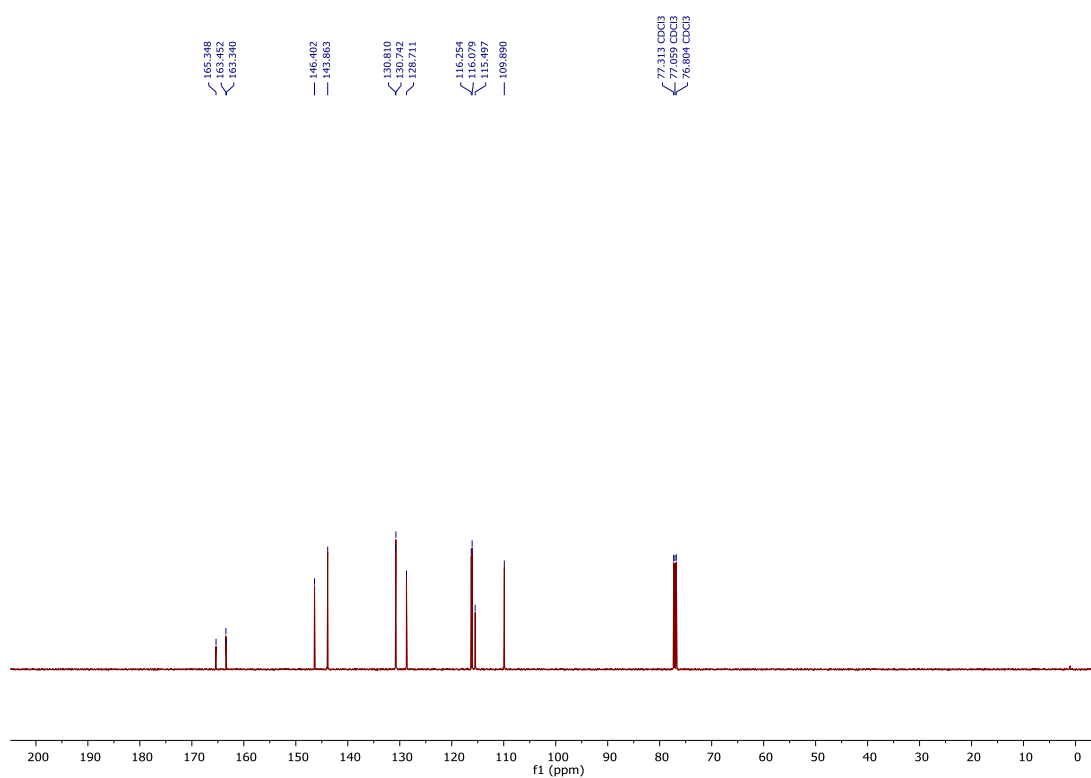

<sup>13</sup>C NMR (125 MHz, CDCl<sub>3</sub>) of compound **2d**

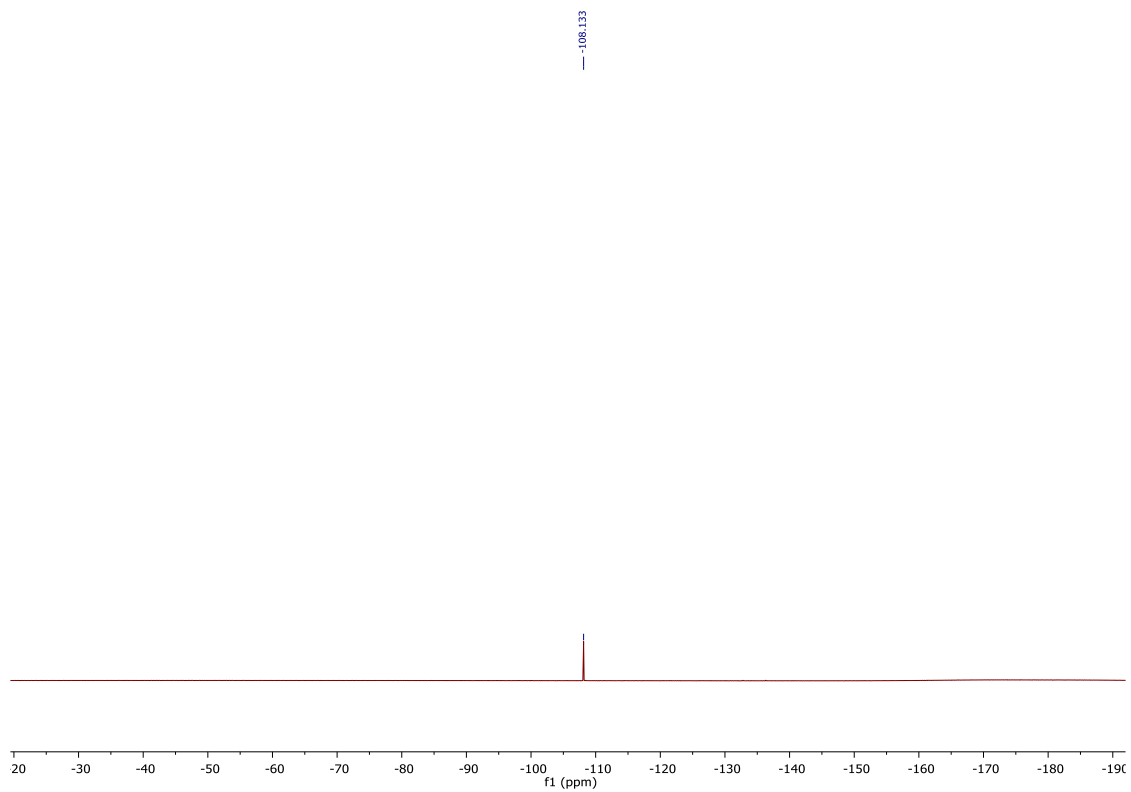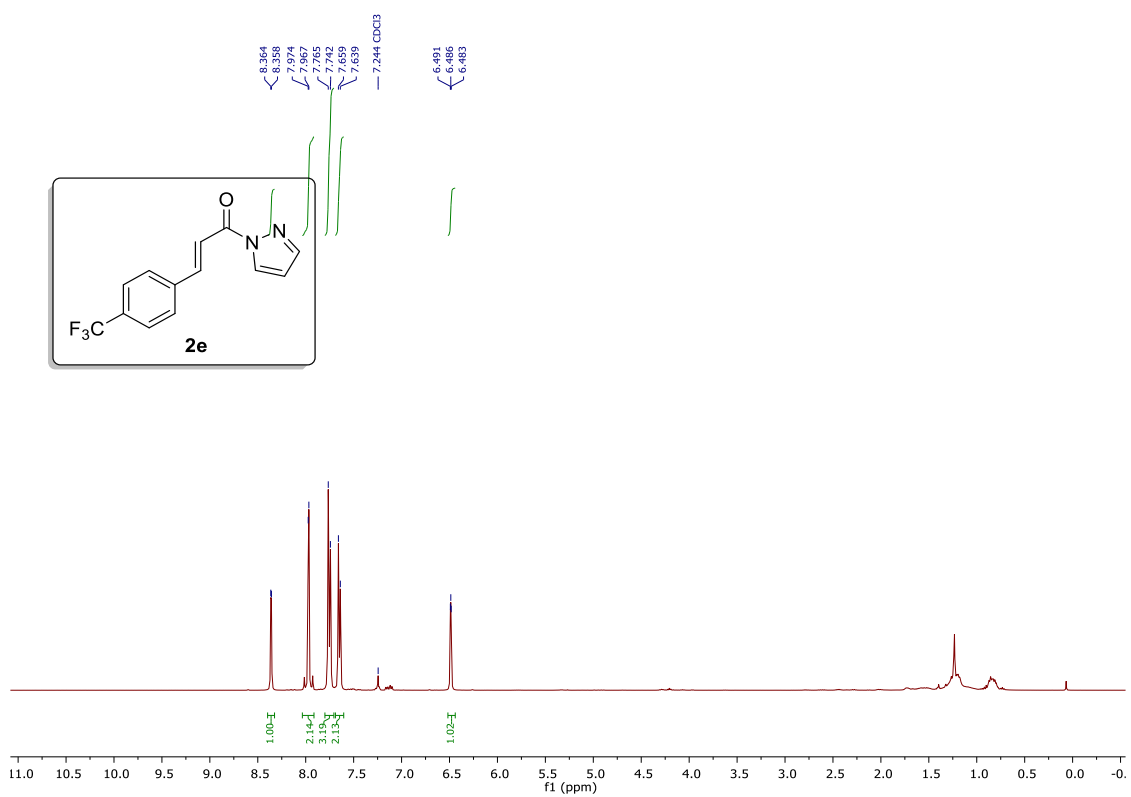

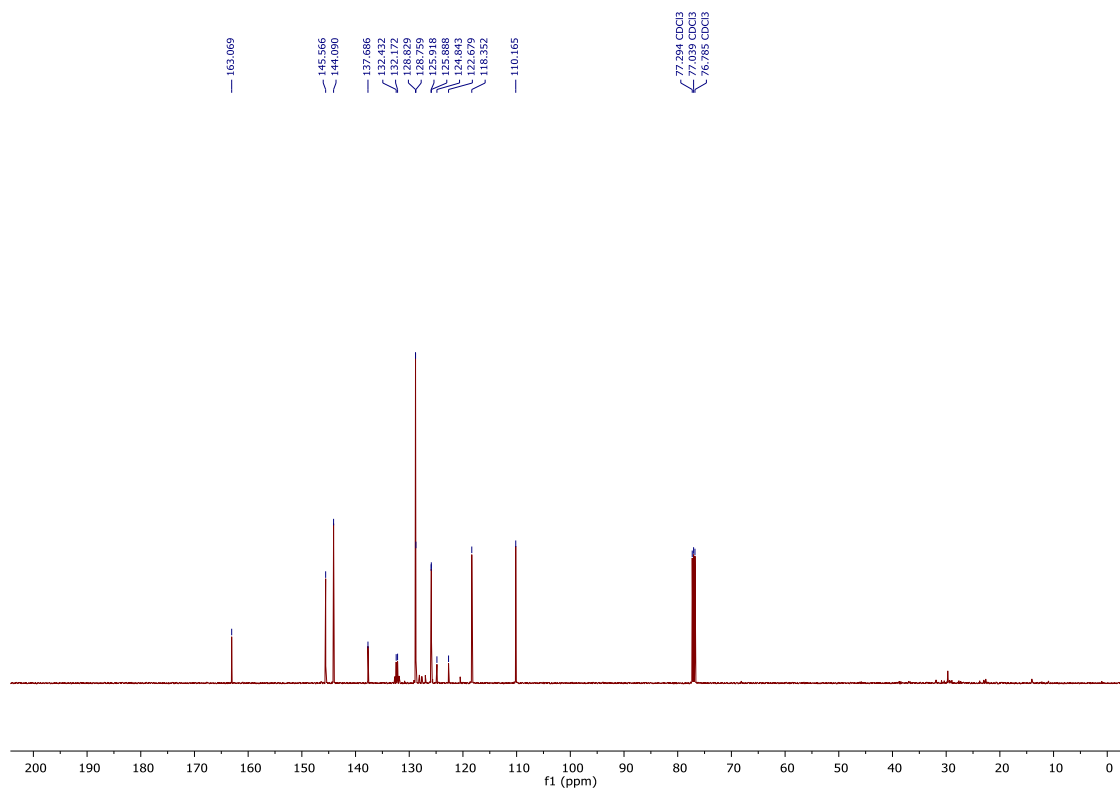

<sup>13</sup>C NMR (125 MHz, CDCl<sub>3</sub>) of compound **2e**

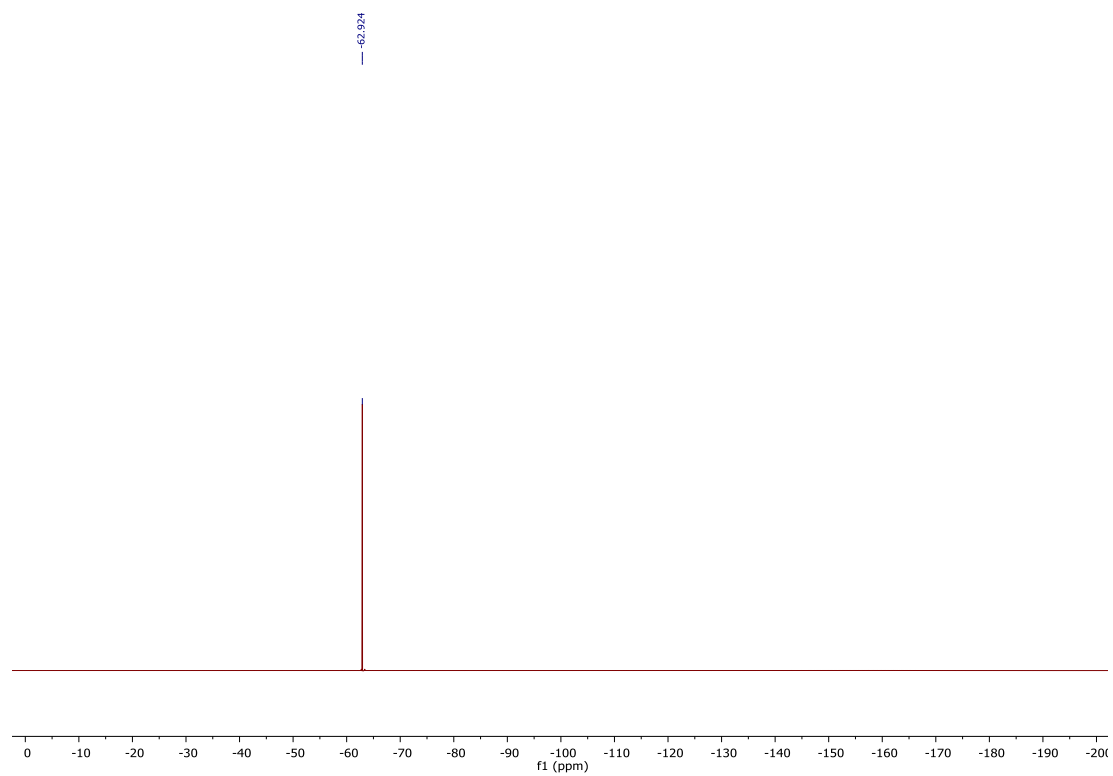

<sup>19</sup>F NMR (470 MHz, CDCl<sub>3</sub>) of compound **2e**

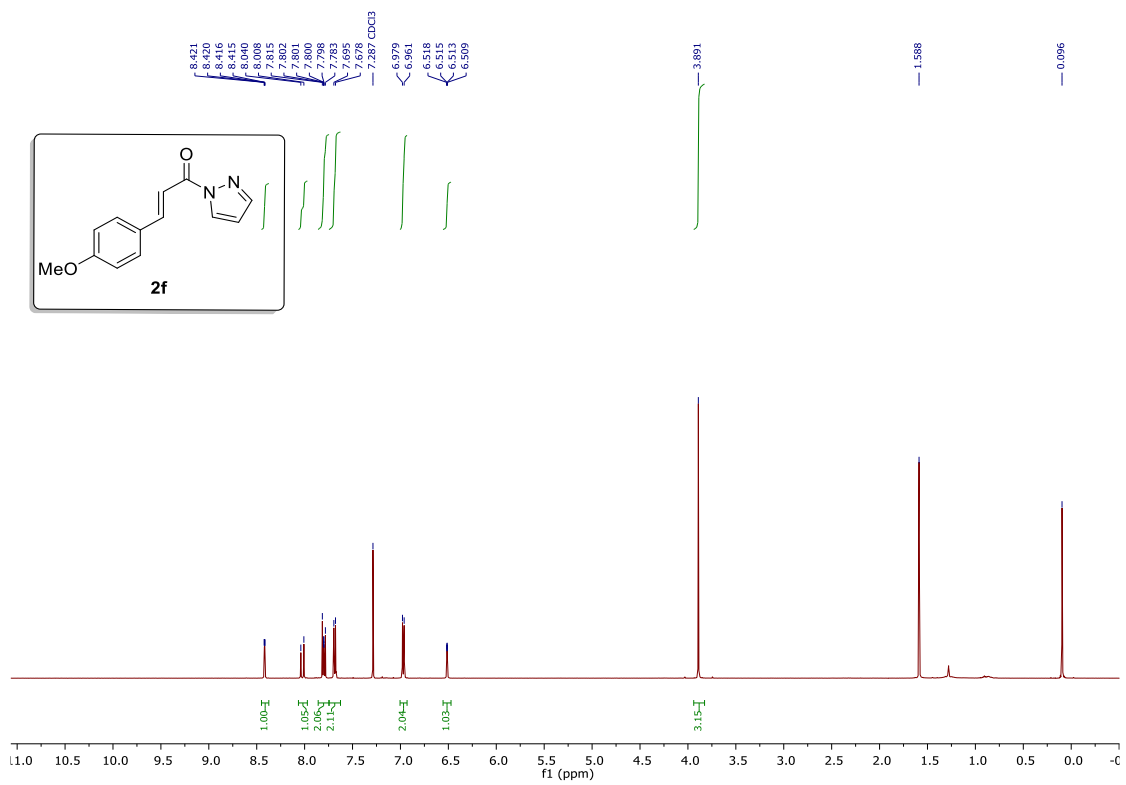

<sup>1</sup>H NMR (500 MHz, CDCl<sub>3</sub>) of compound **2f**

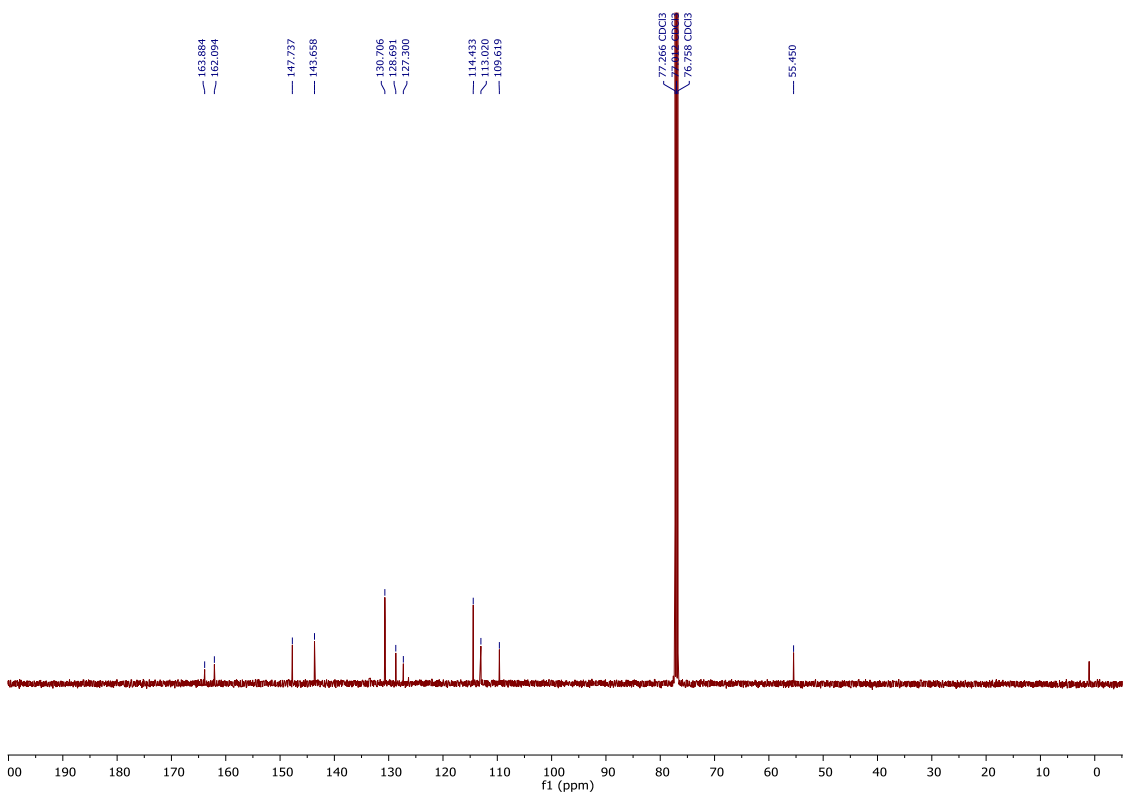

<sup>13</sup>C NMR (125 MHz, CDCl<sub>3</sub>) of compound **2f**

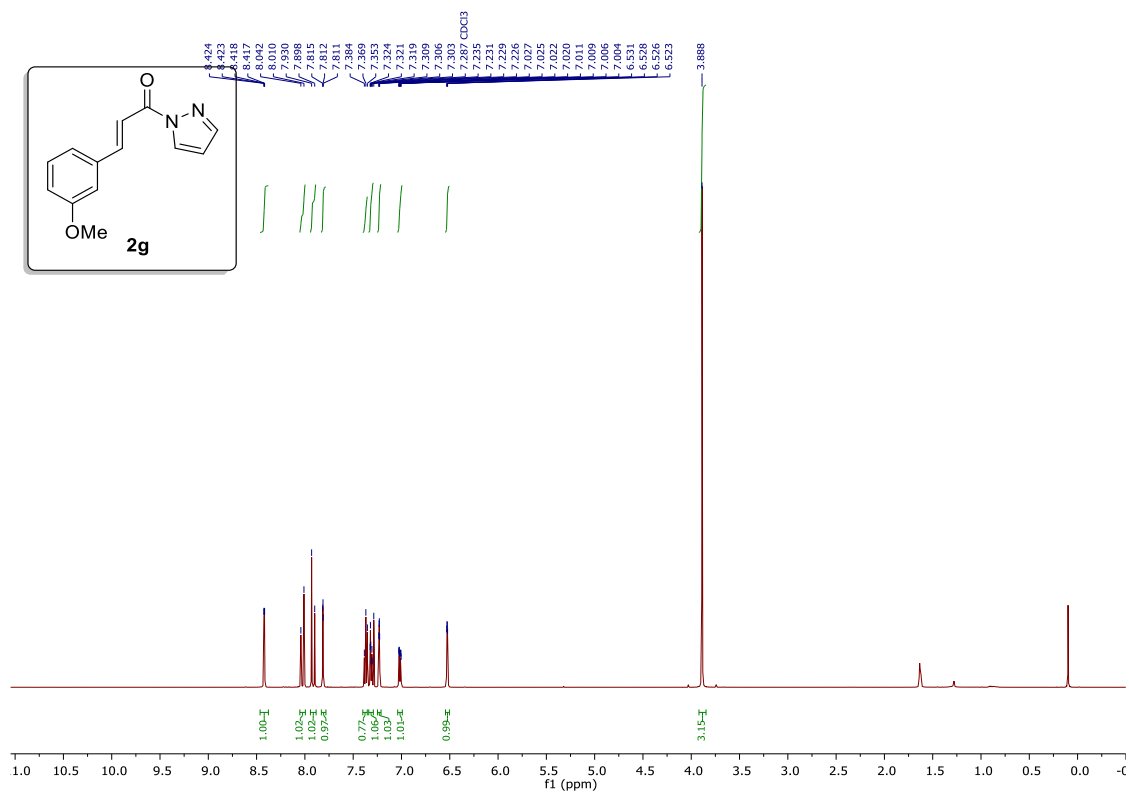

<sup>1</sup>H NMR (500 MHz, CDCl<sub>3</sub>) of compound **2g**

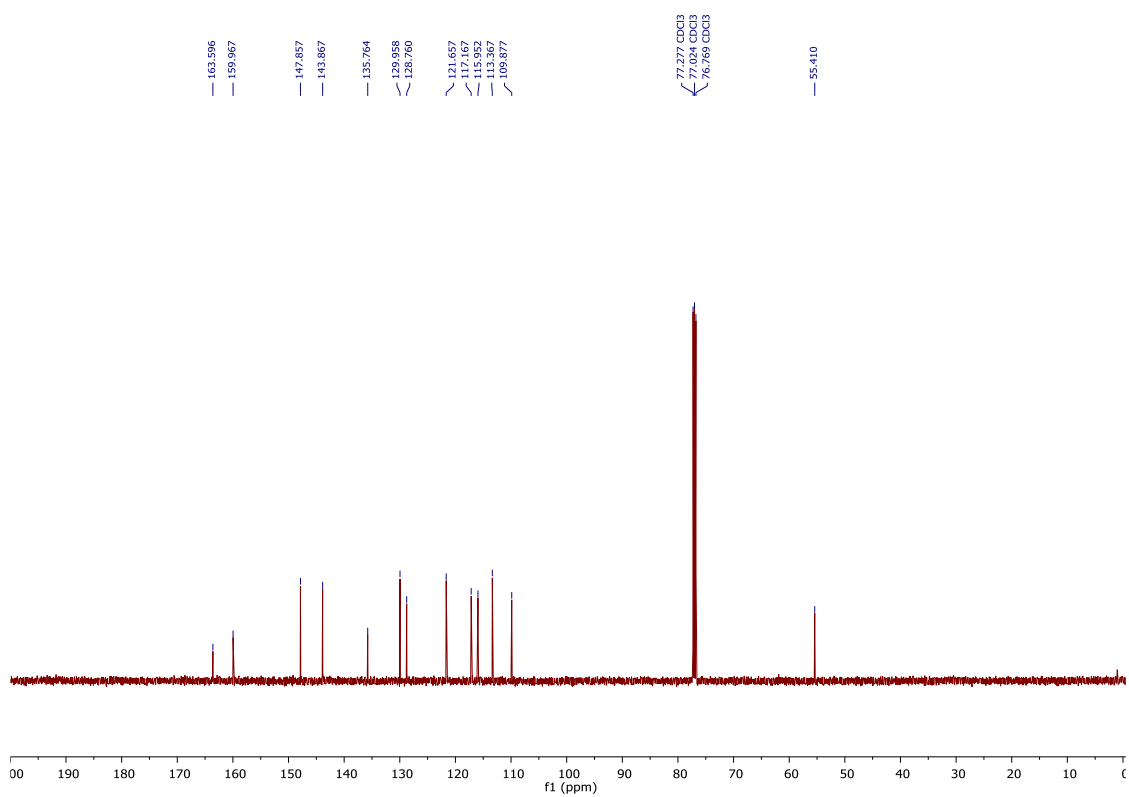

<sup>13</sup>C NMR (125 MHz, CDCl<sub>3</sub>) of compound **2g**



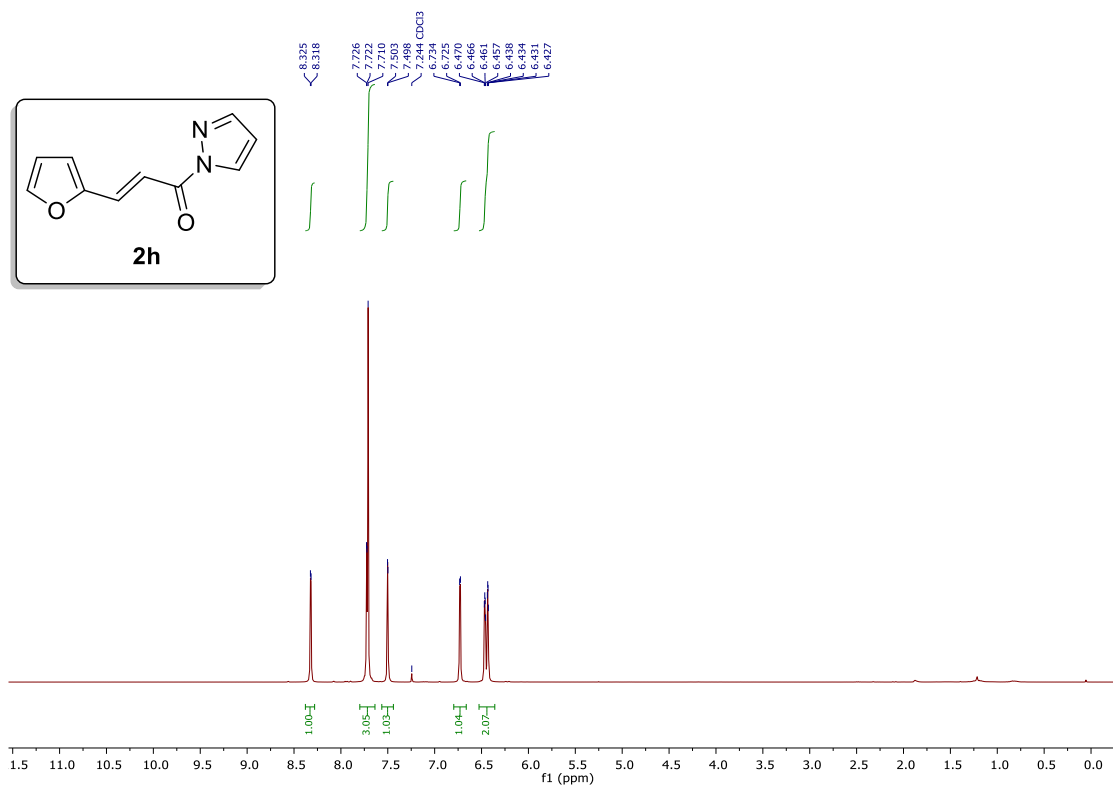

<sup>1</sup>H NMR (400 MHz, CDCl<sub>3</sub>) of compound **2h**

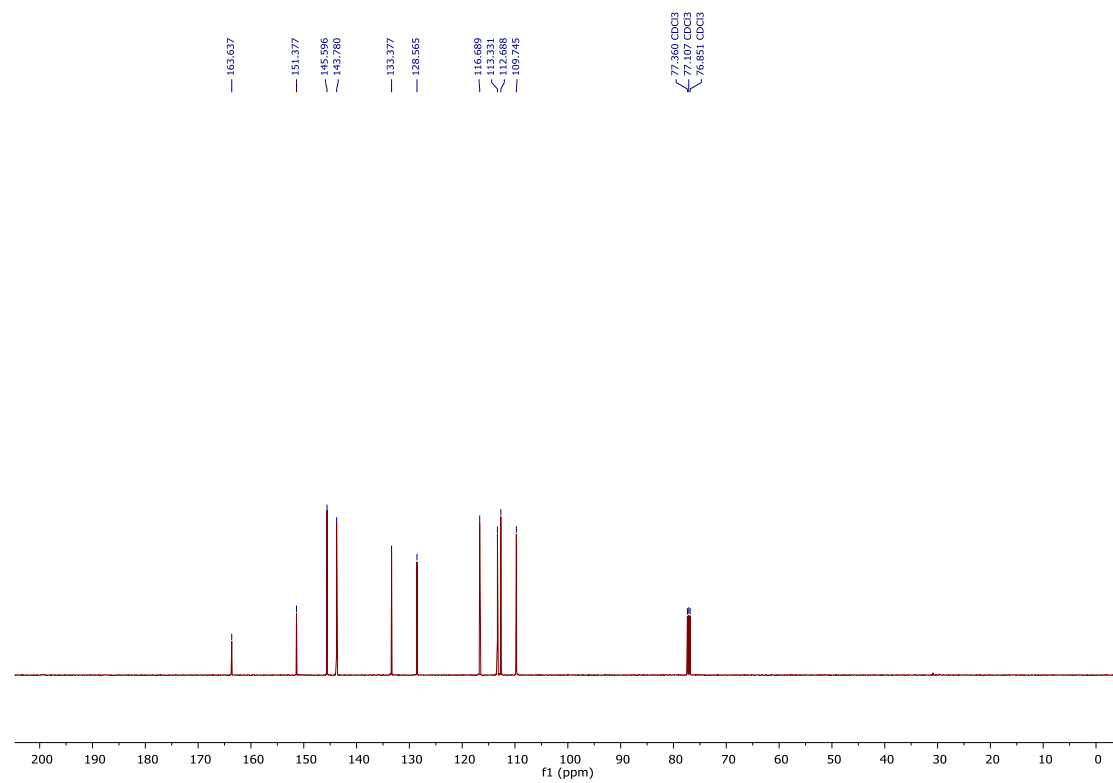

<sup>13</sup>C NMR (125 MHz, CDCl<sub>3</sub>) of compound **2h**

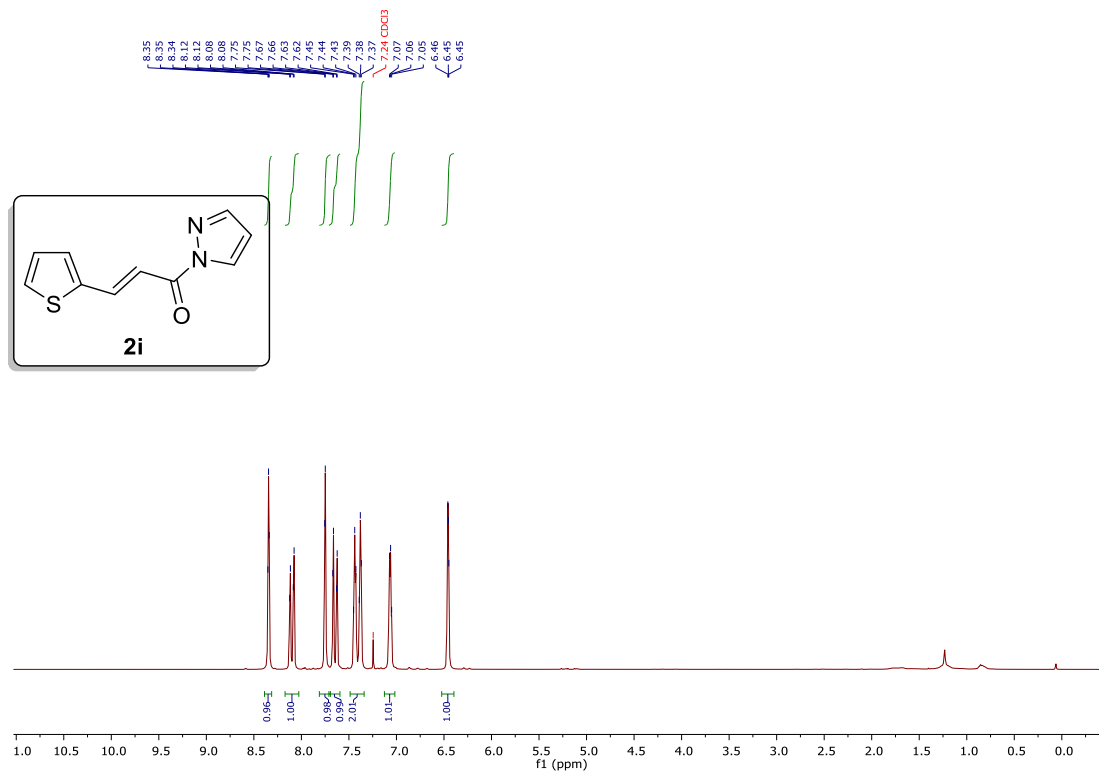

<sup>1</sup>H NMR (400 MHz, CDCl<sub>3</sub>) of compound **2j**

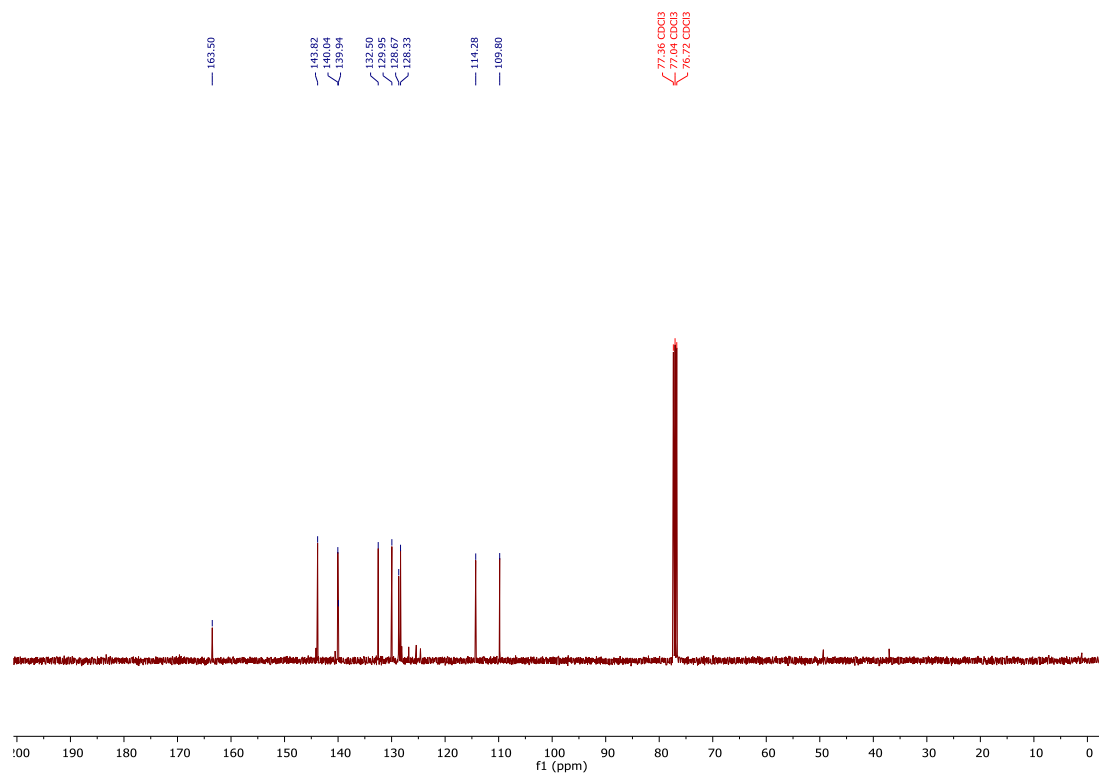

<sup>13</sup>C NMR (100 MHz, CDCl<sub>3</sub>) of compound **2j**

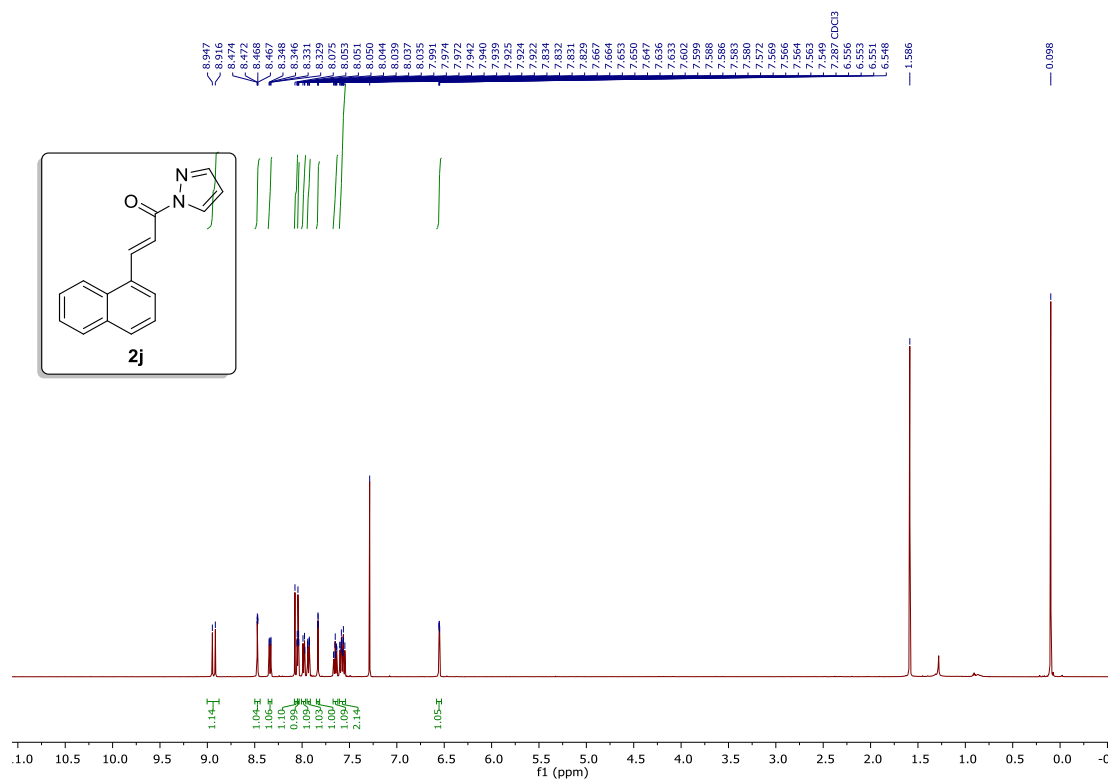

<sup>1</sup>H NMR (500 MHz, CDCl<sub>3</sub>) of compound **2j**

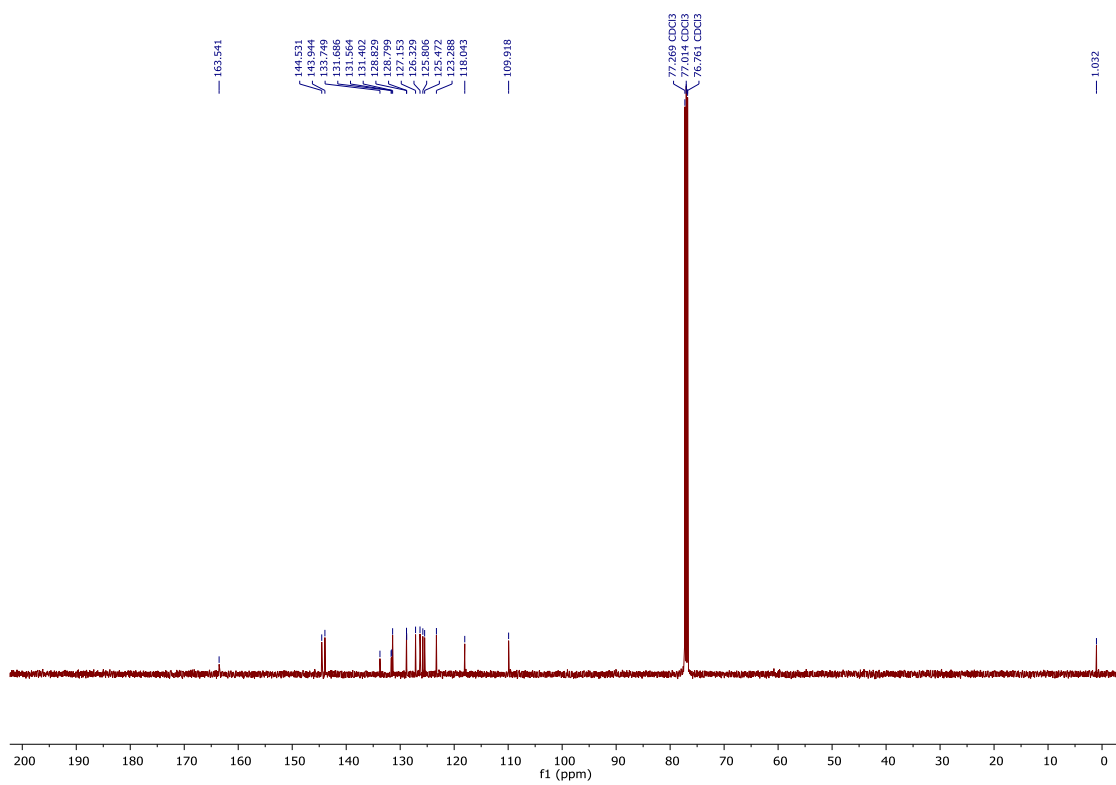

<sup>13</sup>C NMR (125 MHz, CDCl<sub>3</sub>) of compound **2j**

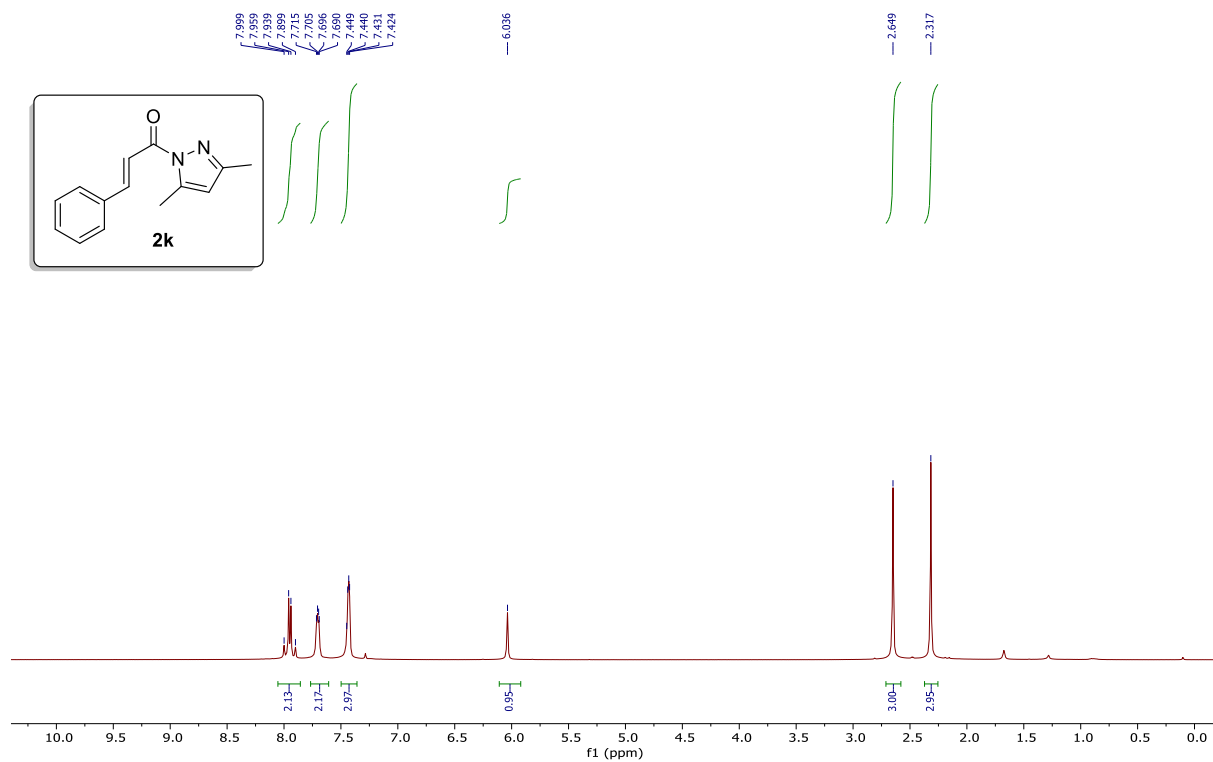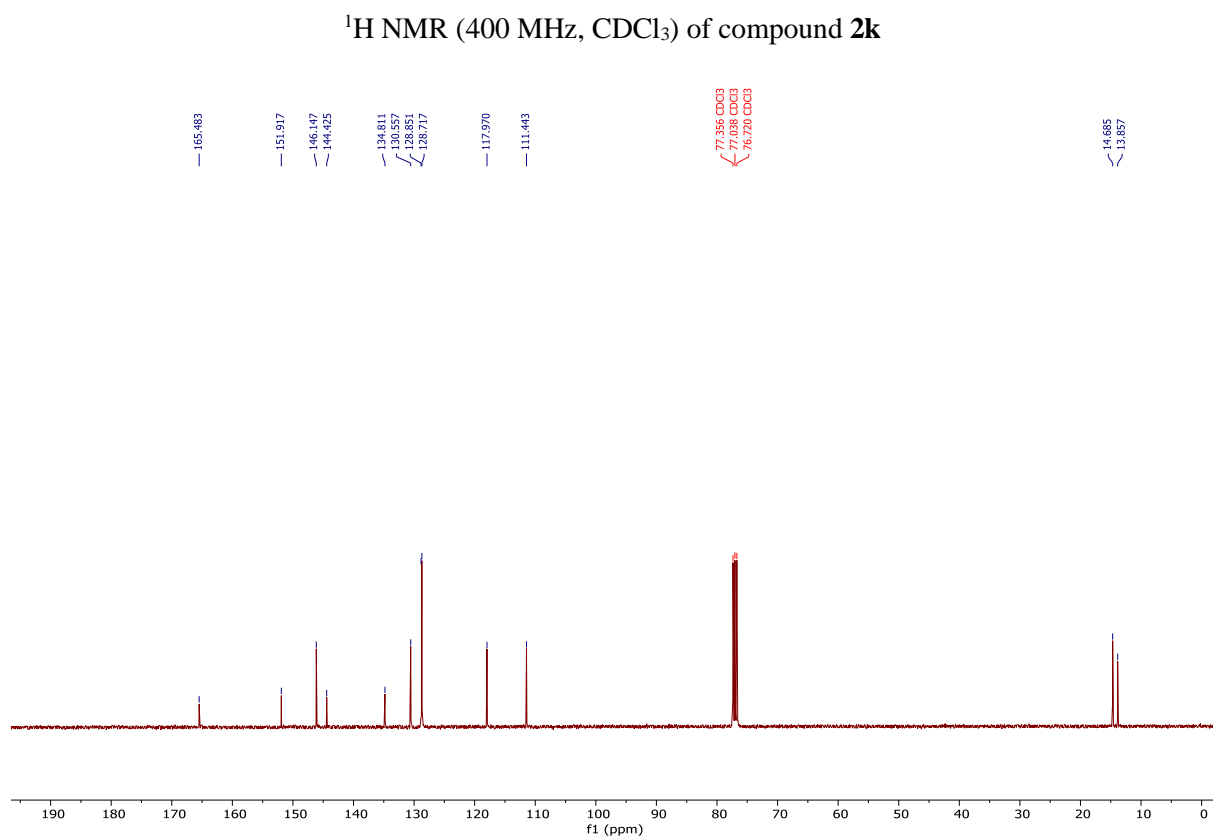

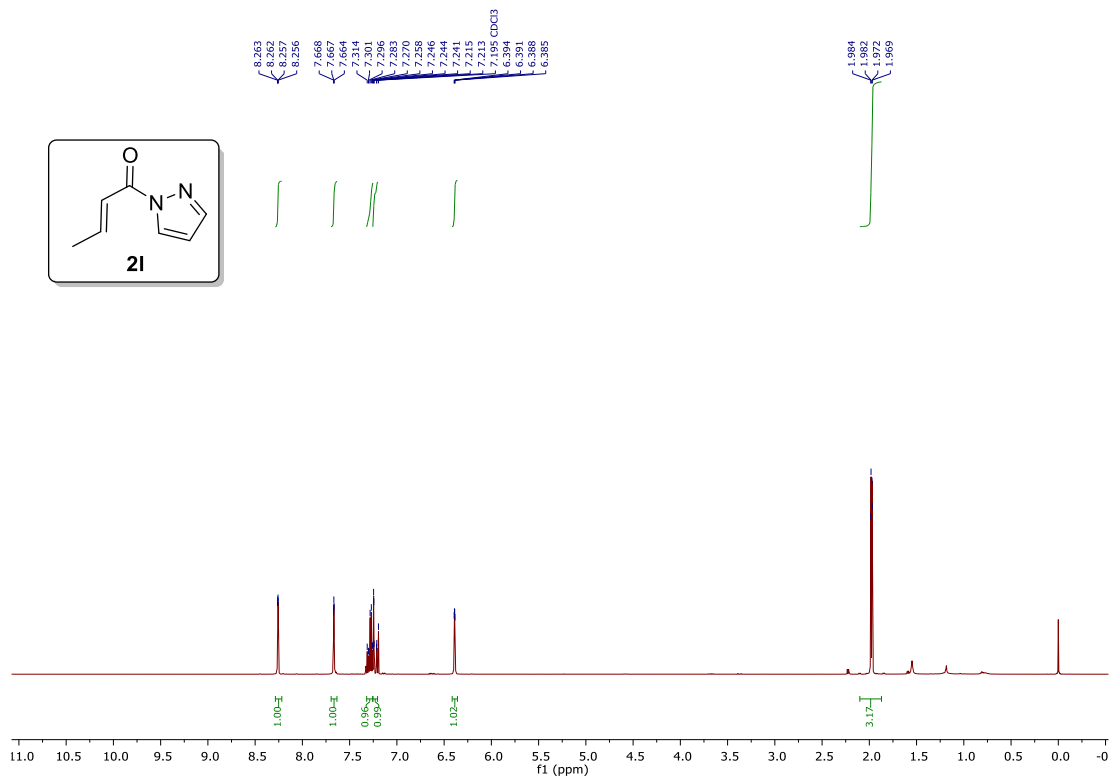

<sup>1</sup>H NMR (500 MHz, CDCl<sub>3</sub>) of compound **21**

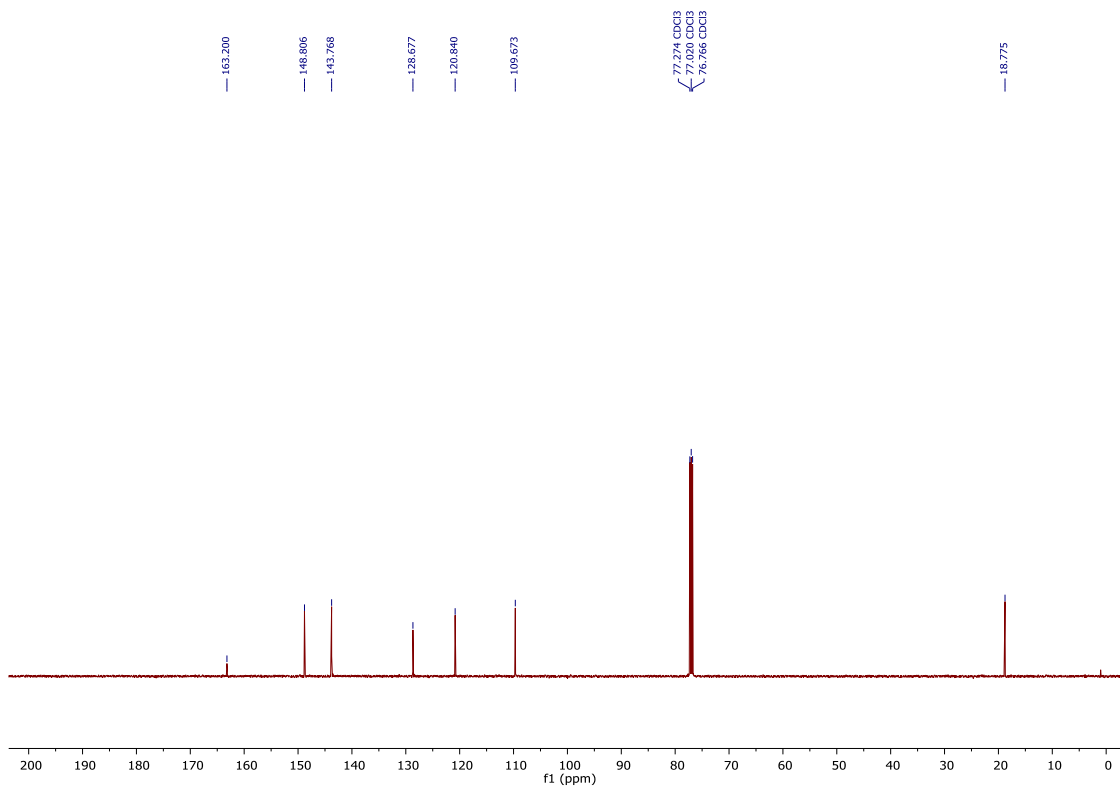

<sup>13</sup>C NMR (125 MHz, CDCl<sub>3</sub>) of compound **21**

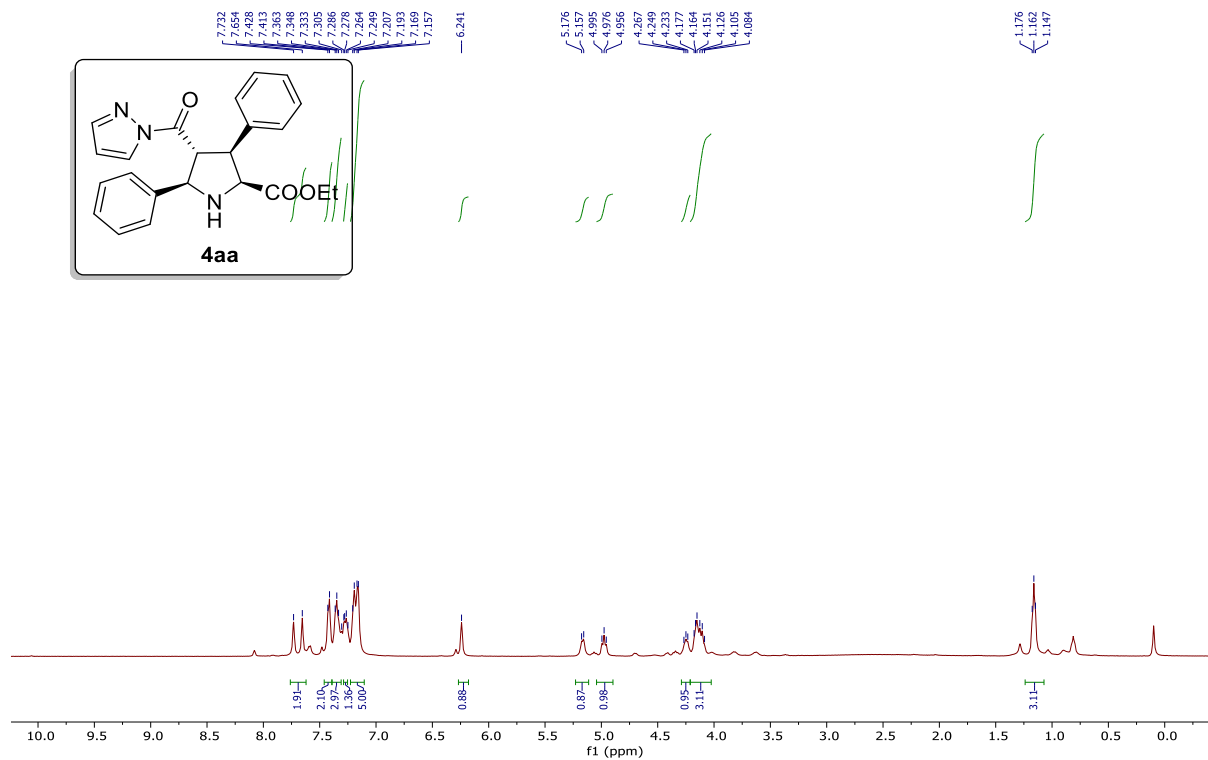

<sup>1</sup>H NMR (500 MHz, CDCl<sub>3</sub>) of compound **4aa**

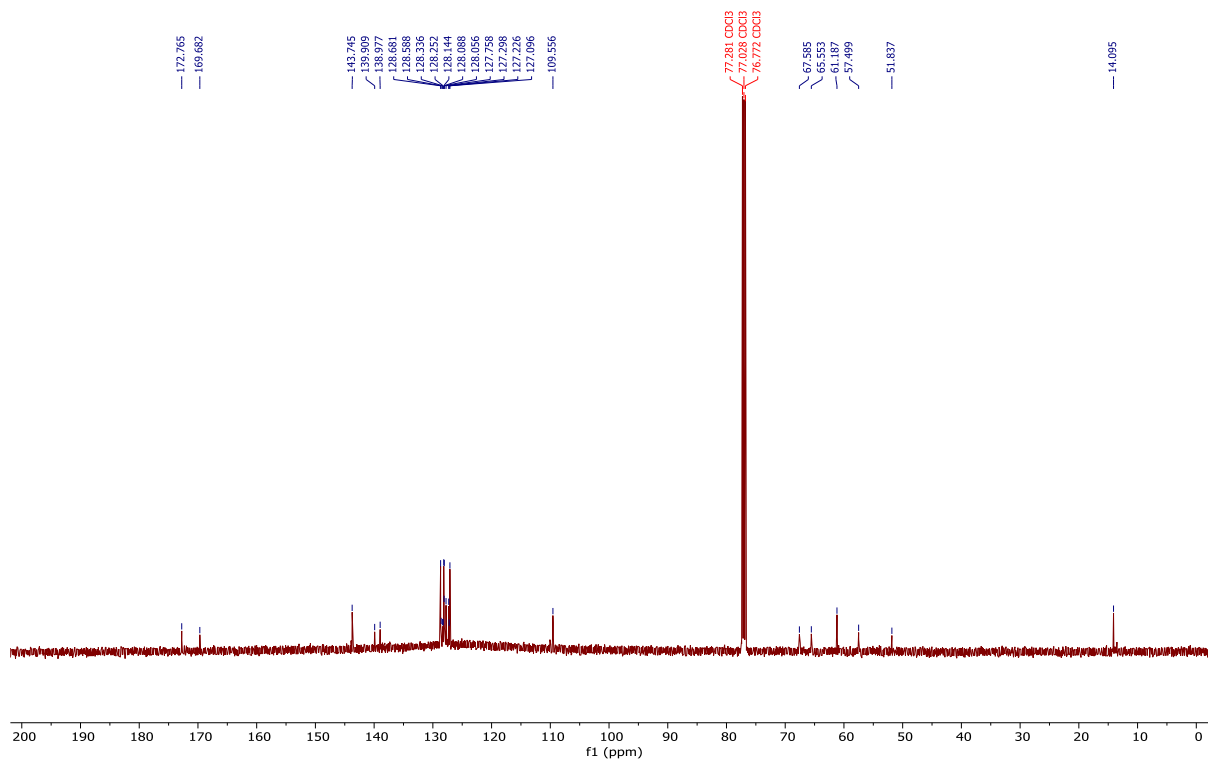

<sup>13</sup>C NMR (125 MHz, CDCl<sub>3</sub>) of compound **4aa**

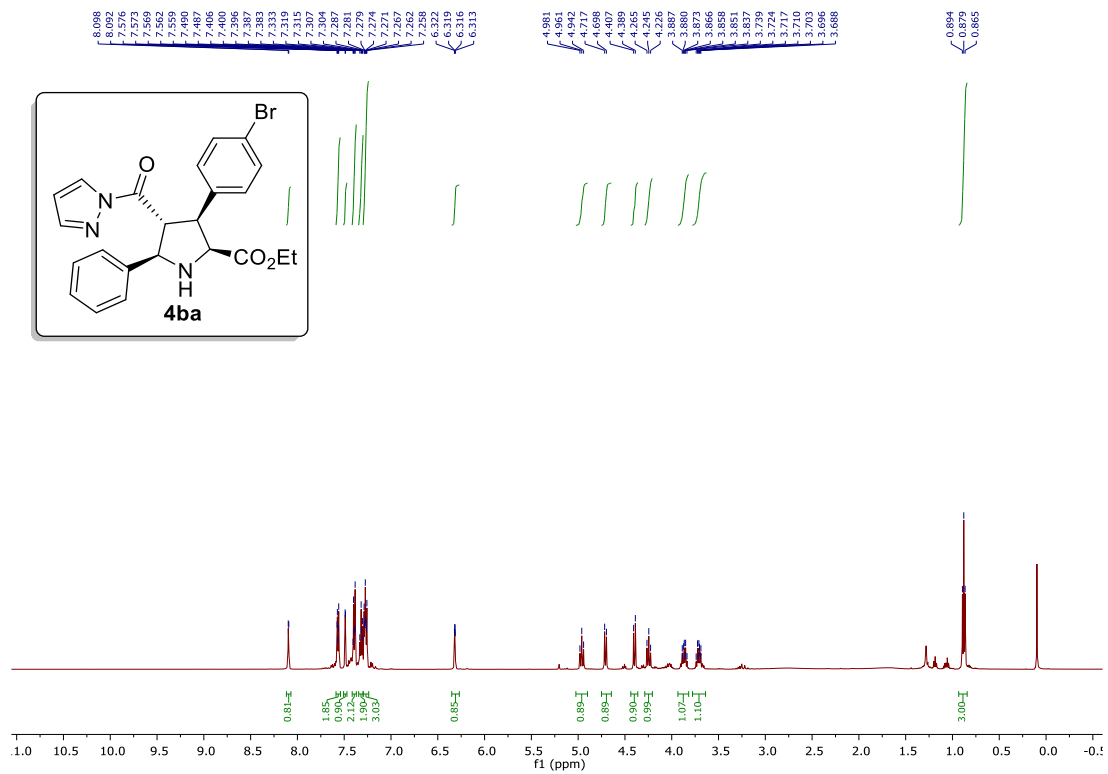

<sup>1</sup>H NMR (500 MHz, CDCl<sub>3</sub>) of compound **4ba**

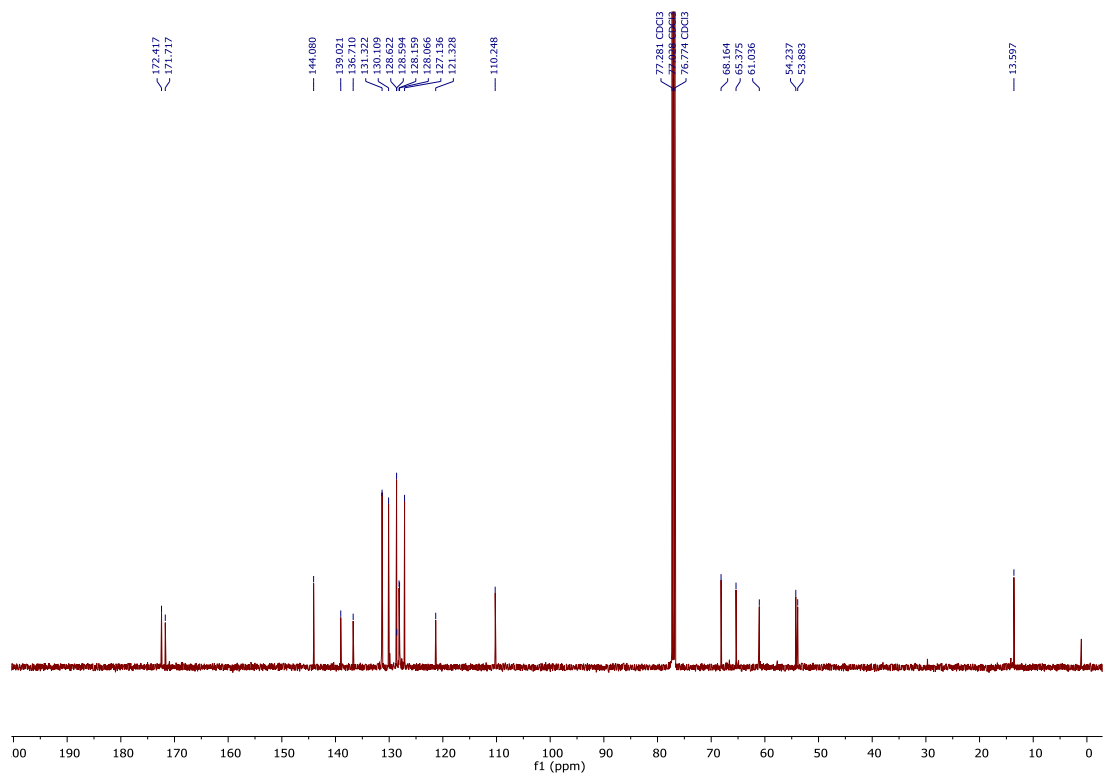

<sup>13</sup>C NMR (125 MHz, CDCl<sub>3</sub>) of compound **4ba**

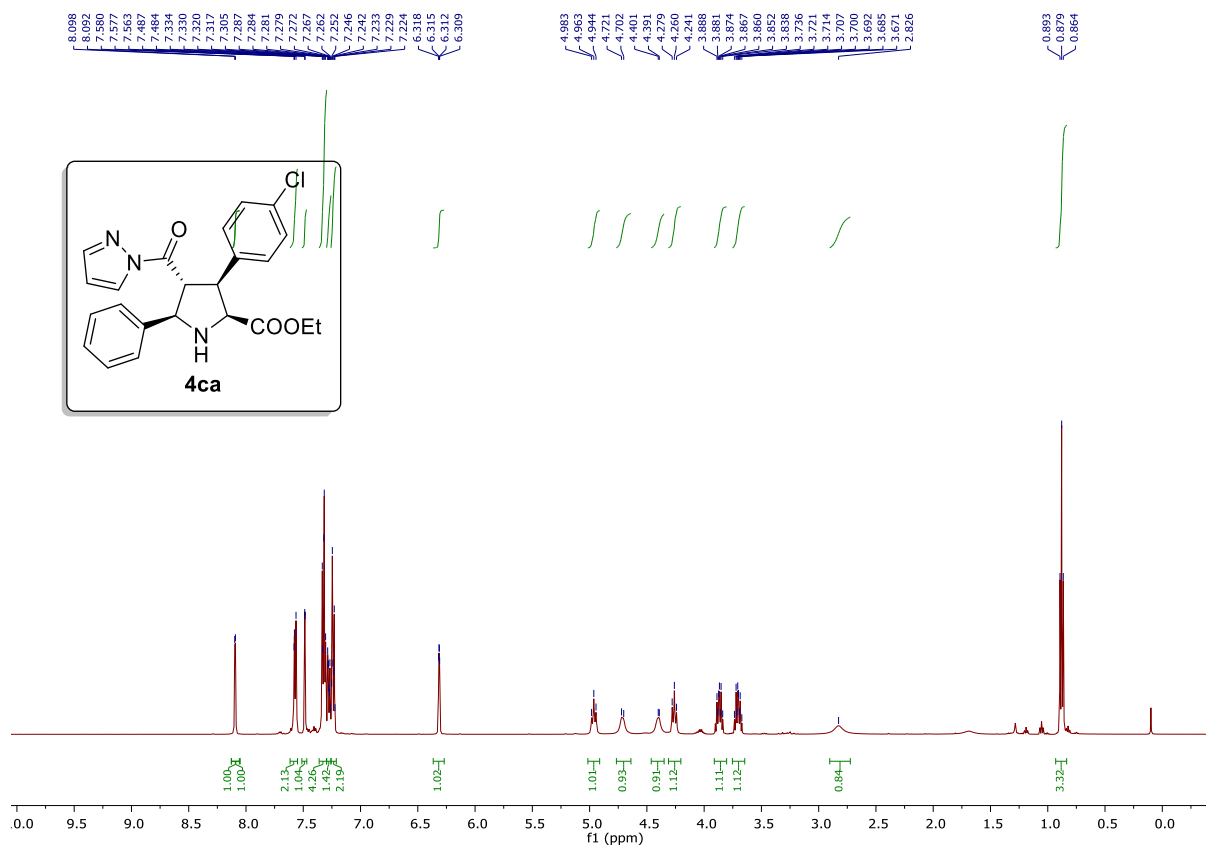

<sup>1</sup>H NMR (500 MHz, CDCl<sub>3</sub>) of compound **4ca**

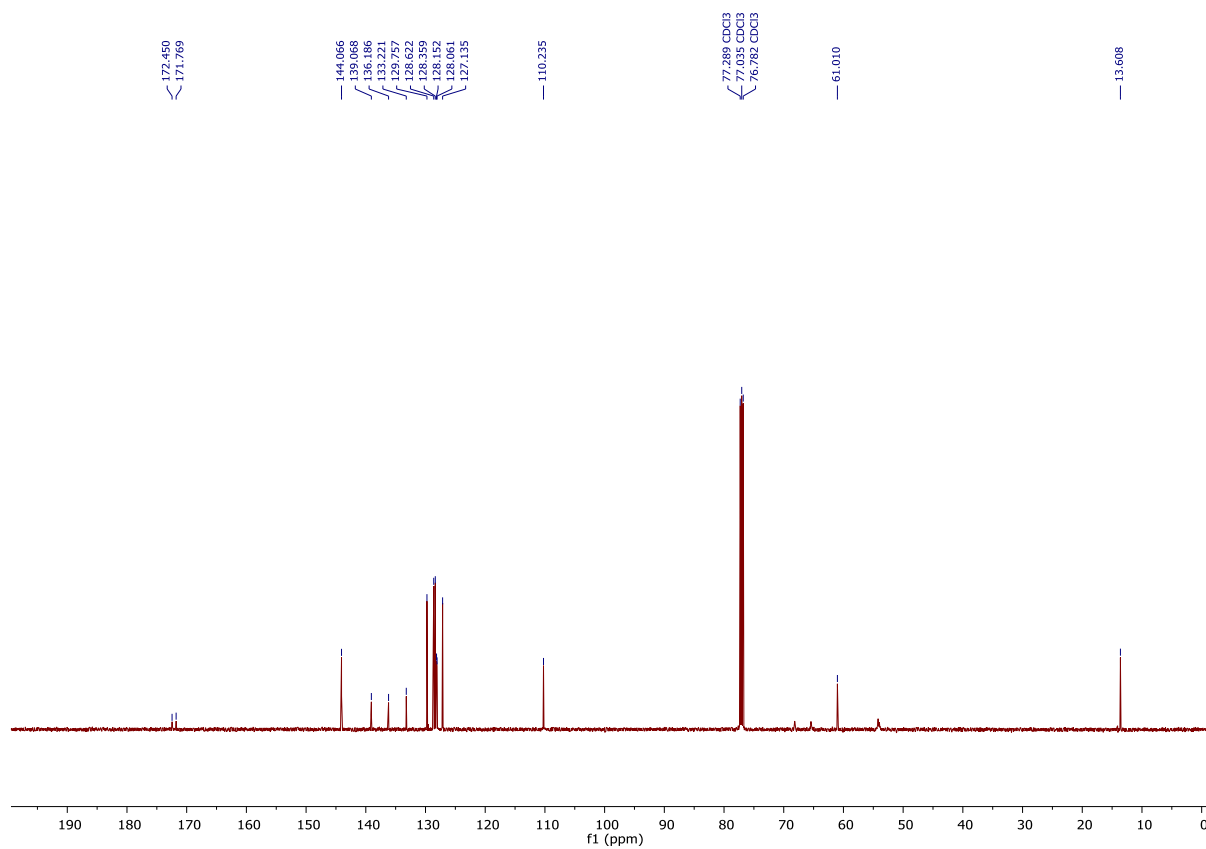

<sup>13</sup>C NMR (125 MHz, CDCl<sub>3</sub>) of compound **4ca**



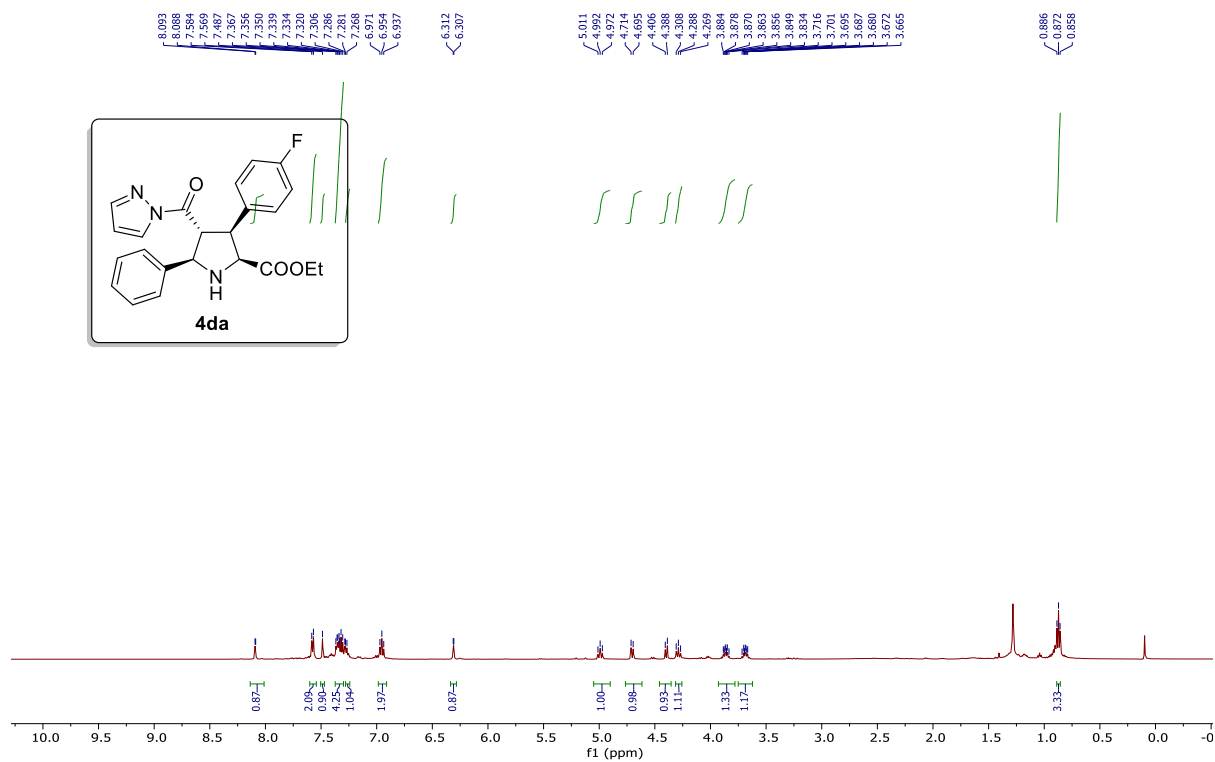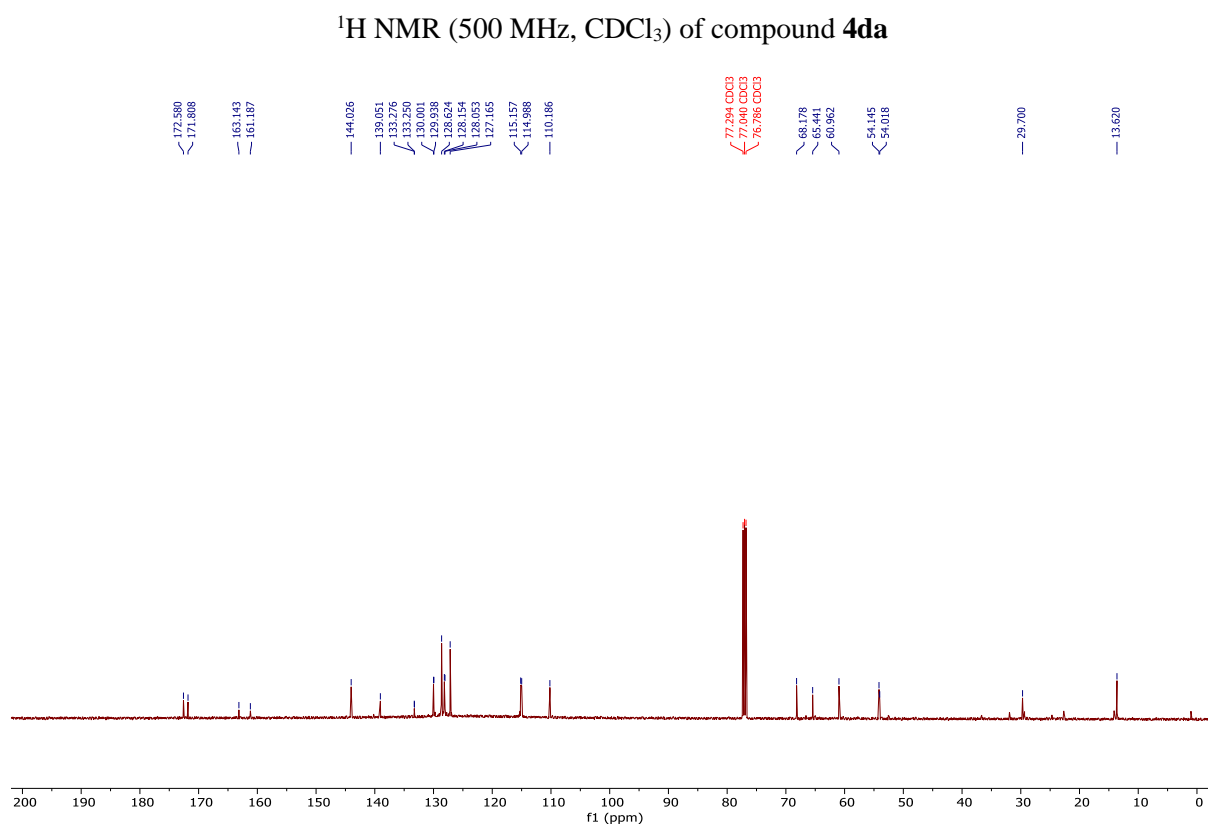

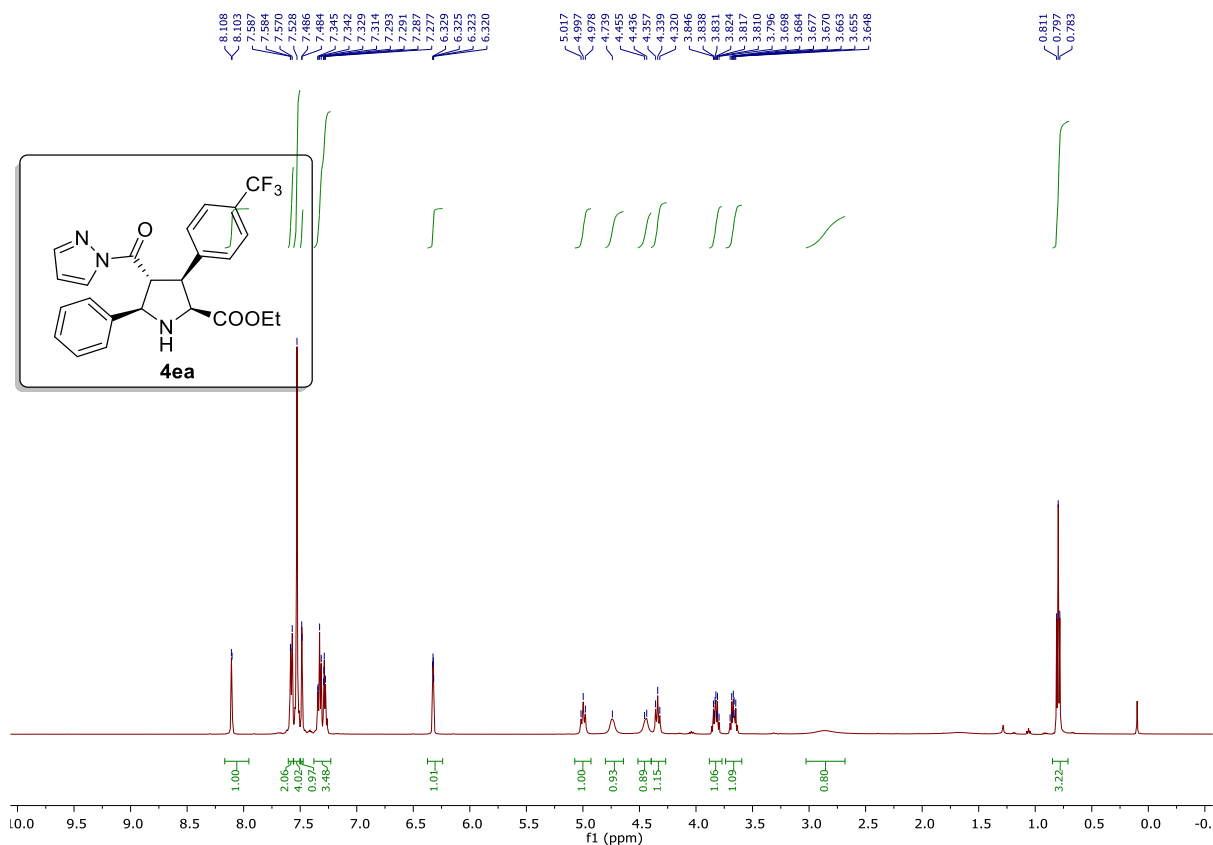

**<sup>1</sup>H NMR (500 MHz, CDCl<sub>3</sub>) of compound 4ea**

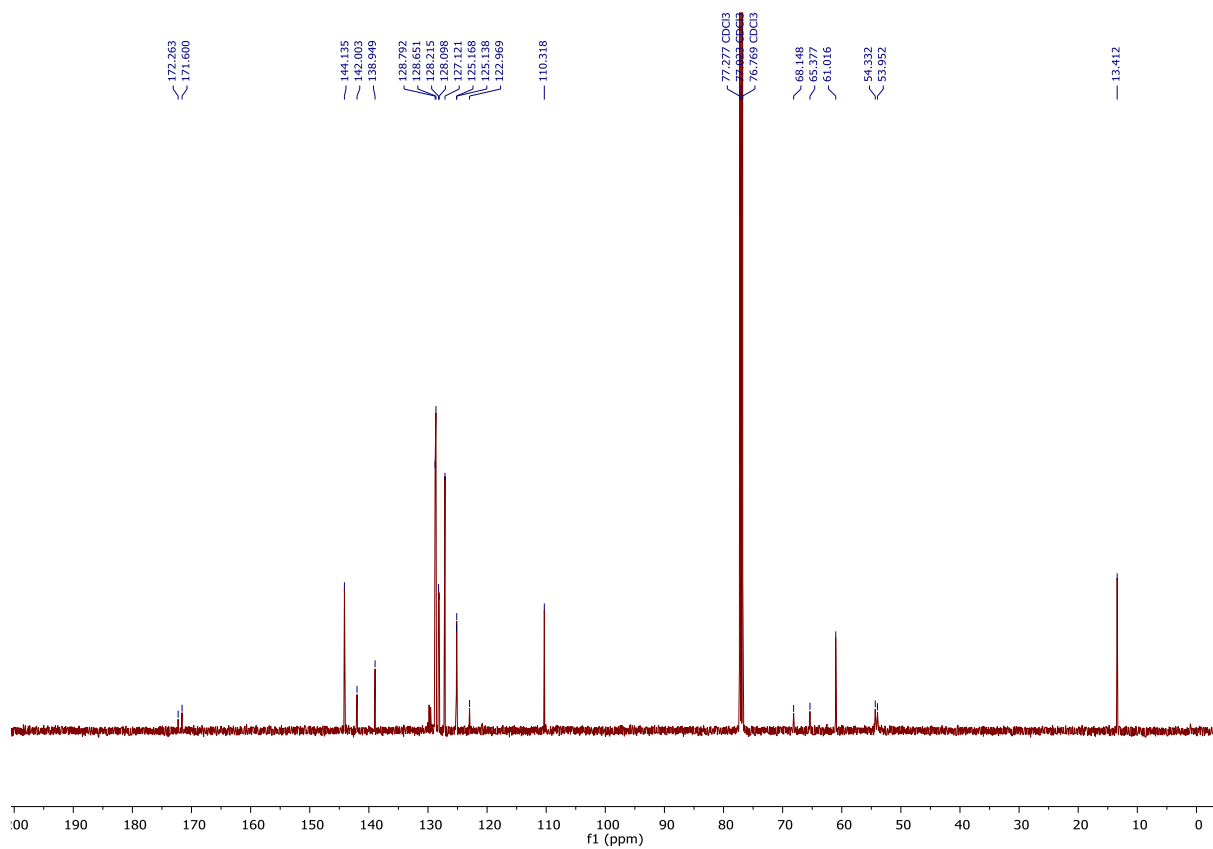

**<sup>13</sup>C NMR (125 MHz, CDCl<sub>3</sub>) of compound 4ea**

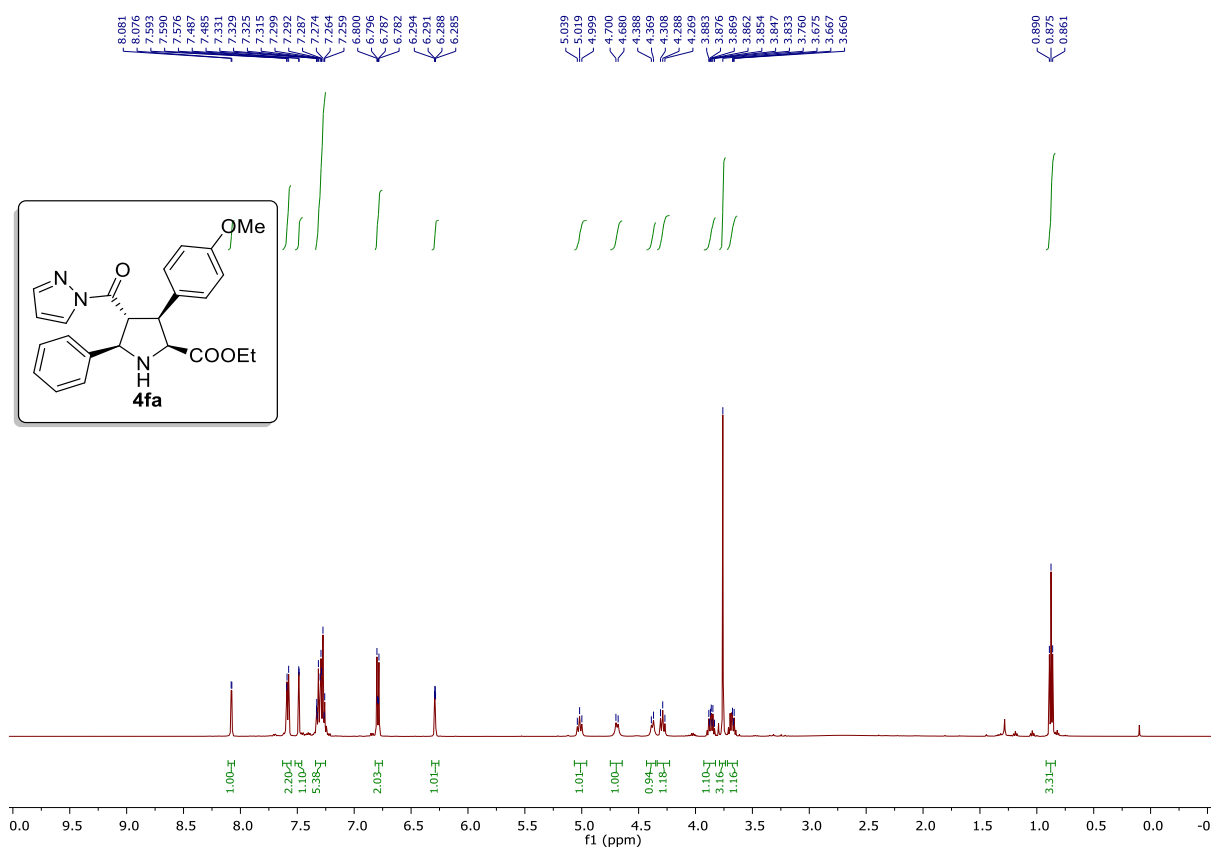

<sup>1</sup>H NMR (500 MHz, CDCl<sub>3</sub>) of compound **4fa**

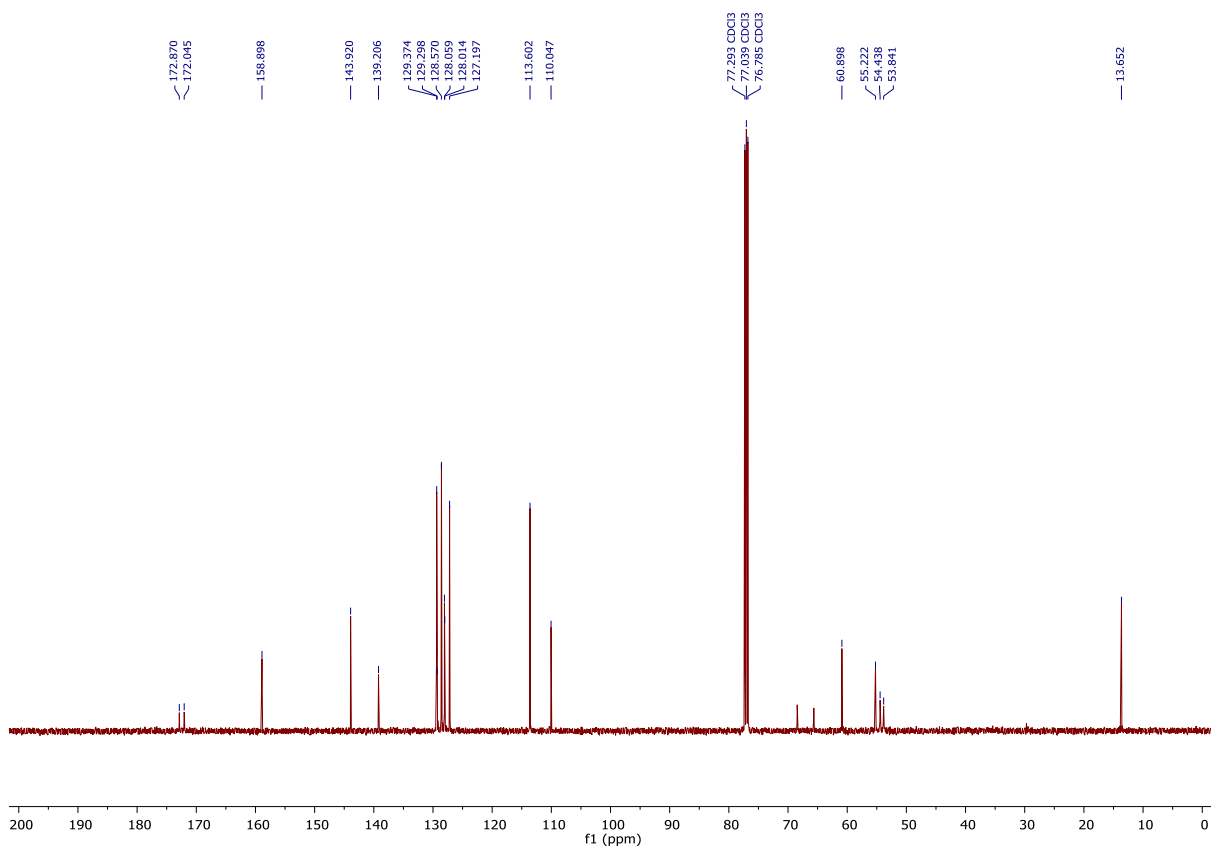

<sup>13</sup>C NMR (125 MHz, CDCl<sub>3</sub>) of compound **4fa**

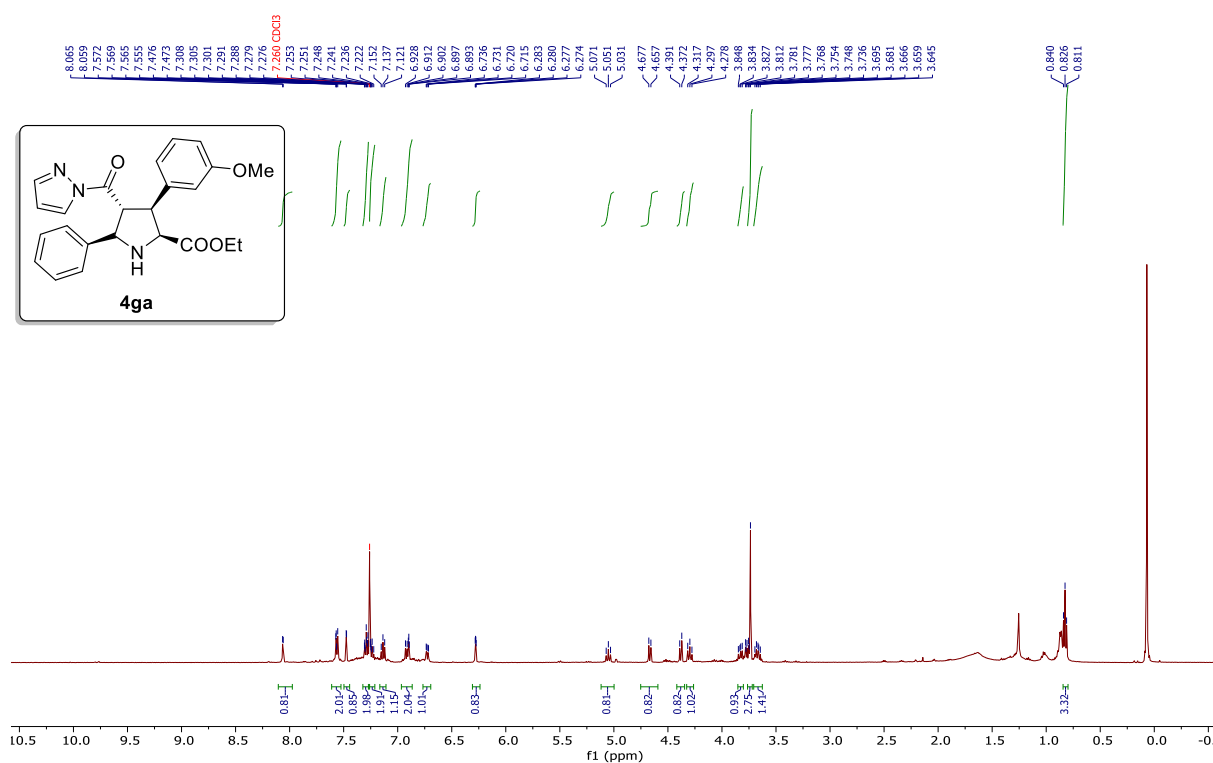

**<sup>1</sup>H NMR (500 MHz, CDCl<sub>3</sub>) of compound 4ga**

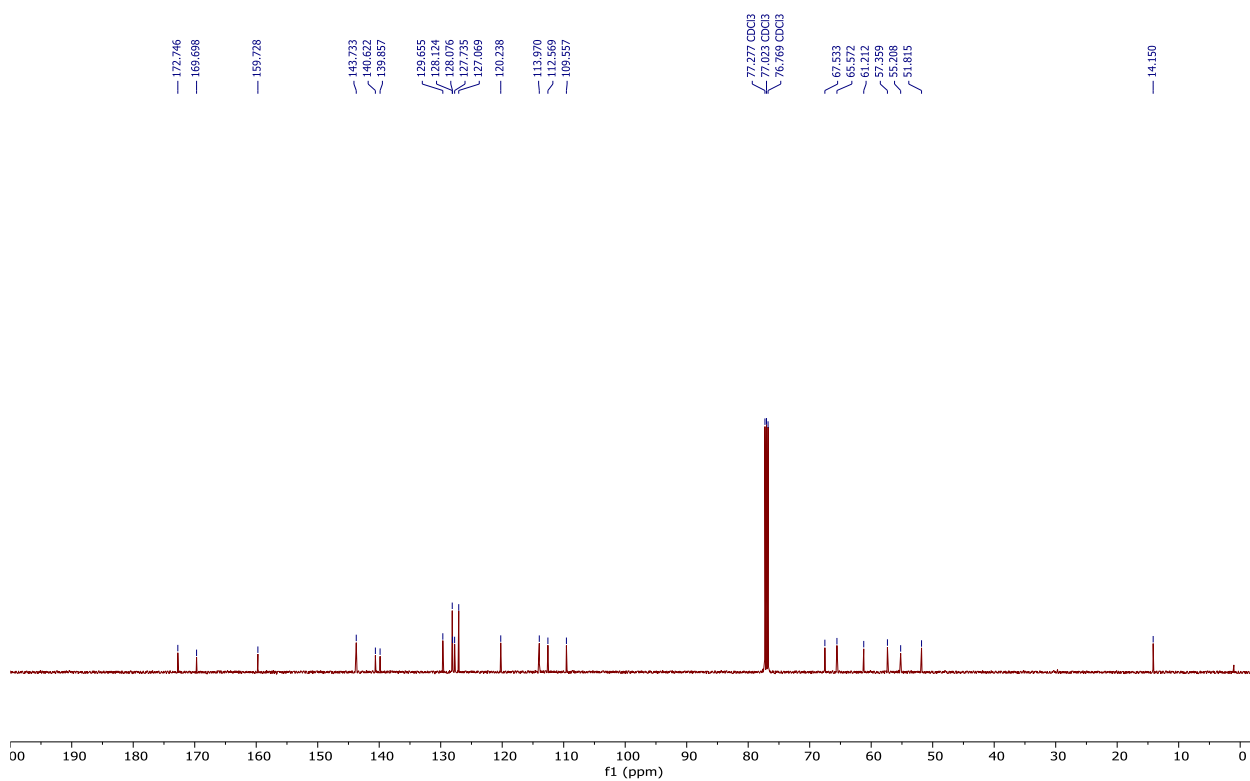

**<sup>13</sup>C NMR (125 MHz, CDCl<sub>3</sub>) of compound 4ga**

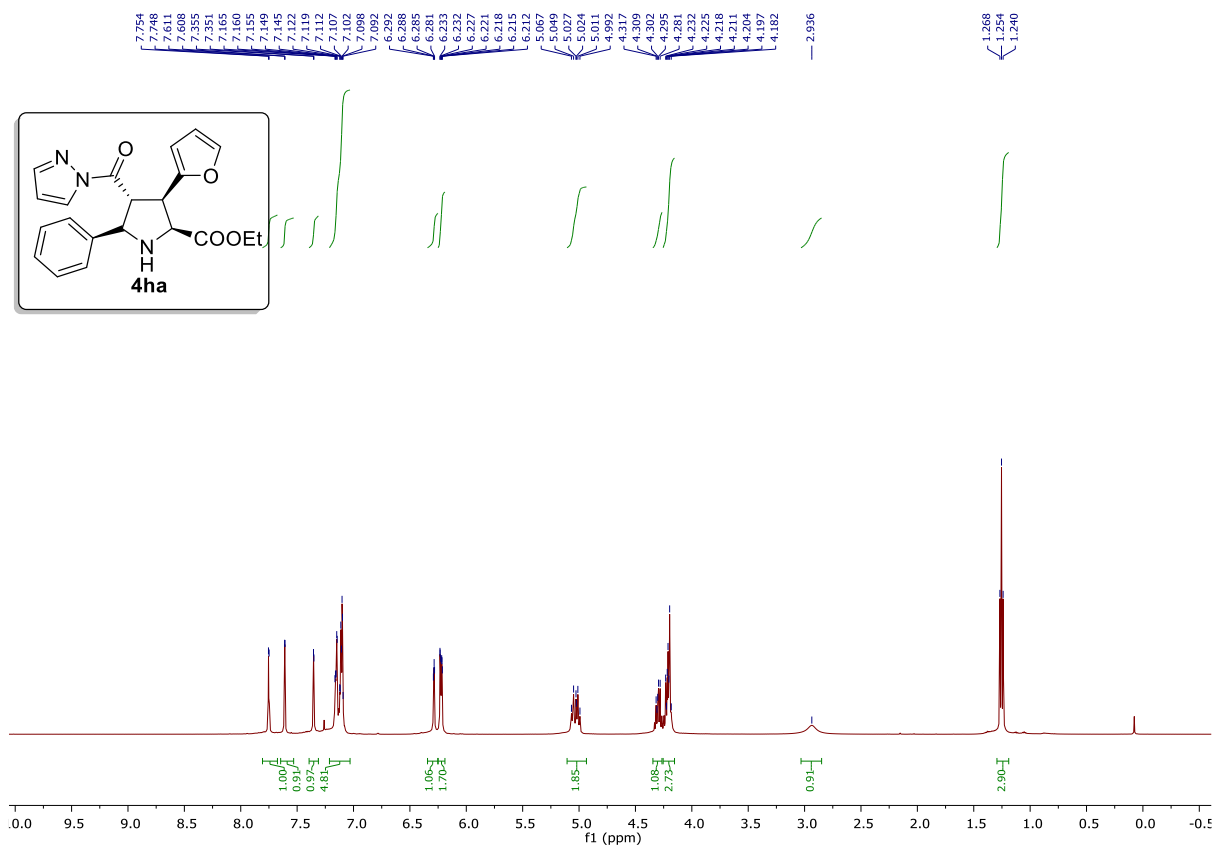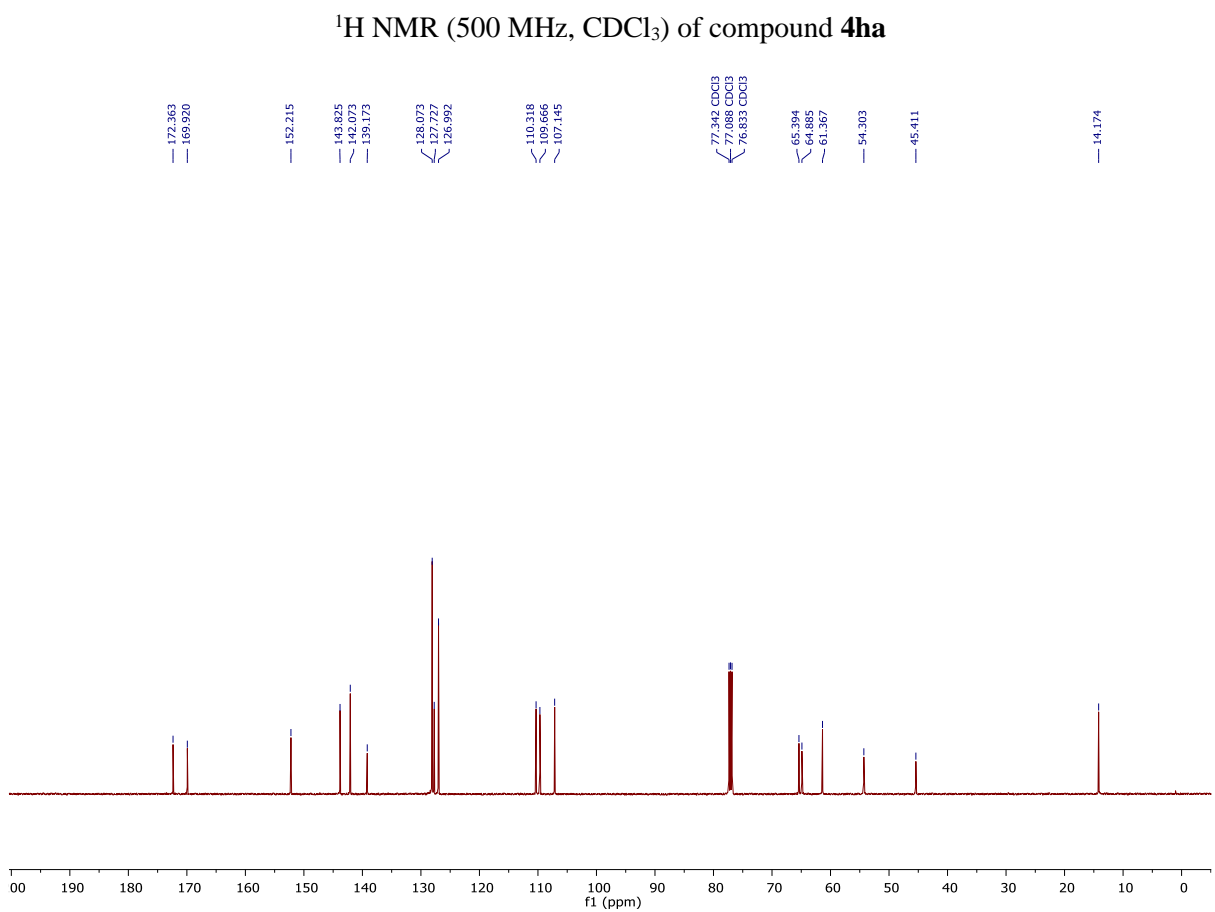

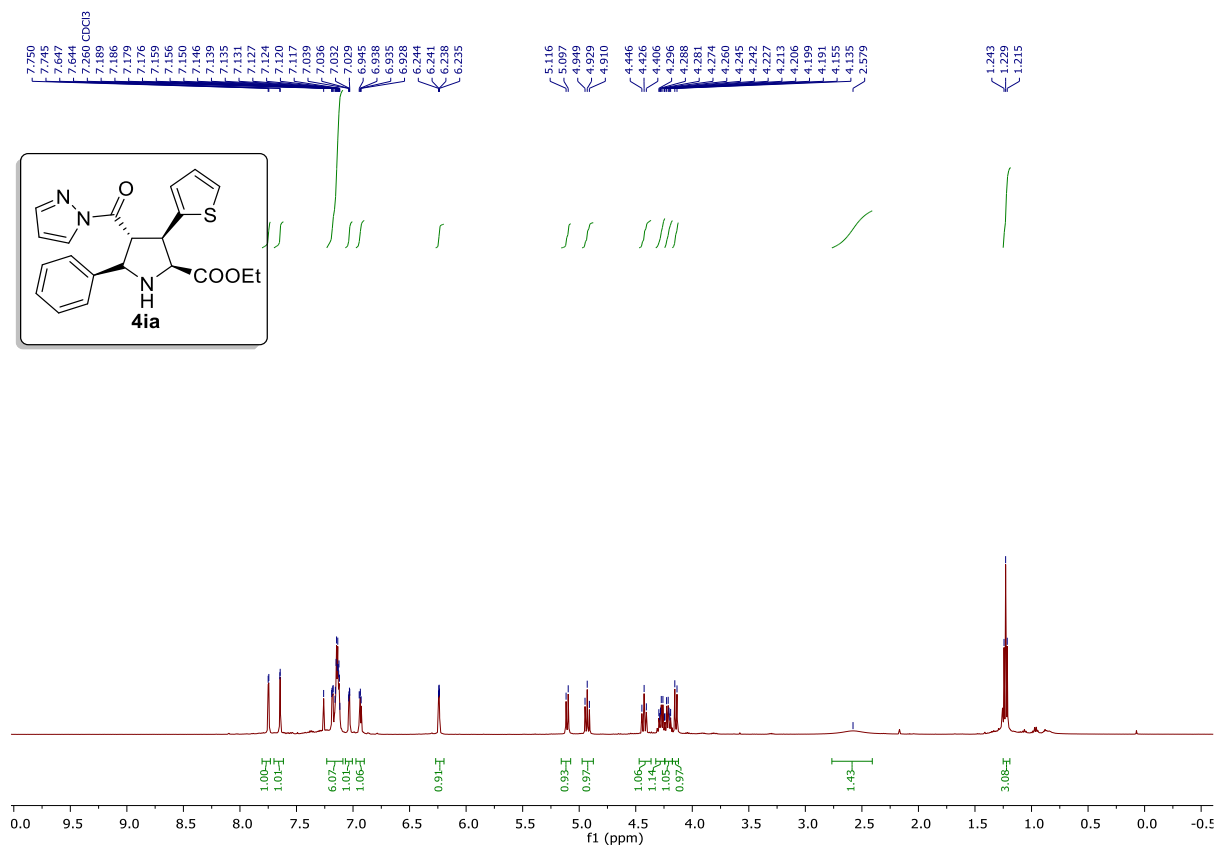

<sup>1</sup>H NMR (500 MHz, CDCl<sub>3</sub>) of compound **4ia**

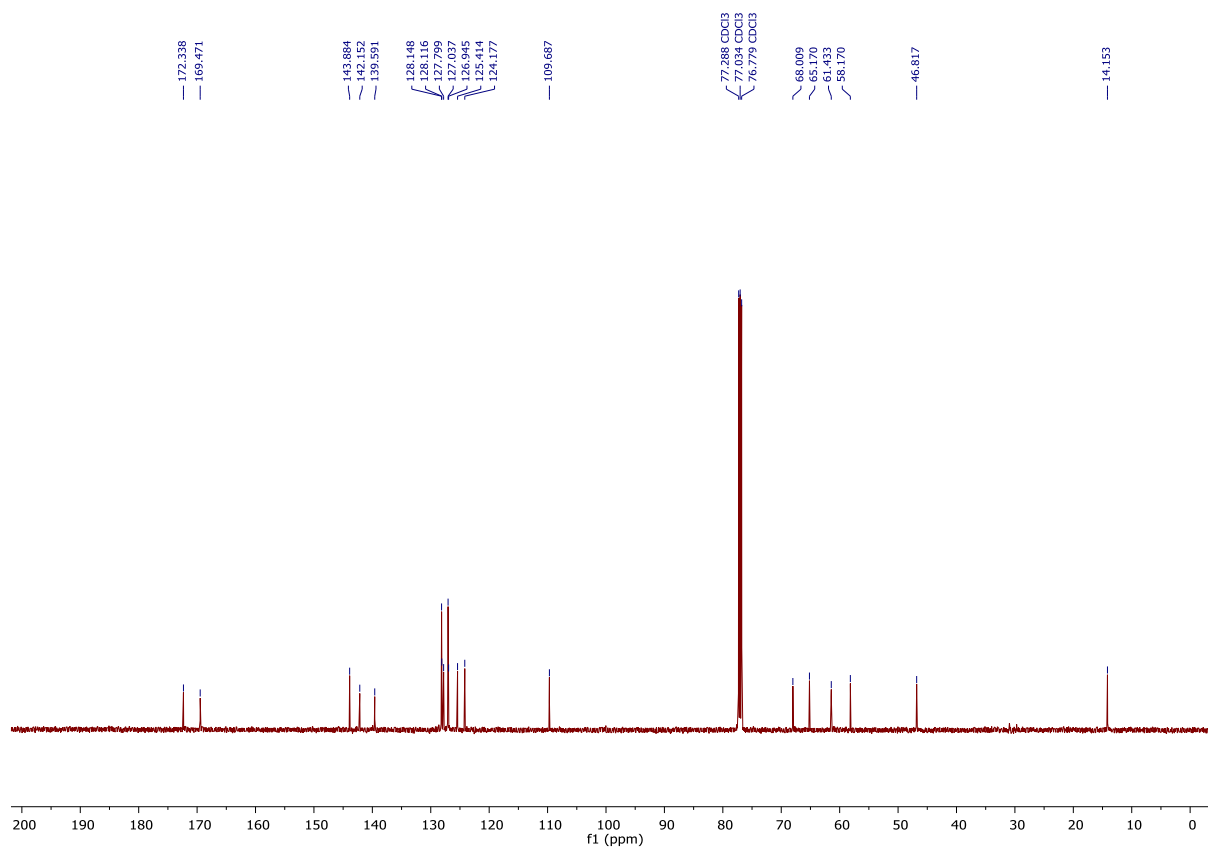

<sup>13</sup>C NMR (125 MHz, CDCl<sub>3</sub>) of compound **4ia**

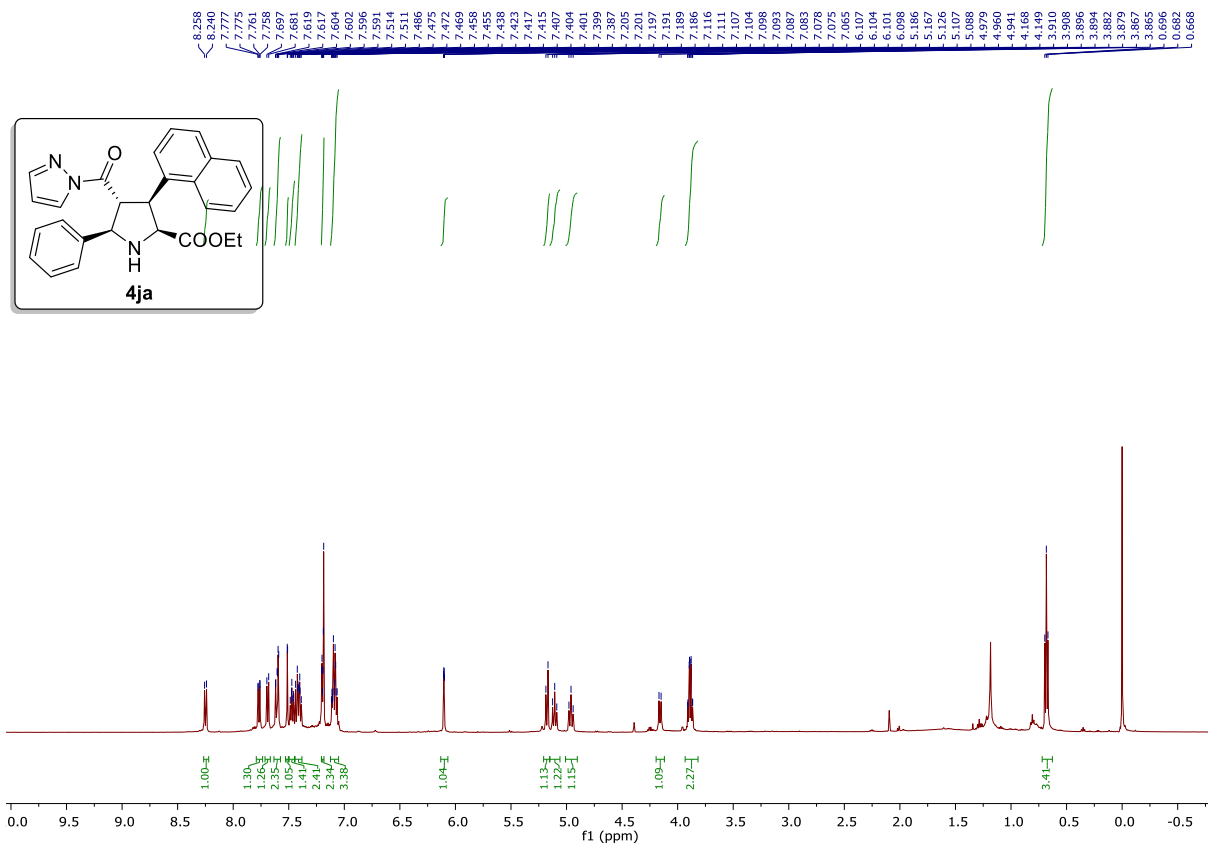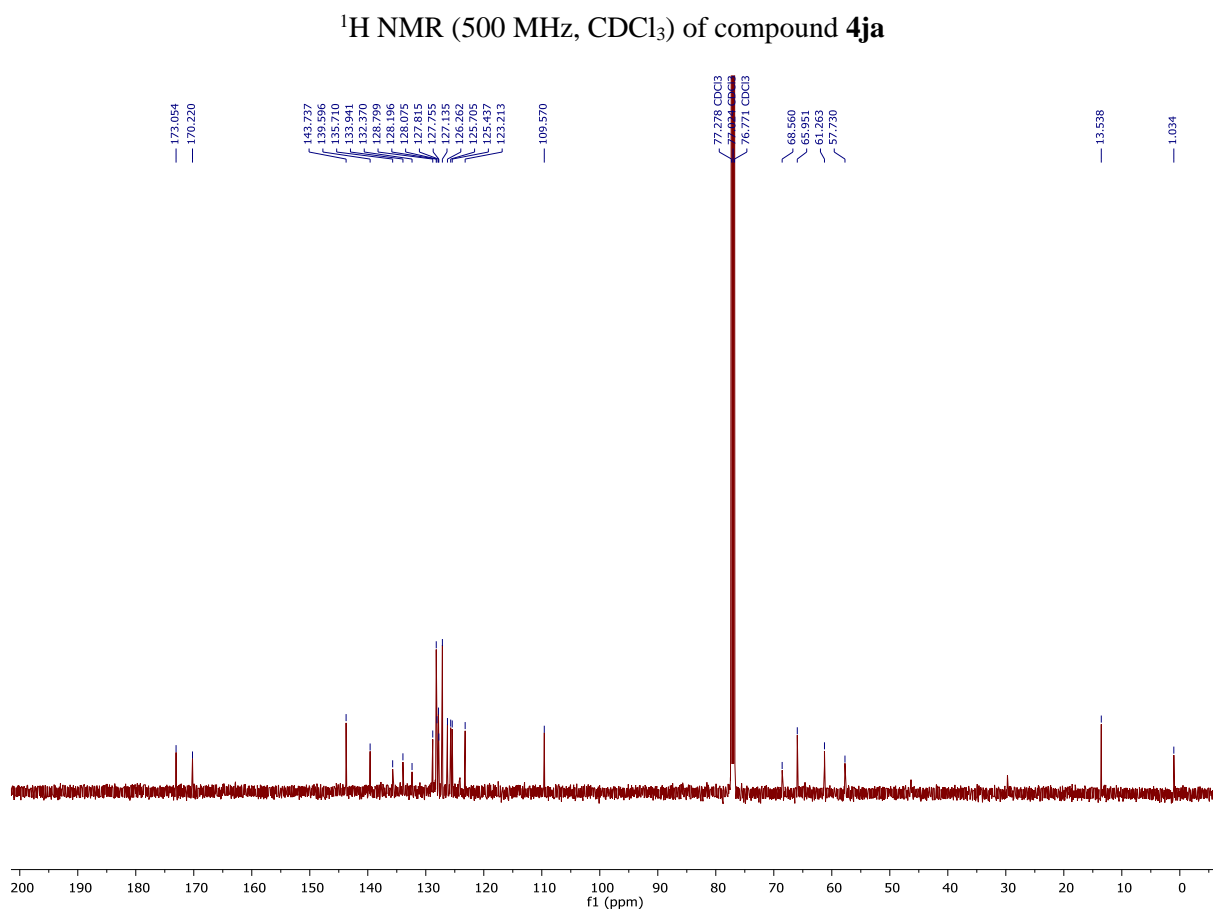

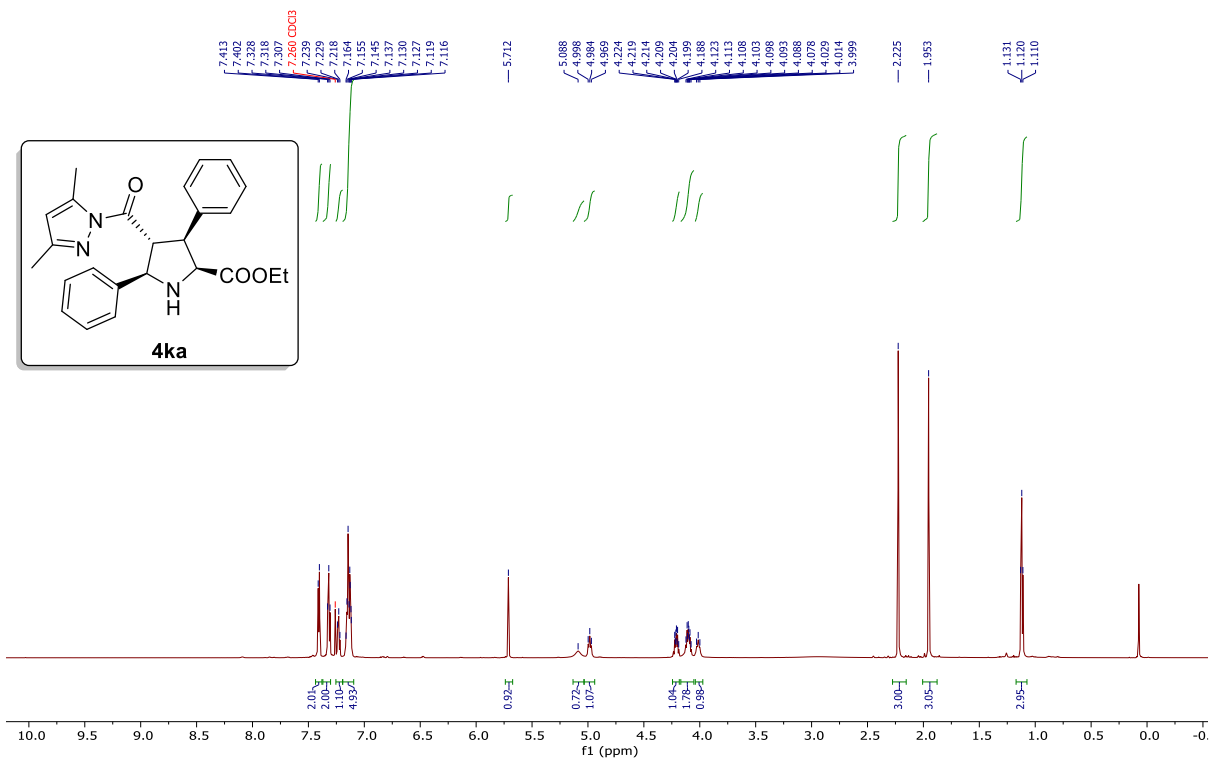

<sup>1</sup>H NMR (700 MHz, CDCl<sub>3</sub>) of compound **4ka**

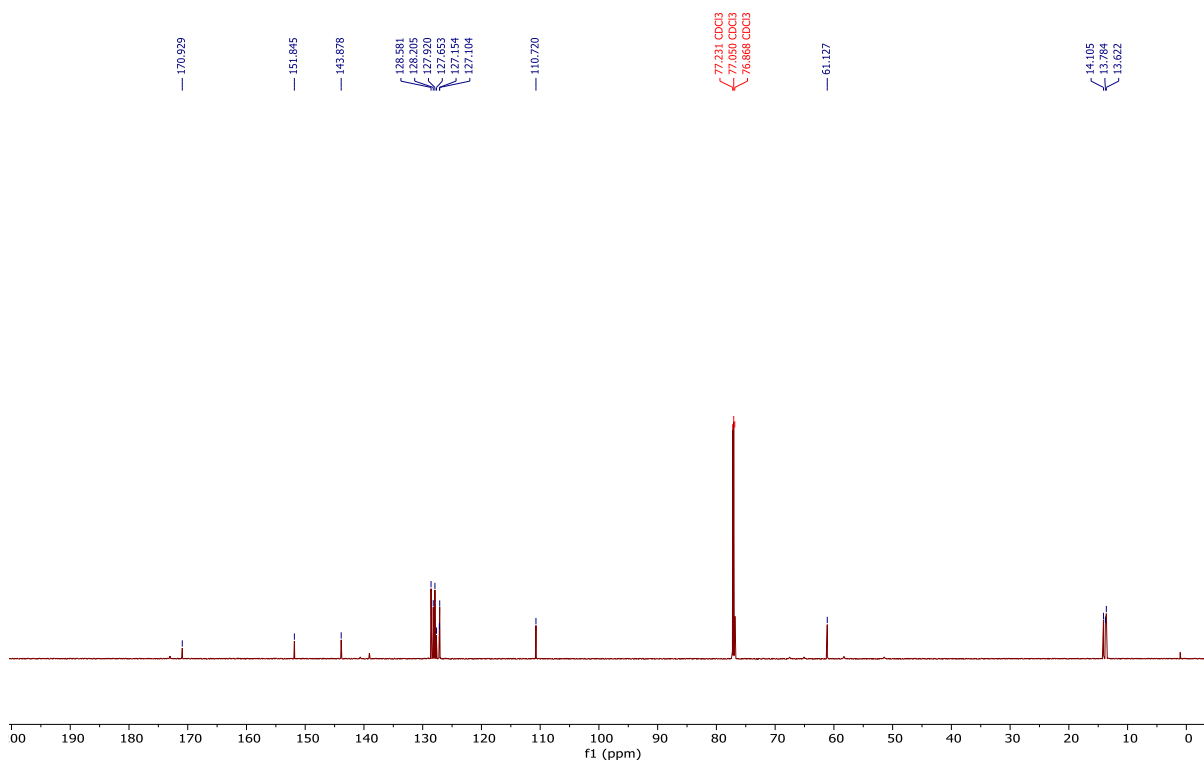

<sup>13</sup>C NMR (175 MHz, CDCl<sub>3</sub>) of compound **4ka**



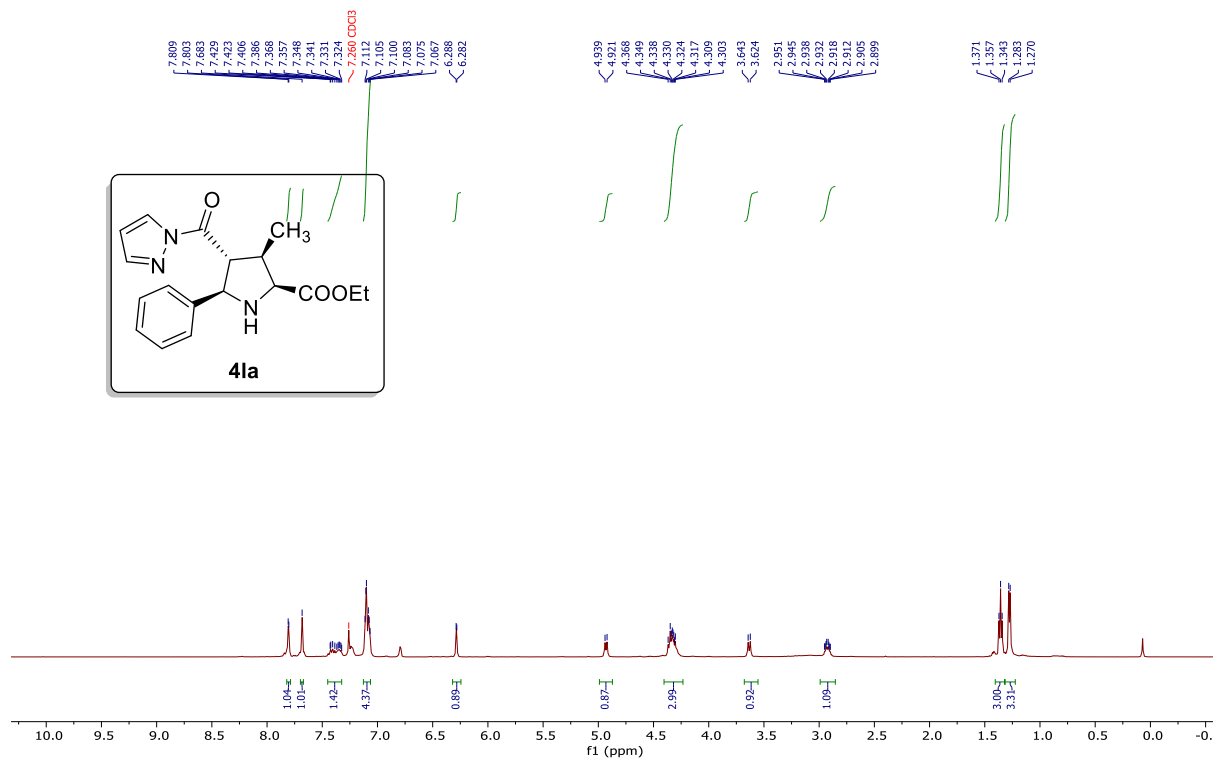

<sup>1</sup>H NMR (500 MHz, CDCl<sub>3</sub>) of compound **4la**

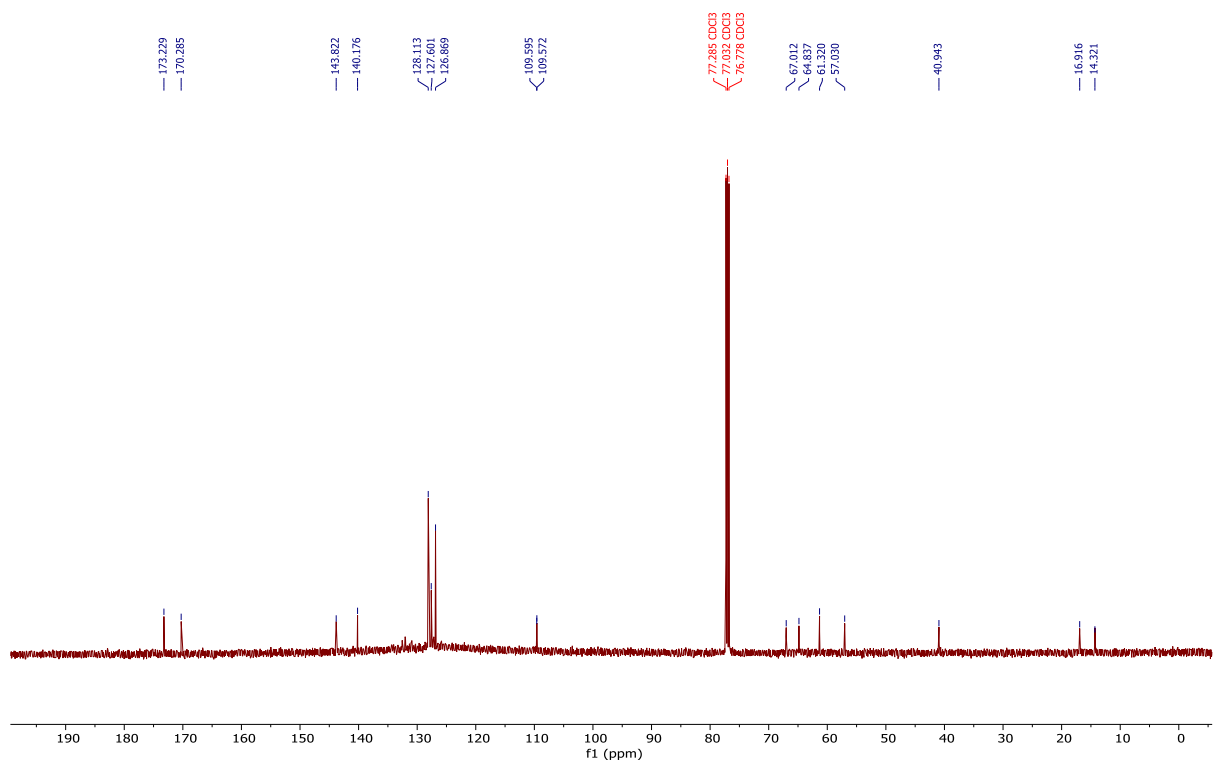

<sup>13</sup>C NMR (125 MHz, CDCl<sub>3</sub>) of compound **4la**

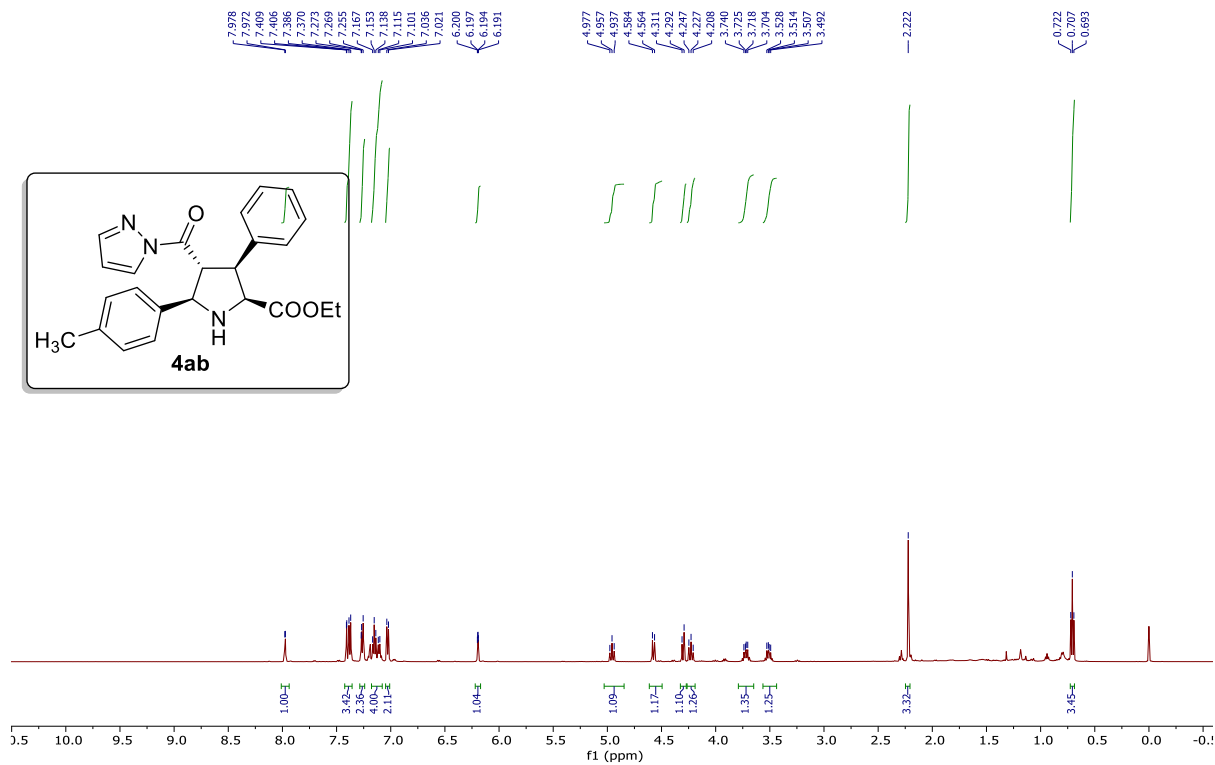

<sup>1</sup>H NMR (500 MHz, CDCl<sub>3</sub>) of compound **4ab**

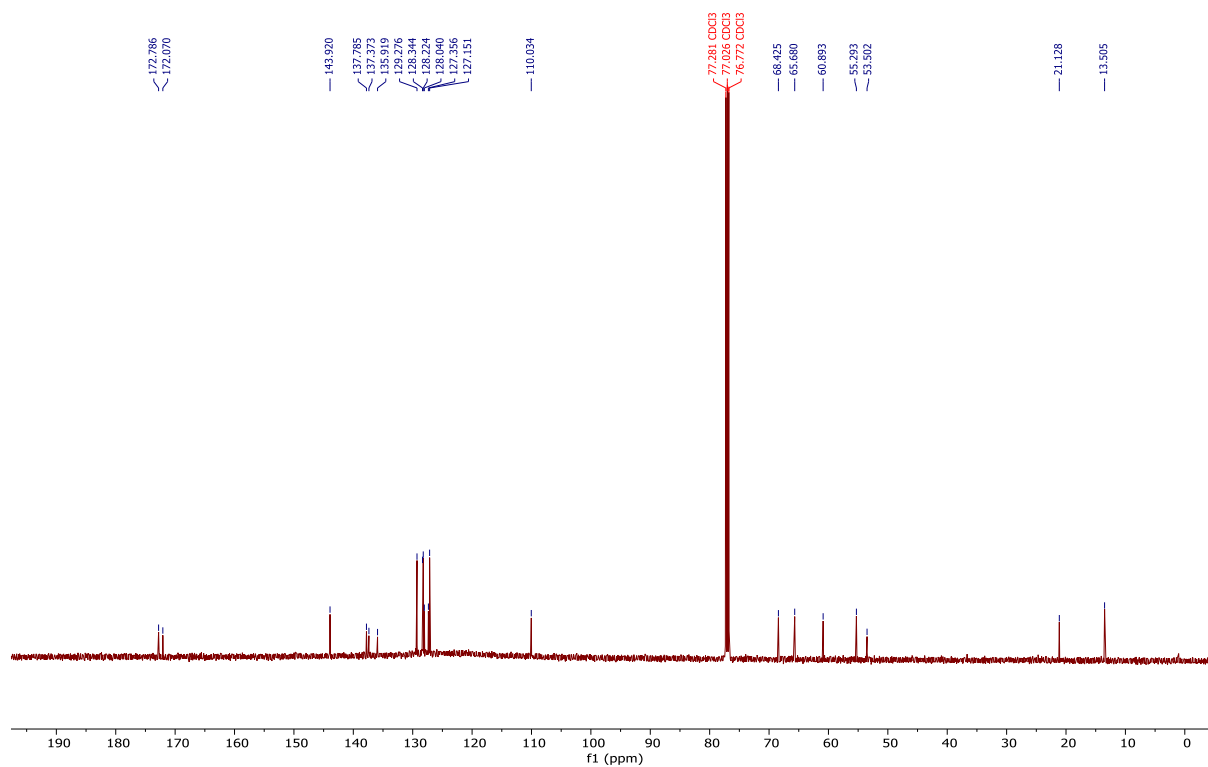

<sup>13</sup>C NMR (125 MHz, CDCl<sub>3</sub>) of compound **4ab**

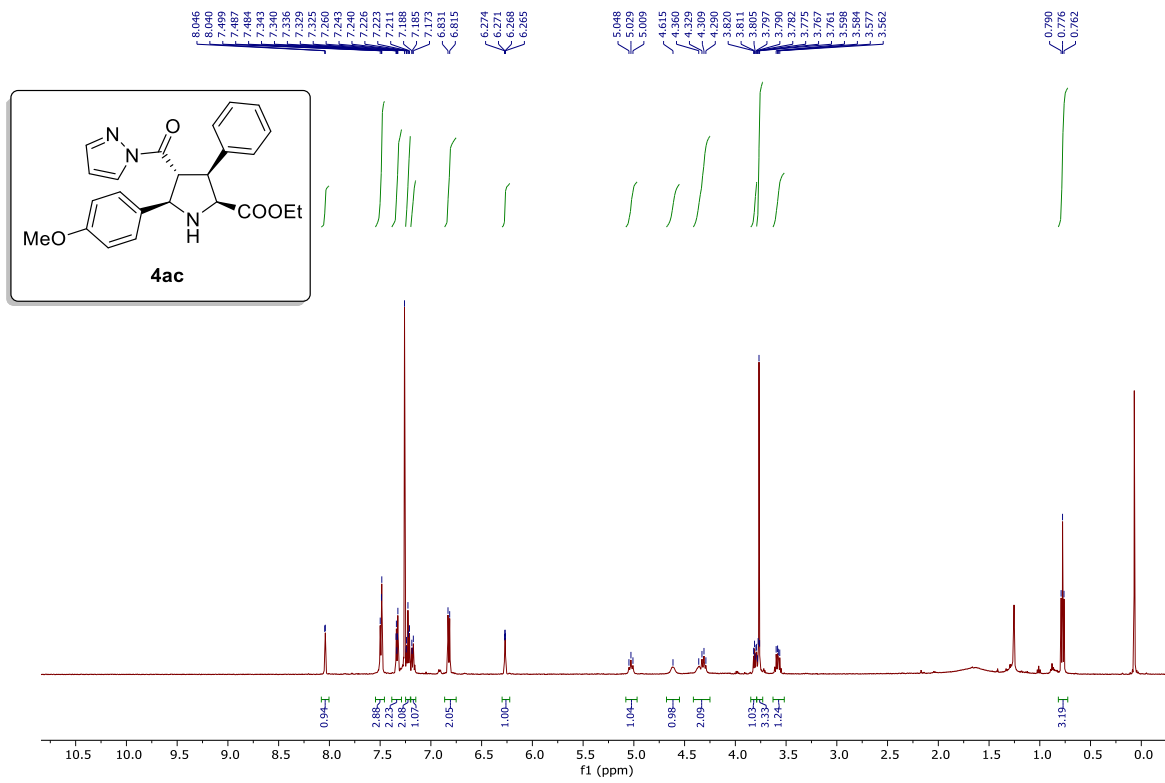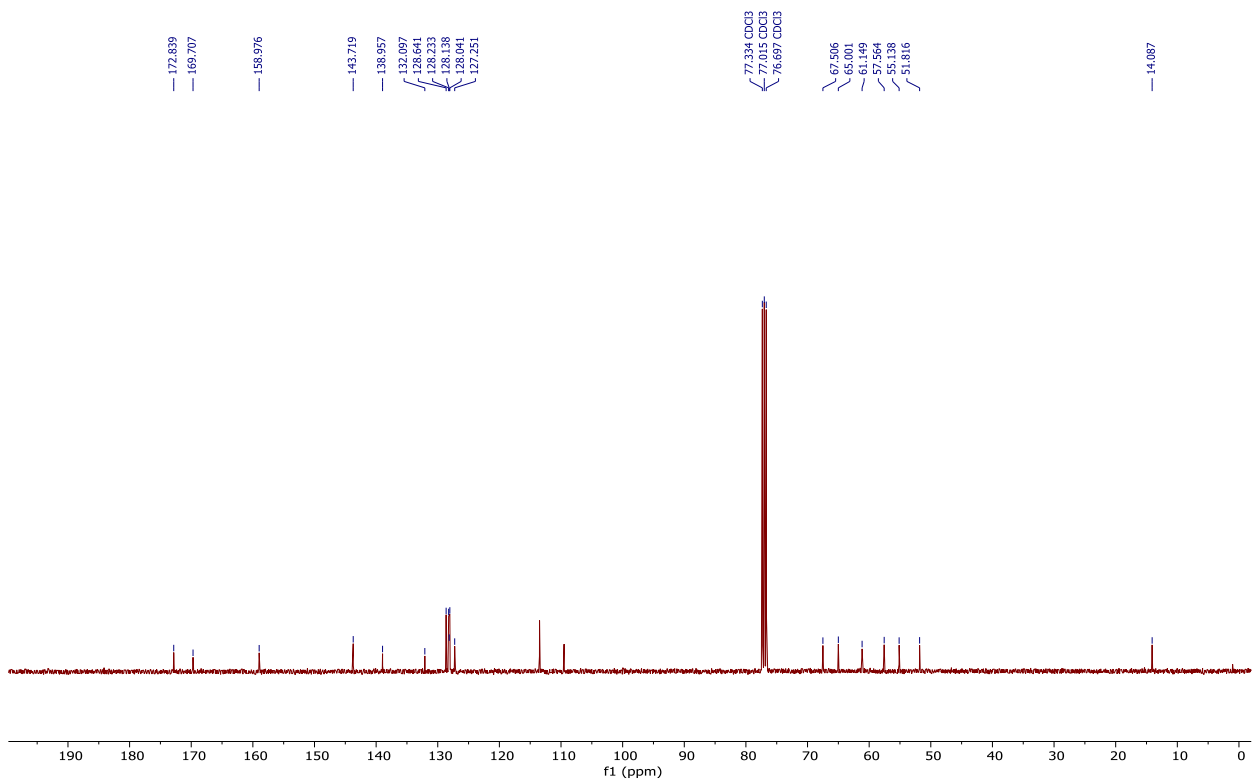

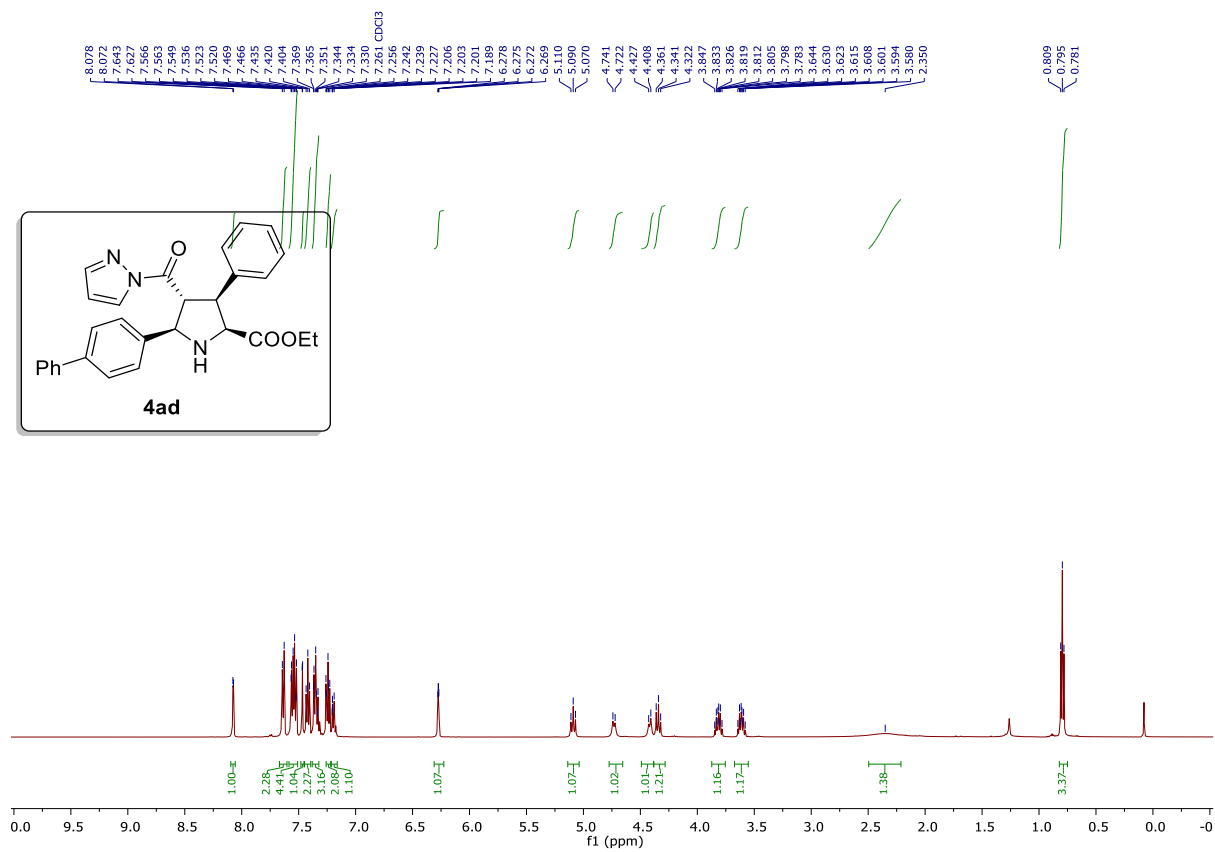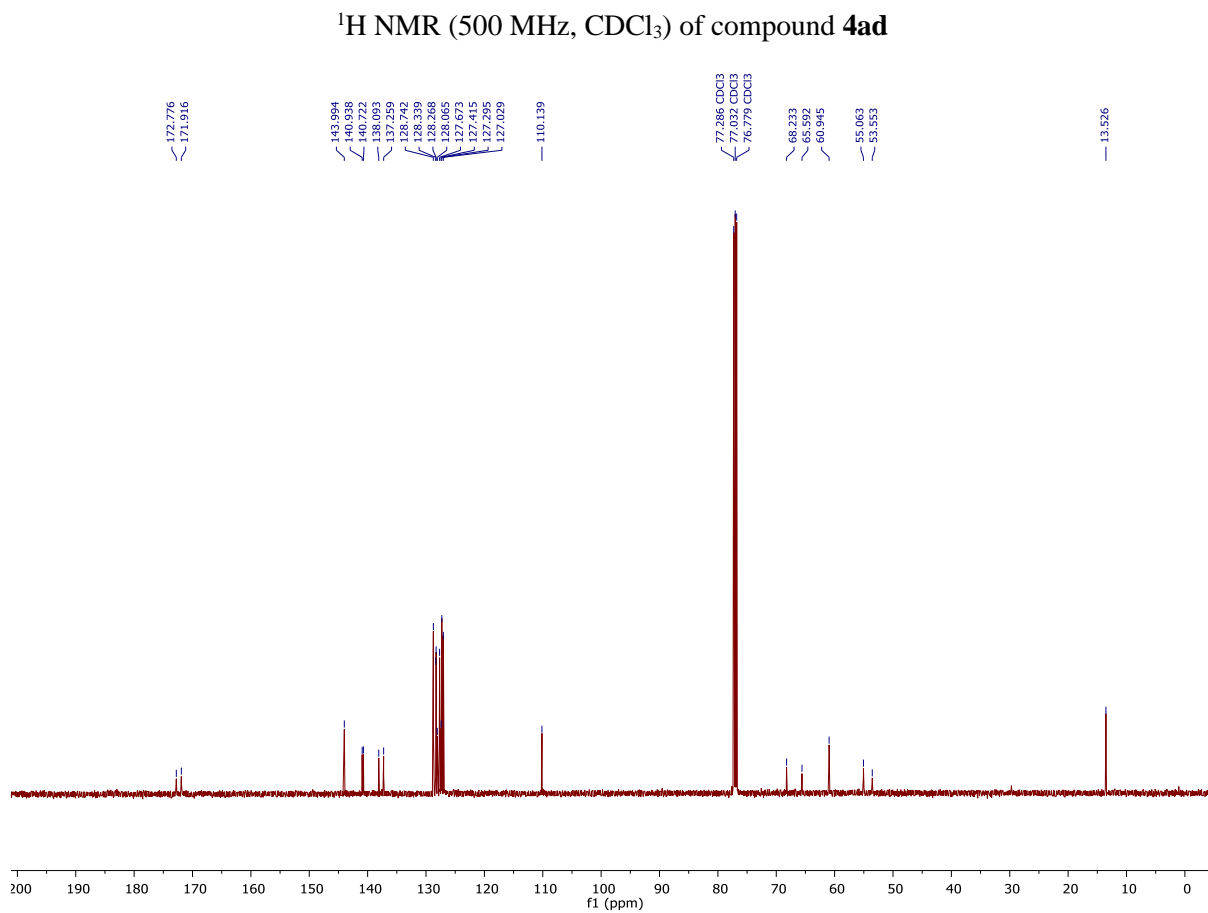

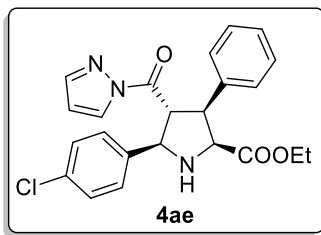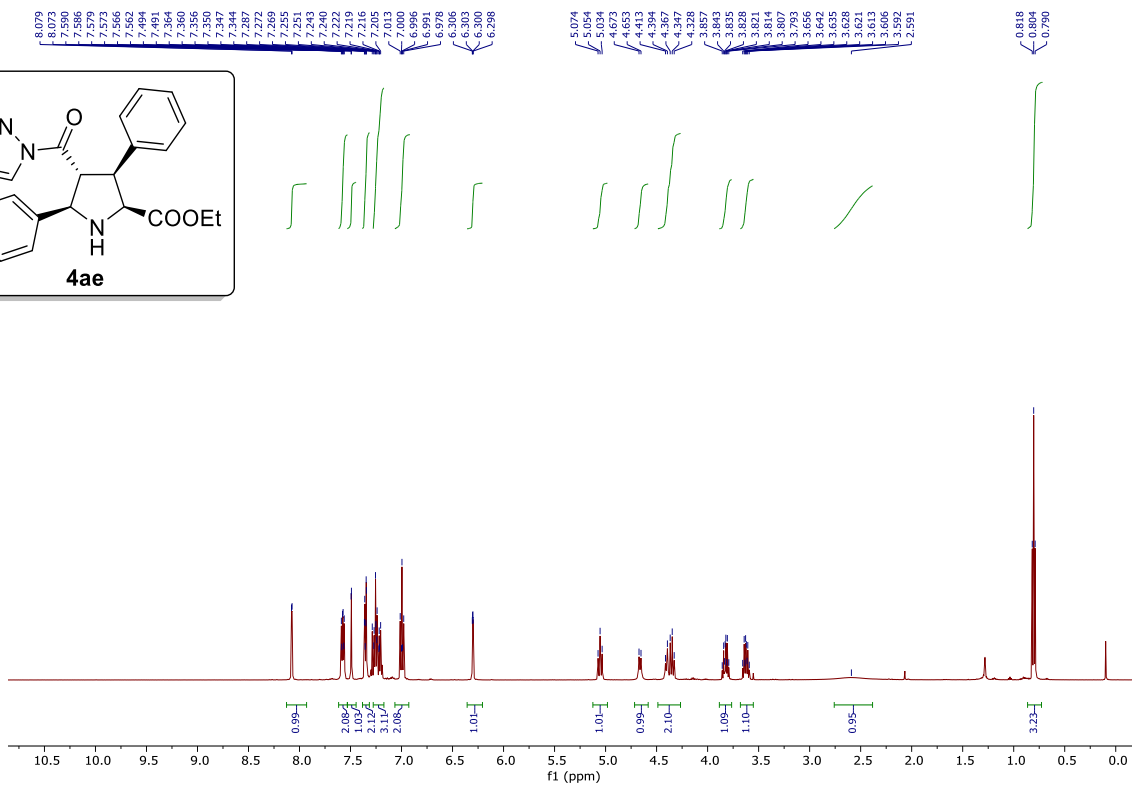

<sup>1</sup>H NMR (500 MHz, CDCl<sub>3</sub>) of compound **4ae**

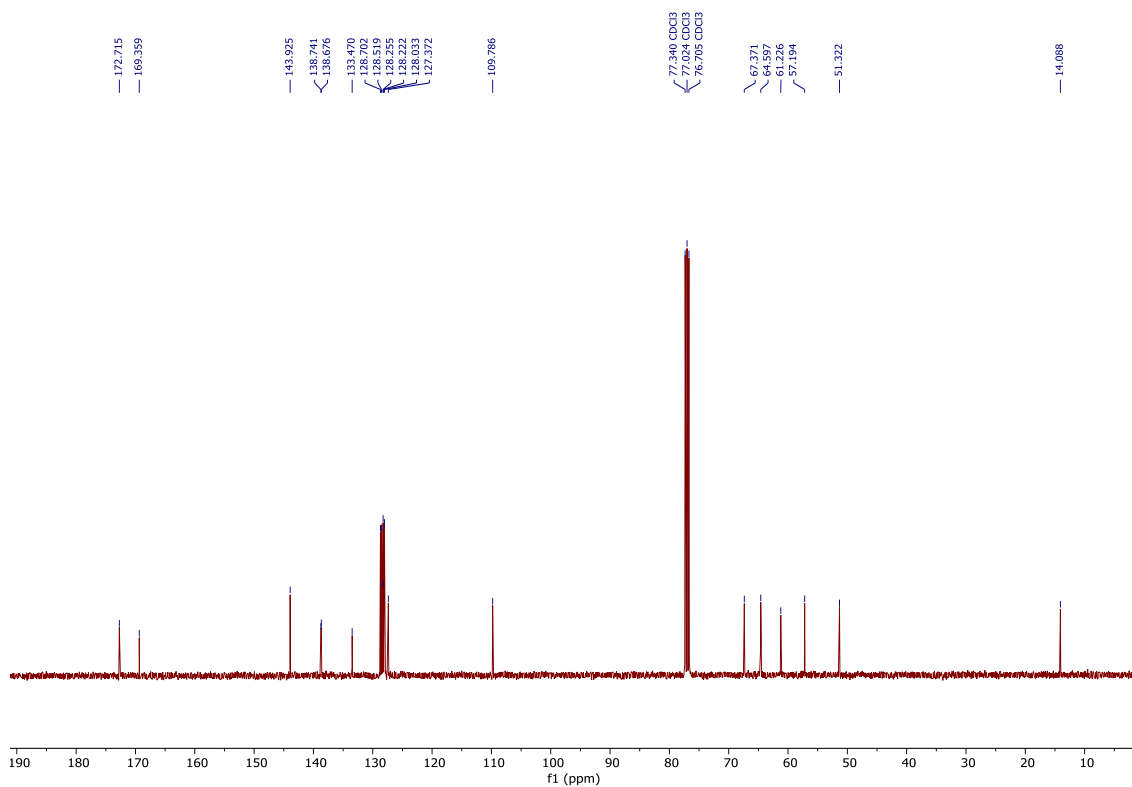

<sup>13</sup>C NMR (100 MHz, CDCl<sub>3</sub>) of compound **4ae**

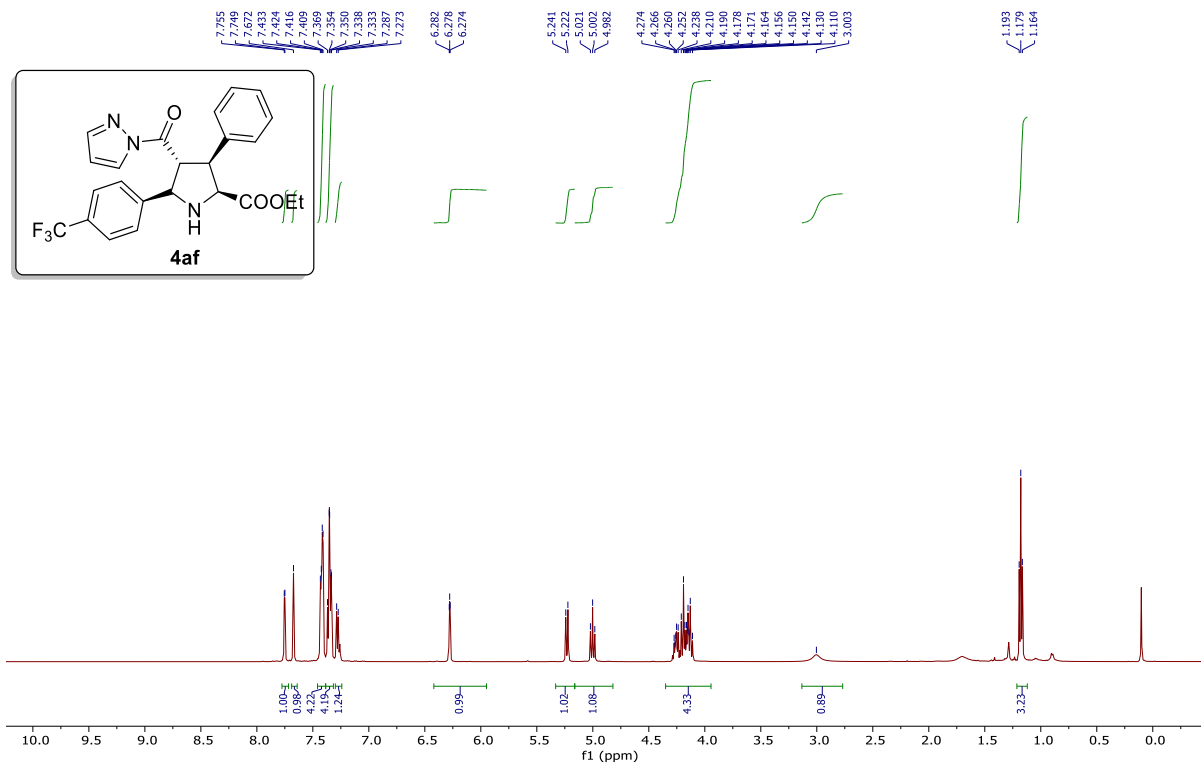

**<sup>1</sup>H NMR (500 MHz, CDCl<sub>3</sub>) of compound 4af**

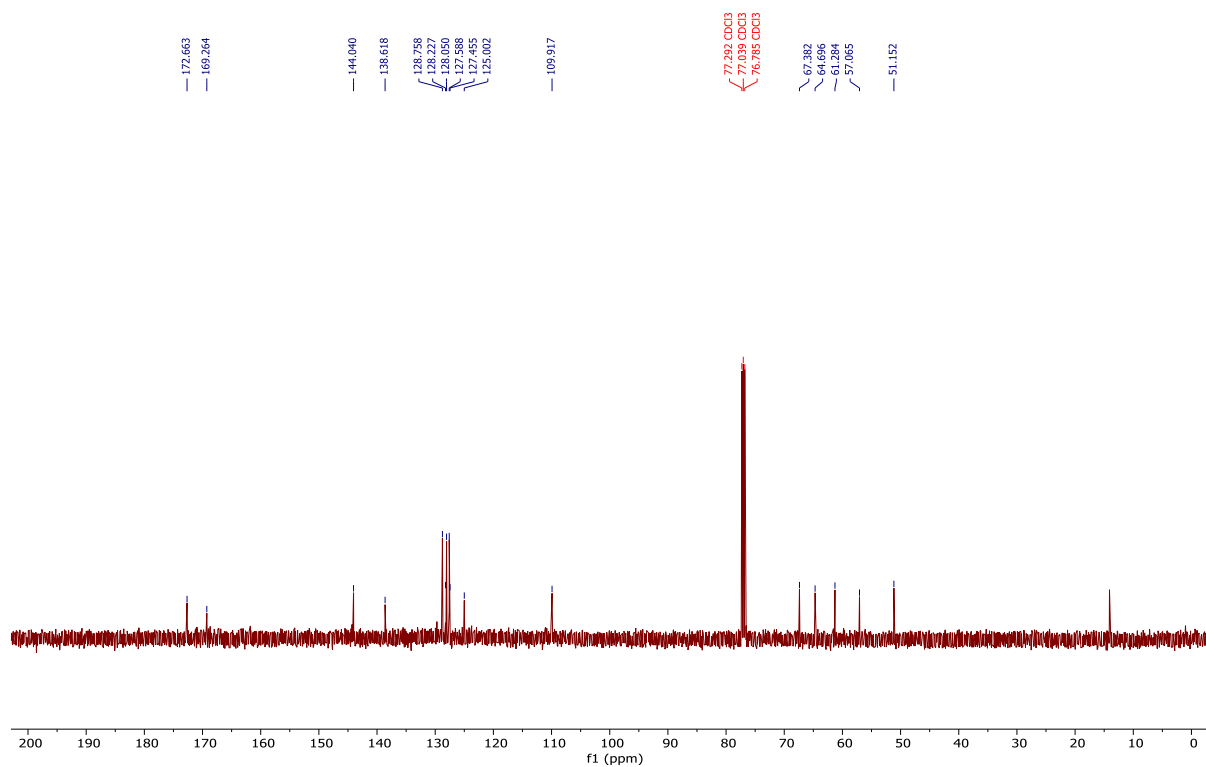

**<sup>13</sup>C NMR (125 MHz, CDCl<sub>3</sub>) of compound 4af**

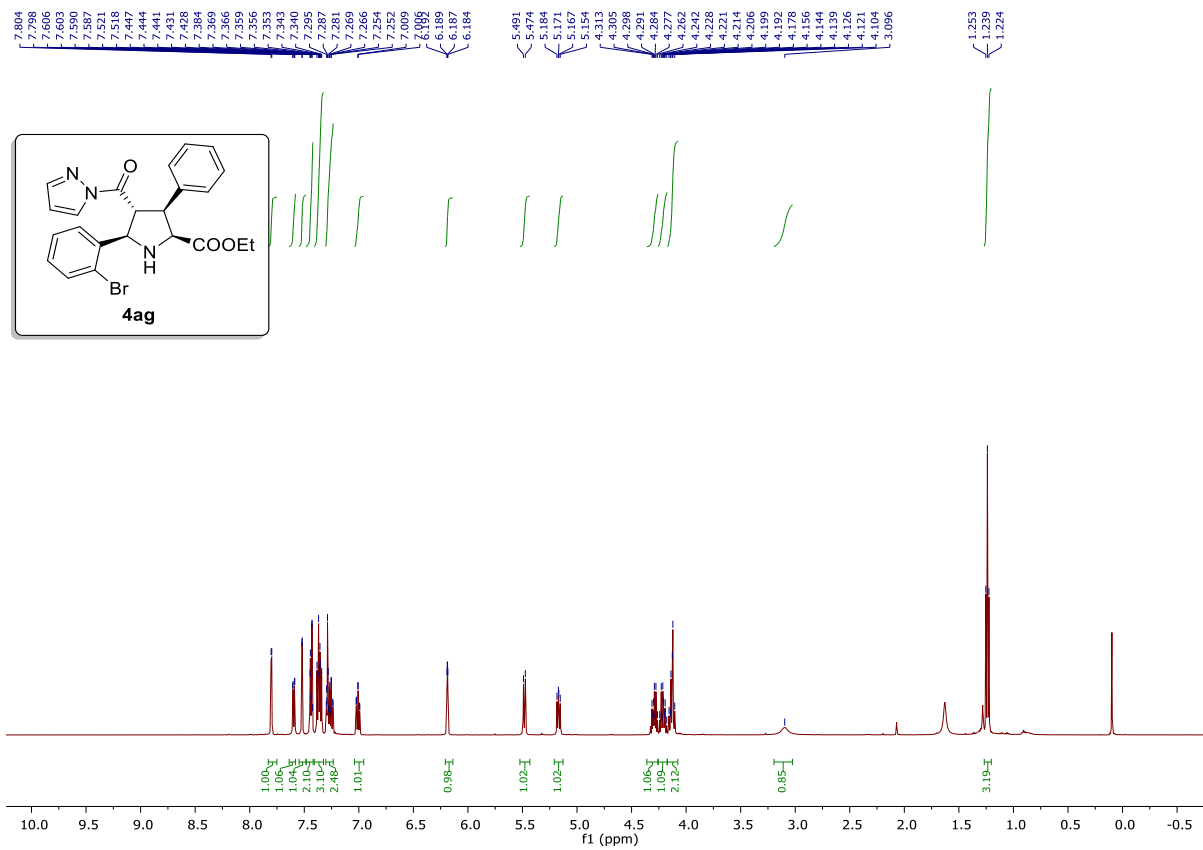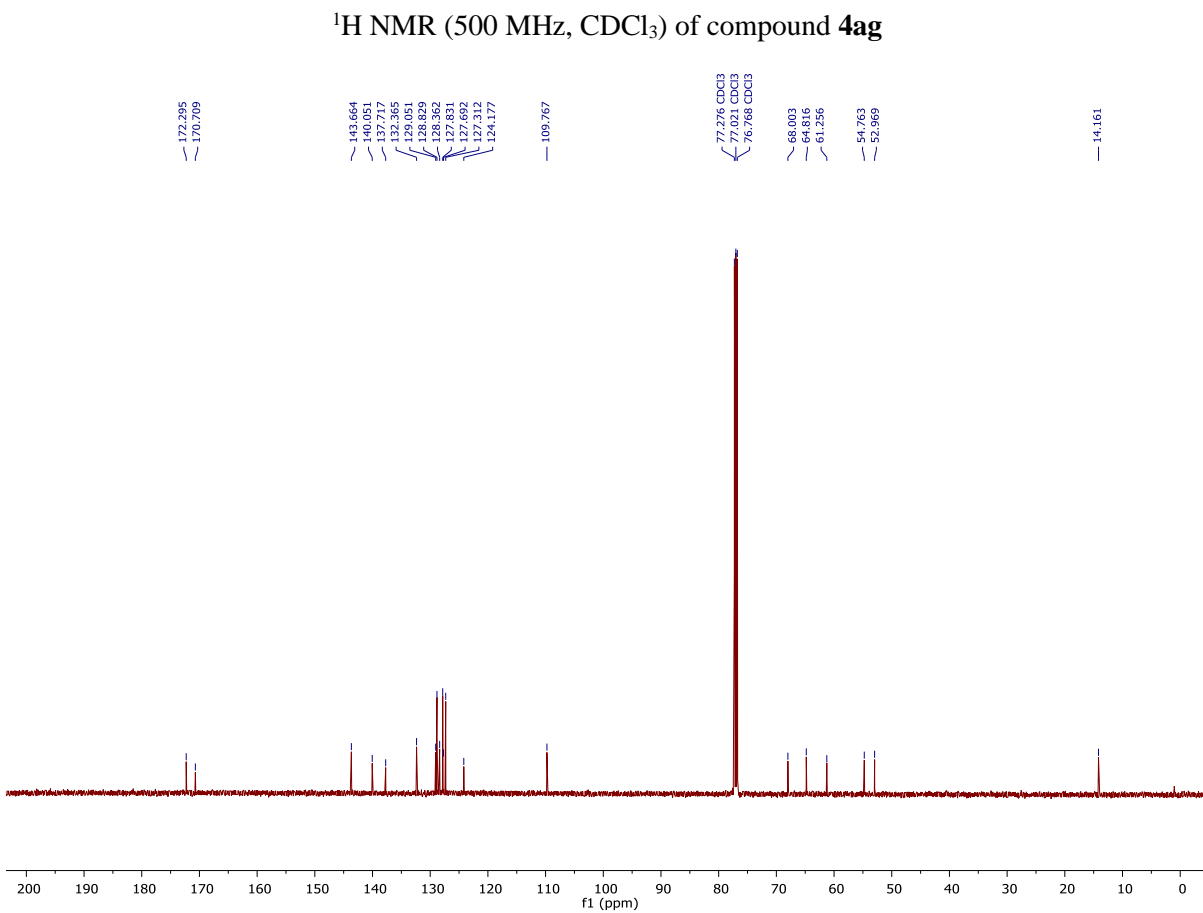

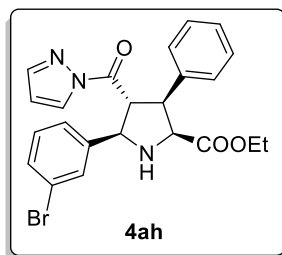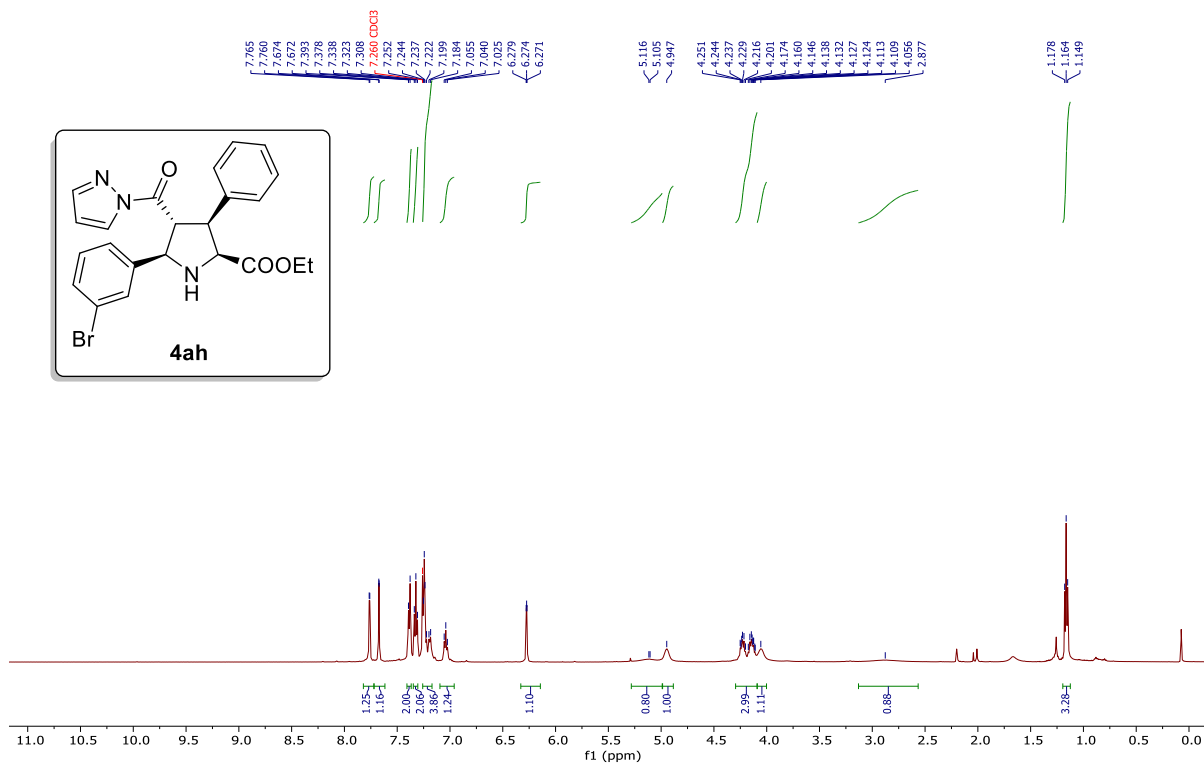

<sup>1</sup>H NMR (500 MHz, CDCl<sub>3</sub>) of compound **4ah**

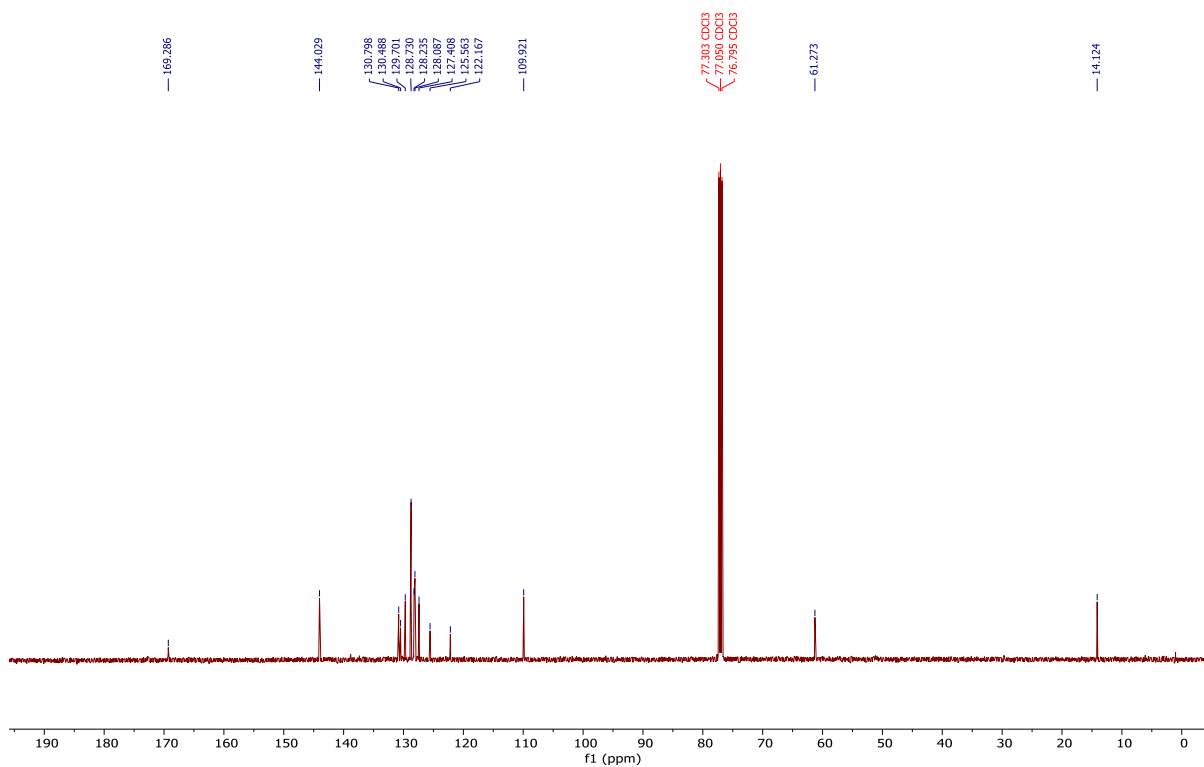

<sup>13</sup>C NMR (125 MHz, CDCl<sub>3</sub>) of compound **4ah**



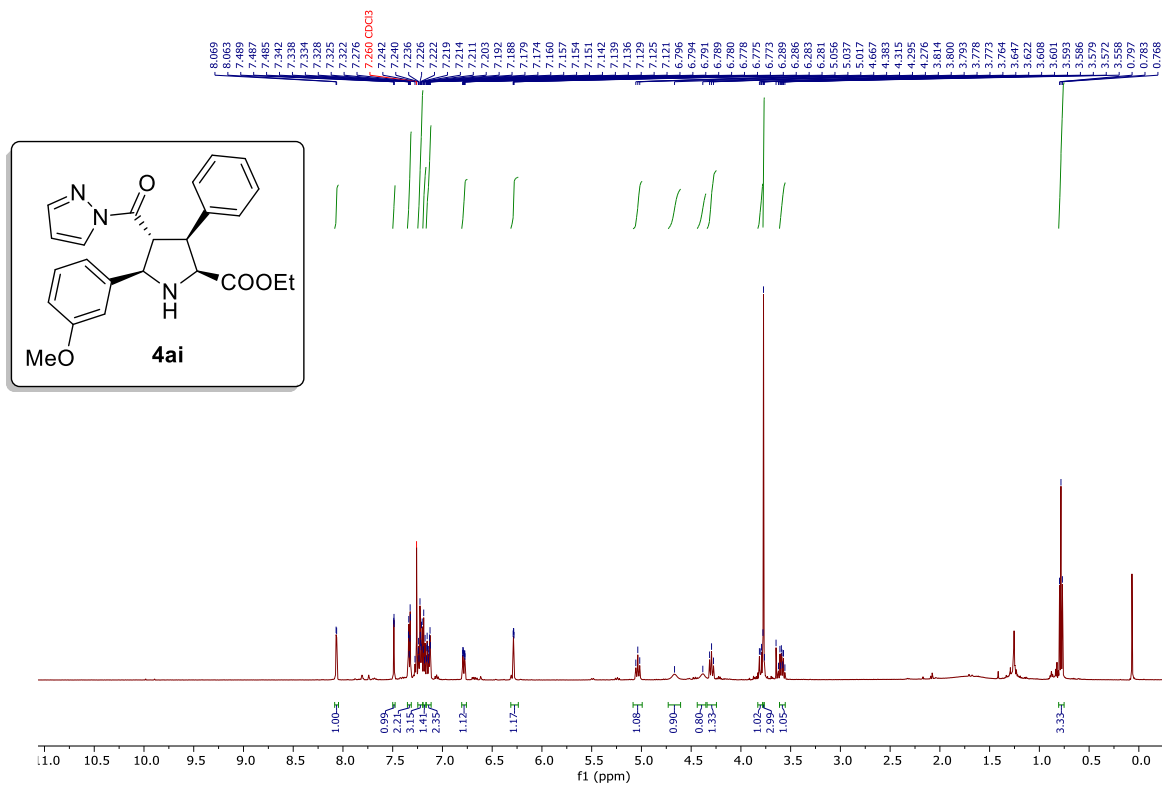

<sup>1</sup>H NMR (500 MHz, CDCl<sub>3</sub>) of compound **4ai**

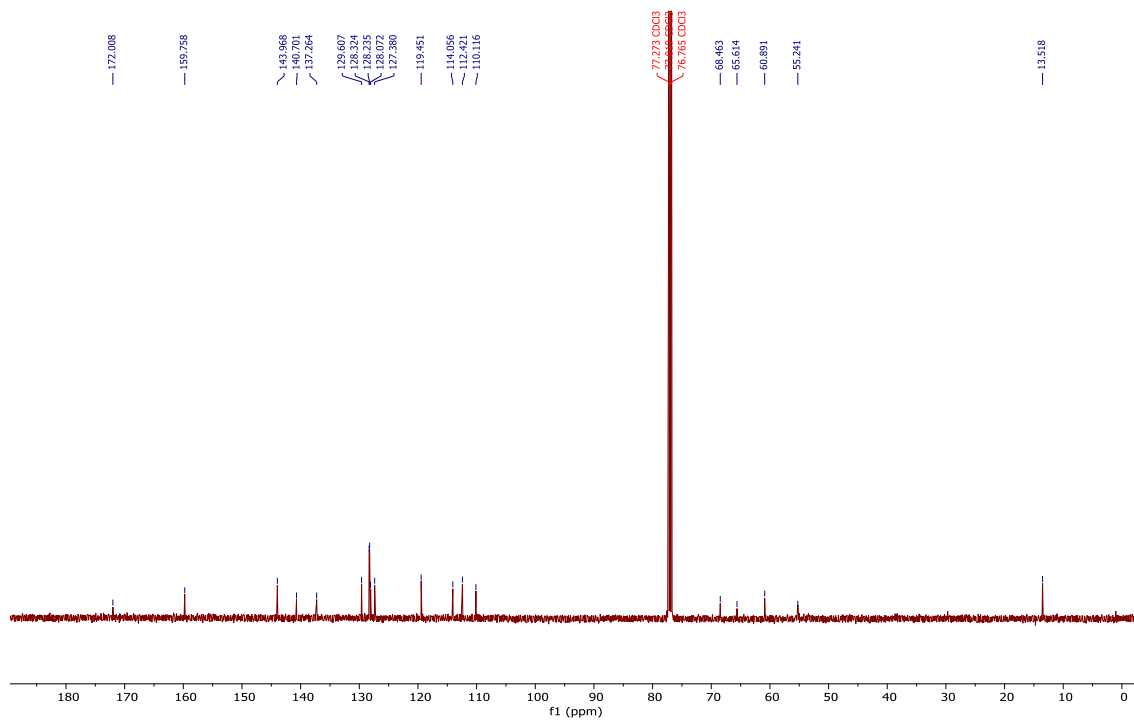

<sup>13</sup>C NMR (125 MHz, CDCl<sub>3</sub>) of compound **4ai**

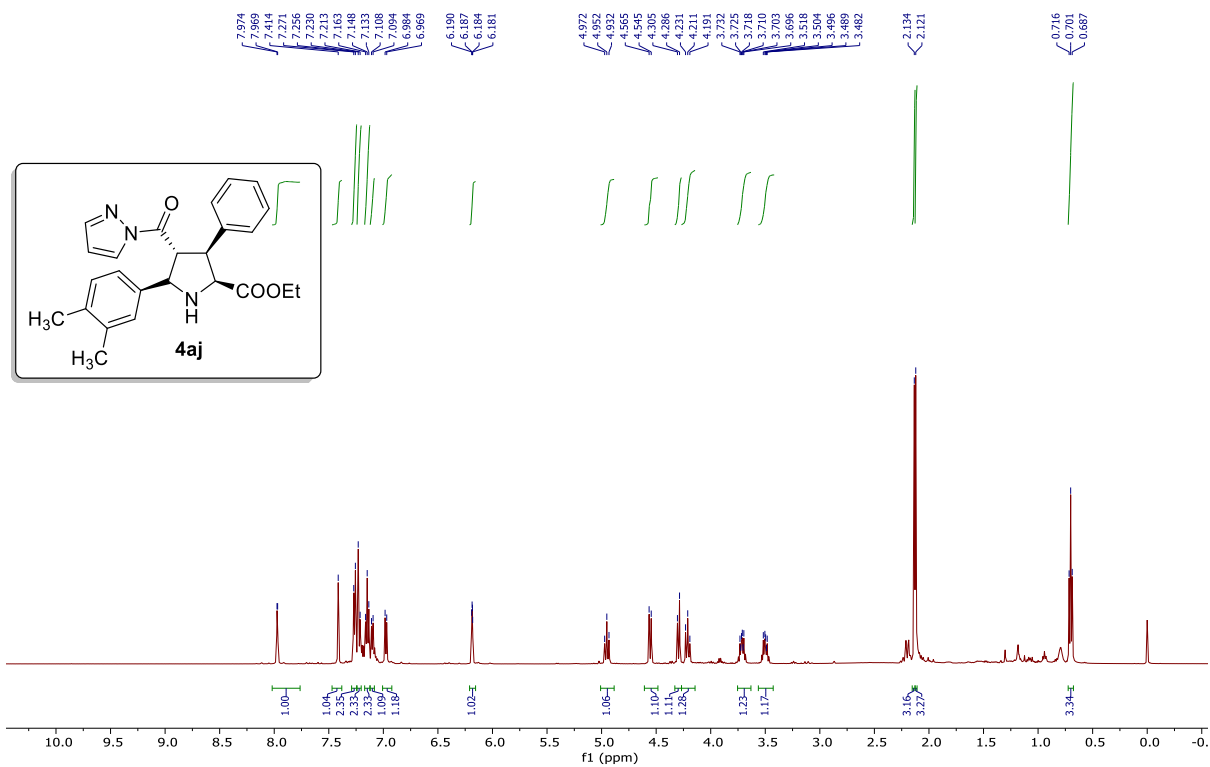

<sup>1</sup>H NMR (500 MHz, CDCl<sub>3</sub>) of compound **4aj**

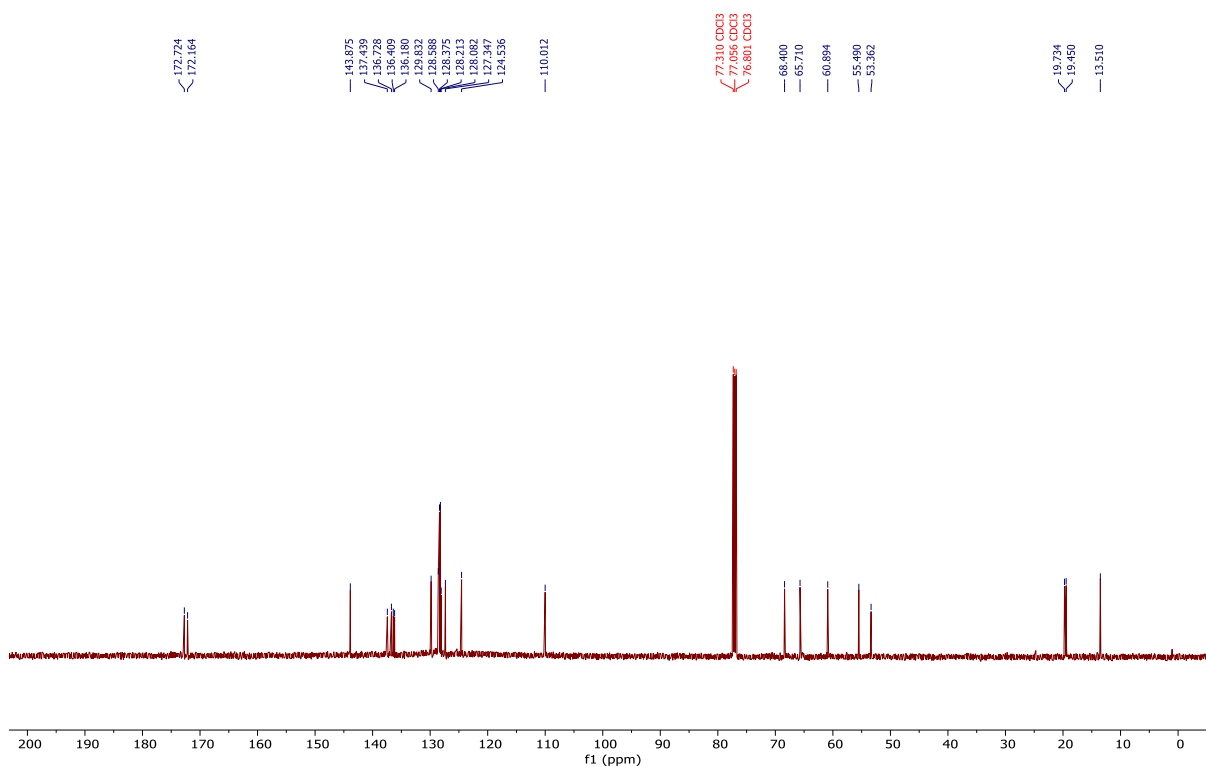

<sup>13</sup>C NMR (125 MHz, CDCl<sub>3</sub>) of compound **4aj**

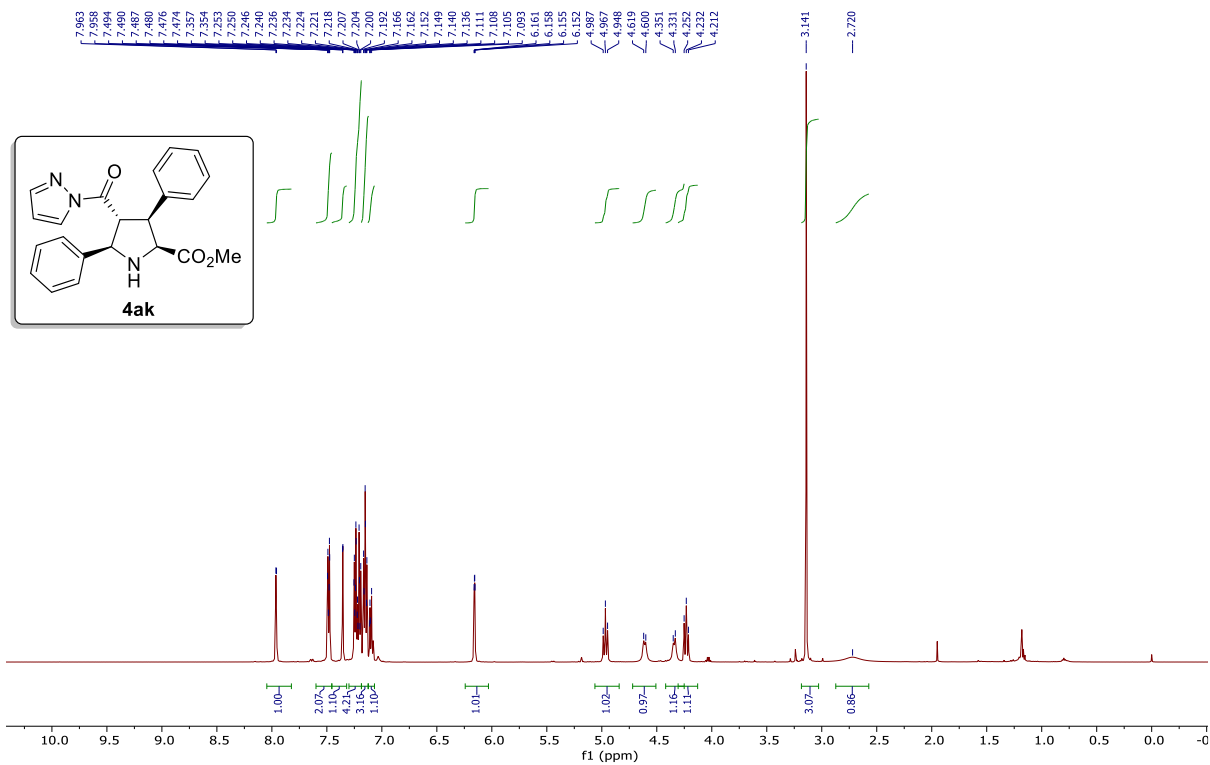

<sup>1</sup>H NMR (500 MHz, CDCl<sub>3</sub>) of compound **4ak**

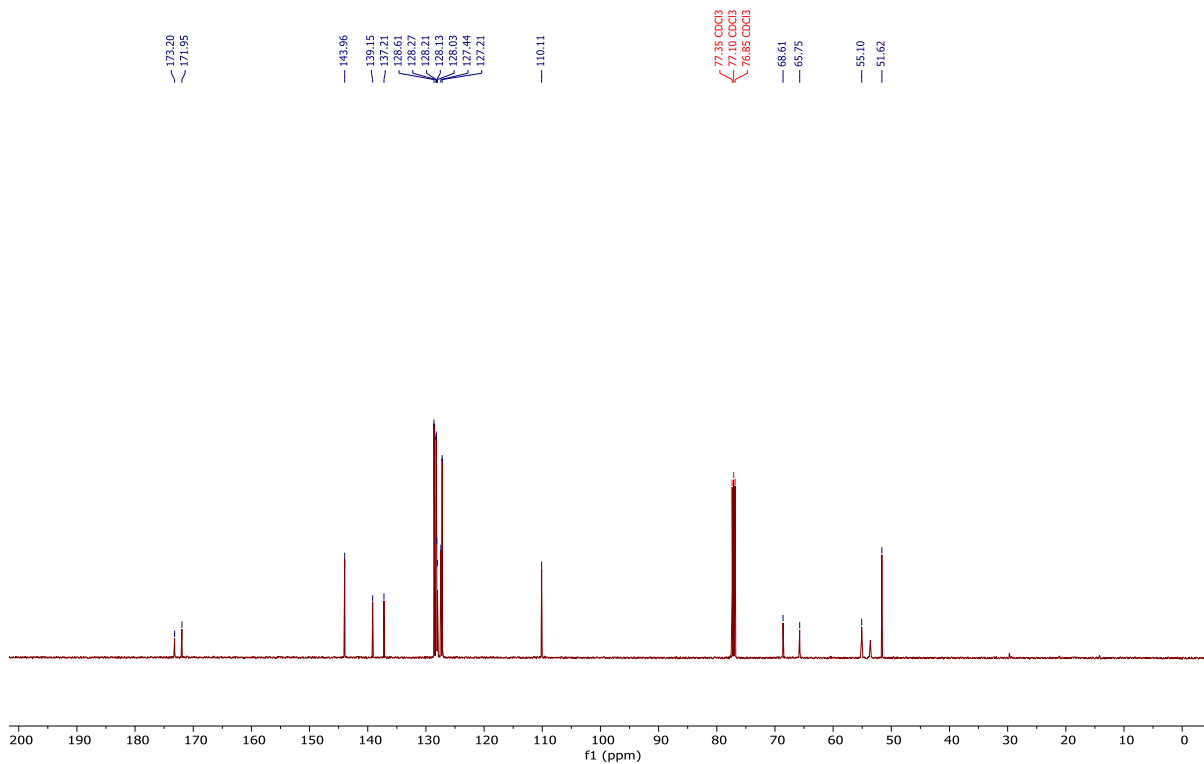

<sup>13</sup>C NMR (100 MHz, CDCl<sub>3</sub>) of compound **4ak**

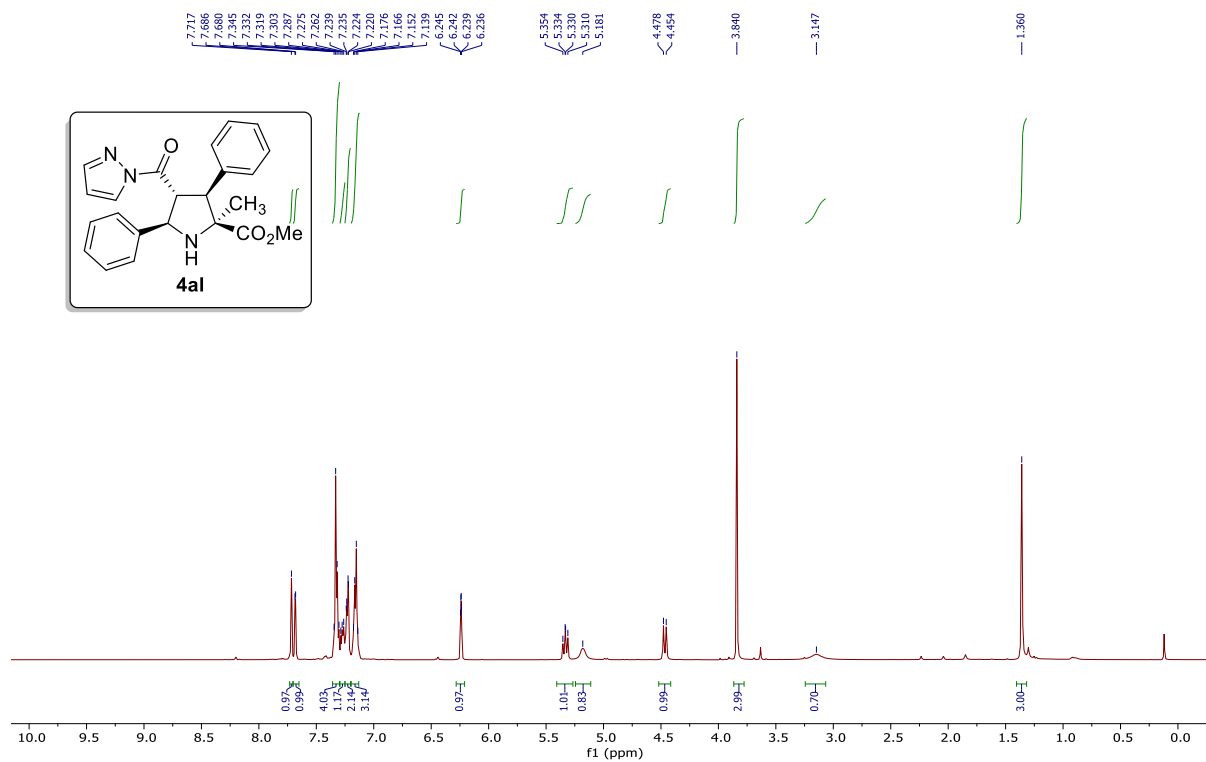

<sup>1</sup>H NMR (500 MHz, CDCl<sub>3</sub>) of compound **4al**

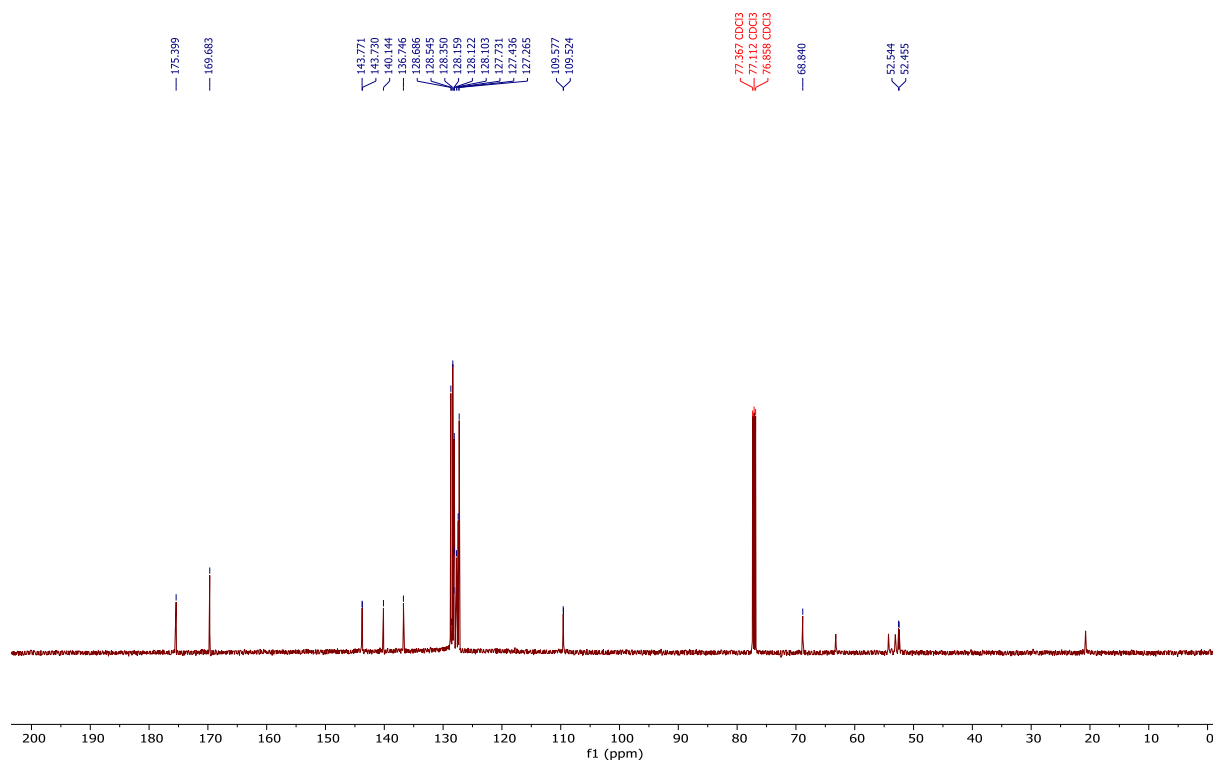

<sup>13</sup>C NMR (100 MHz, CDCl<sub>3</sub>) of compound **4al**

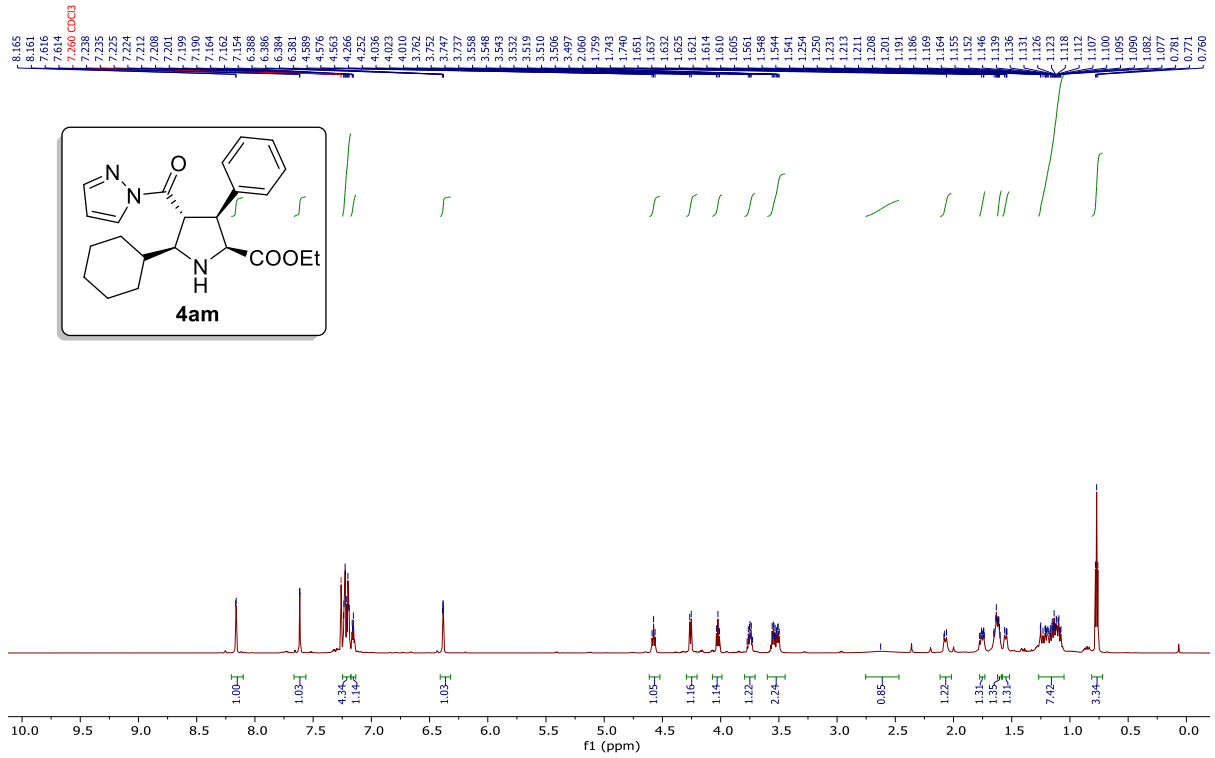

$^1\text{H}$  NMR (700 MHz,  $\text{CDCl}_3$ ) of compound **4am**

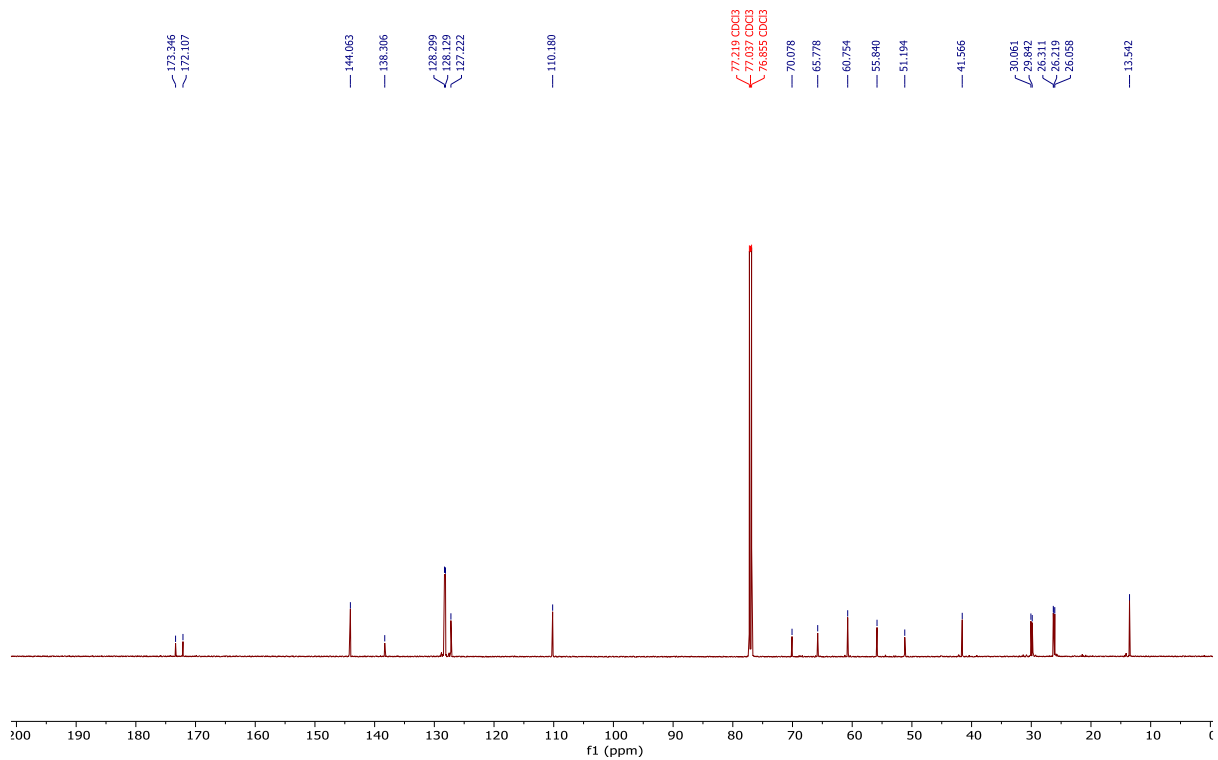

$^{13}\text{C}$  NMR (175 MHz,  $\text{CDCl}_3$ ) of compound **4am**

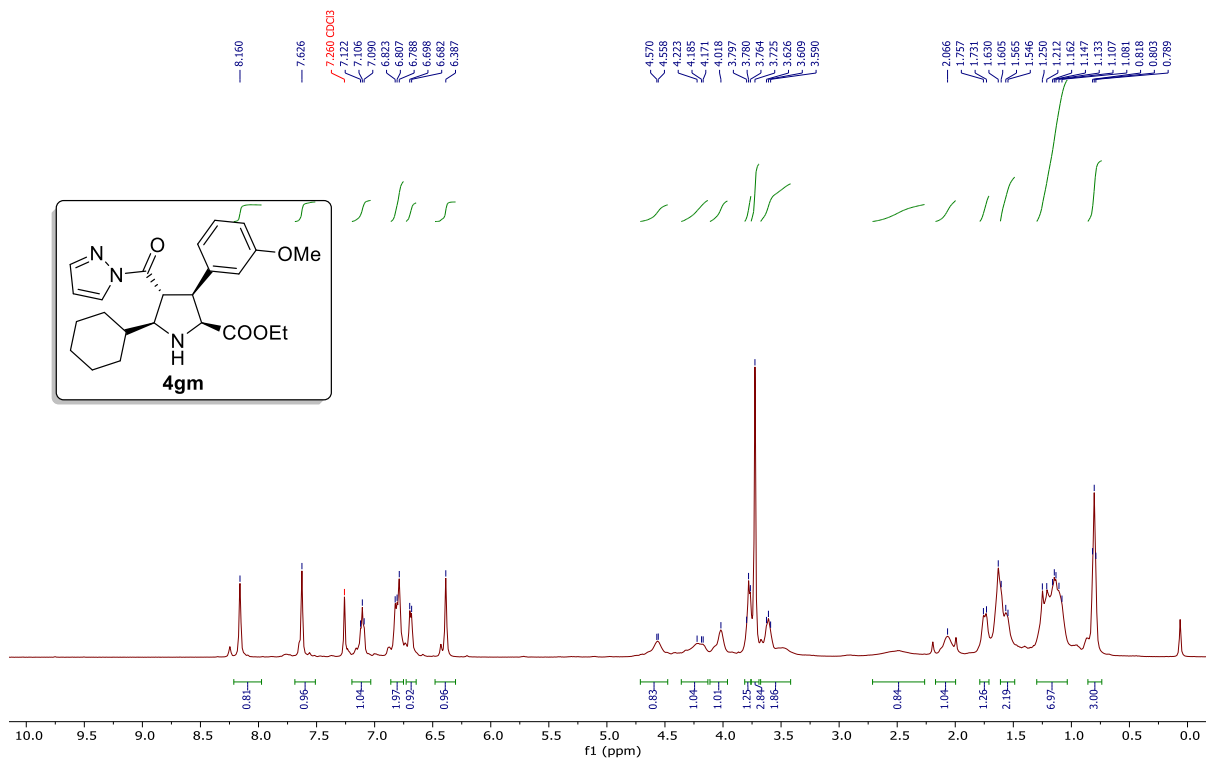

<sup>1</sup>H NMR (500 MHz, CDCl<sub>3</sub>) of compound **4gm**

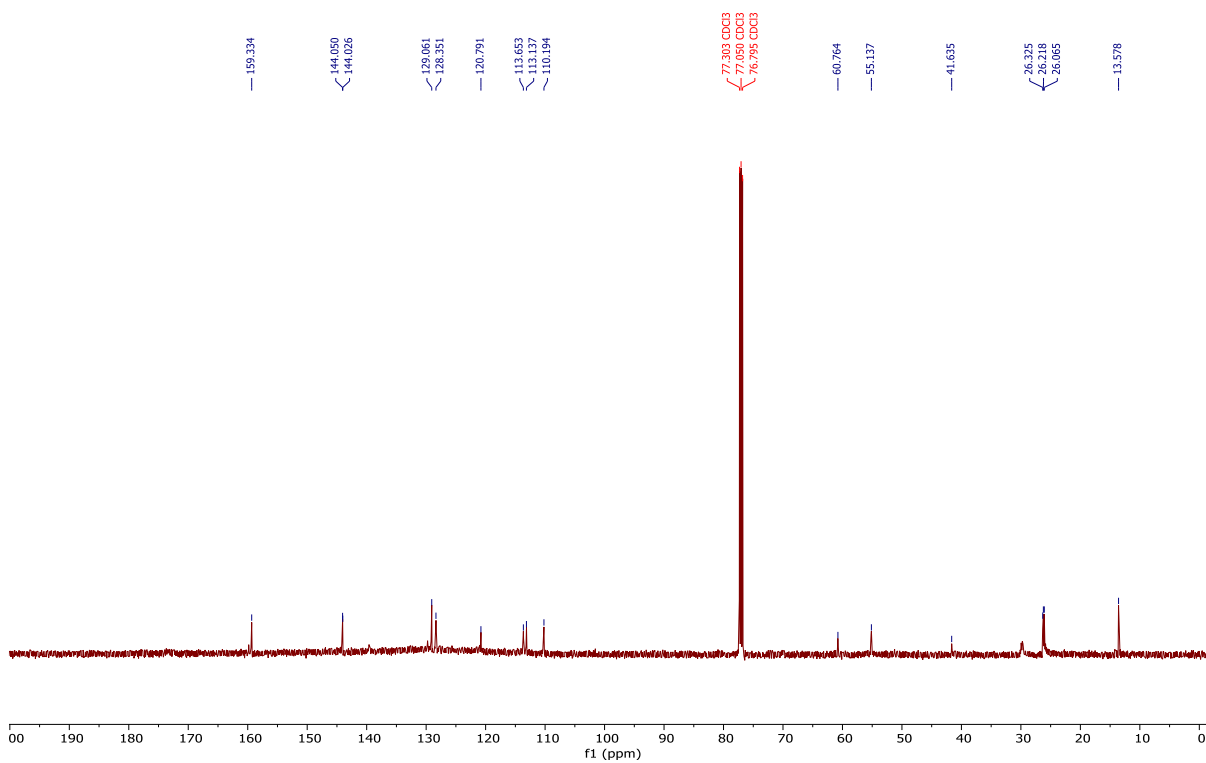

<sup>13</sup>C NMR (125 MHz, CDCl<sub>3</sub>) of compound **4gm**

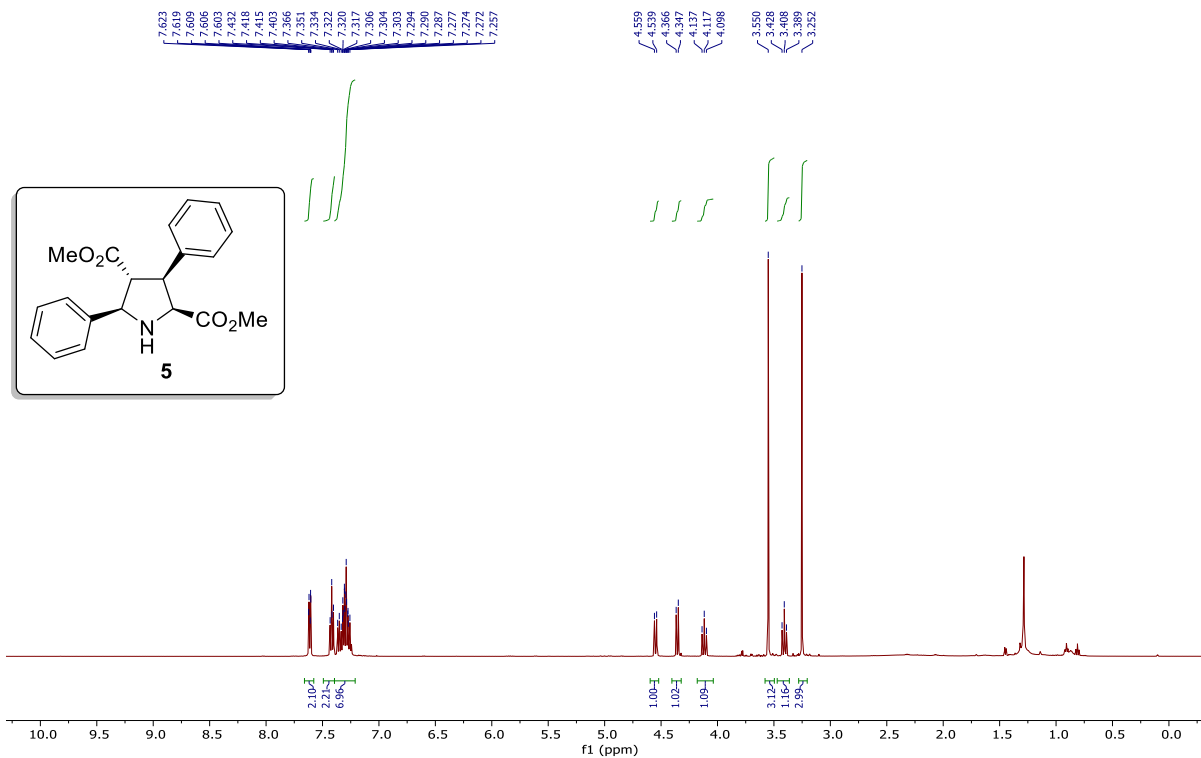

<sup>1</sup>H NMR (500 MHz, CDCl<sub>3</sub>) of compound **5**

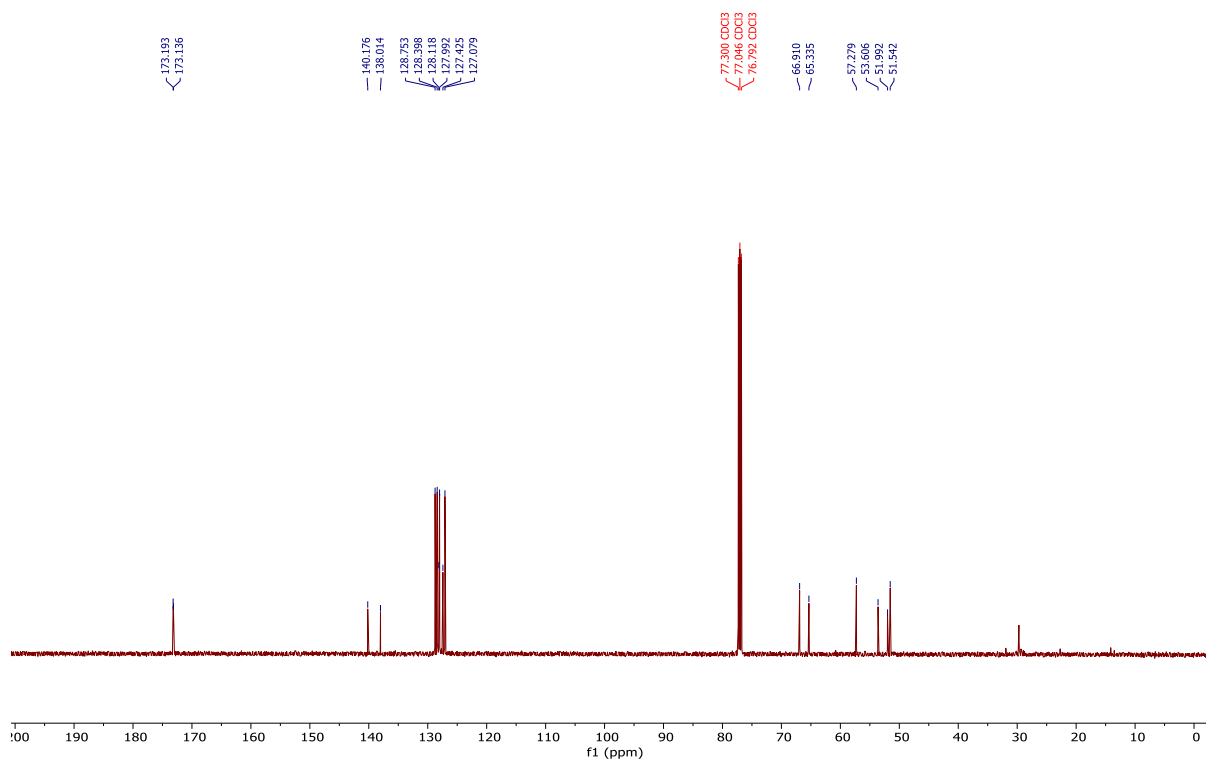

<sup>13</sup>C NMR (125 MHz, CDCl<sub>3</sub>) of compound **5**

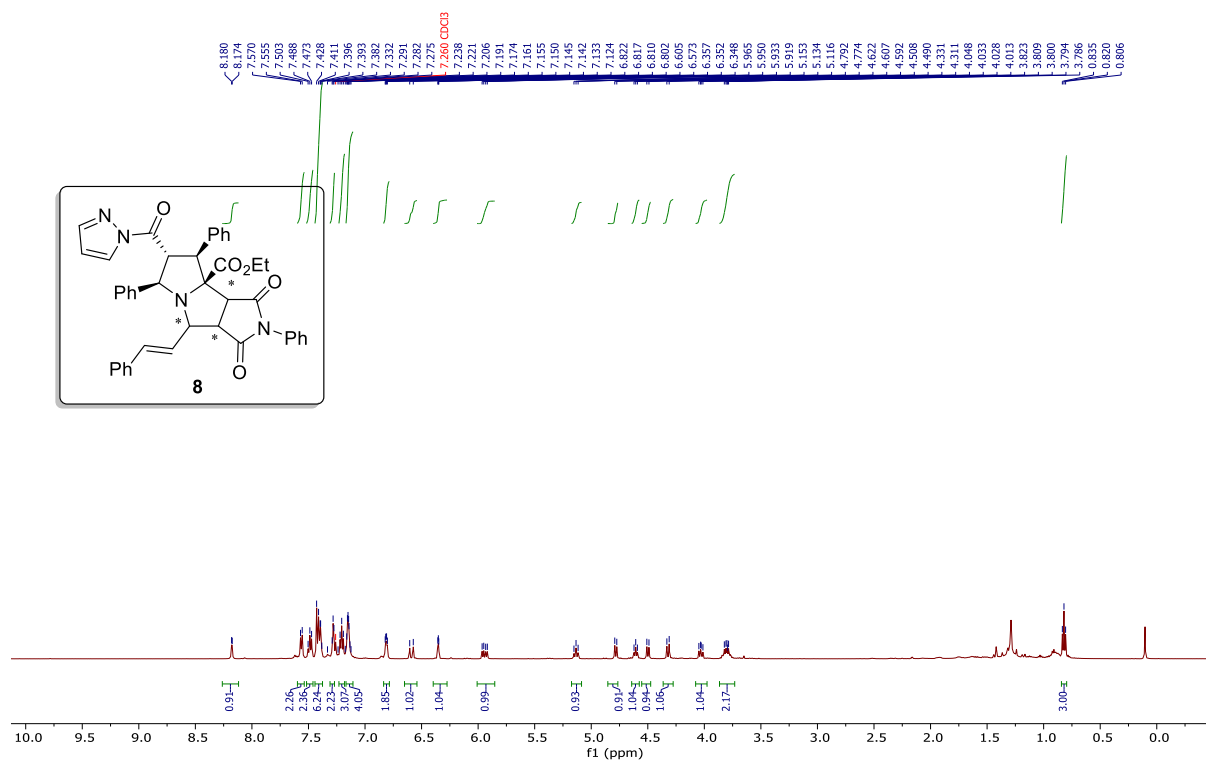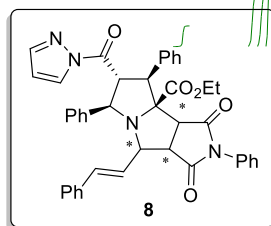

<sup>1</sup>H NMR (500 MHz, CDCl<sub>3</sub>) of compound **8**

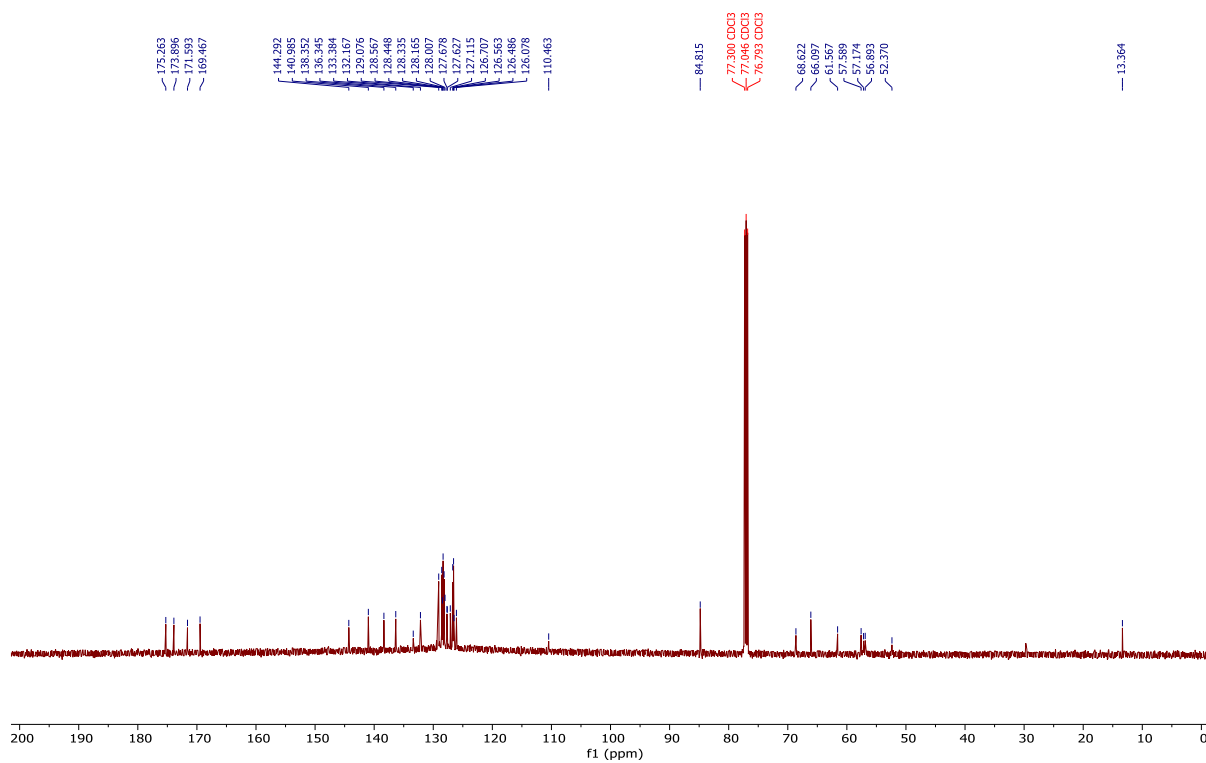

<sup>13</sup>C NMR (125 MHz, CDCl<sub>3</sub>) of compound **8**



## HPLC Traces

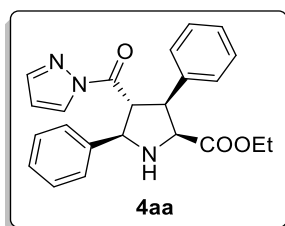

Sample Name: RGB-654-Rac-ID-30-254

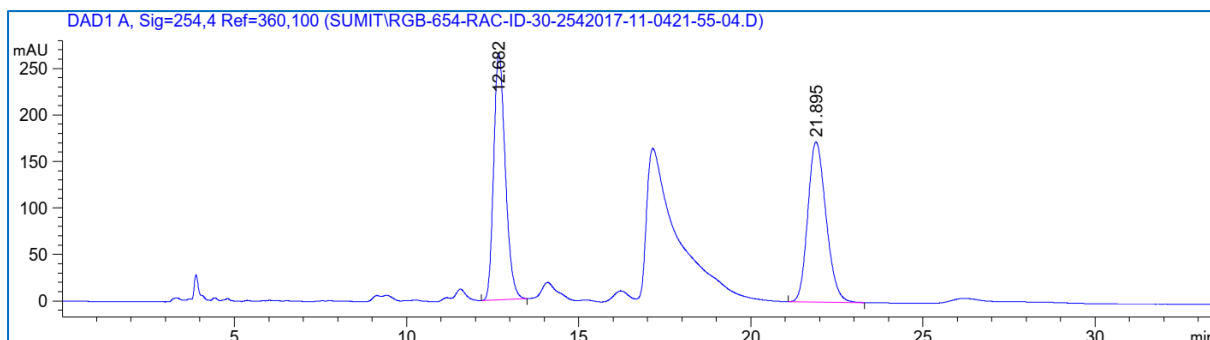

| Peak # | RetTime [min] | Type | Width [min] | Area [mAU*s] | Height [mAU] | Area %  |
|--------|---------------|------|-------------|--------------|--------------|---------|
| 1      | 12.682        | BB   | 0.3613      | 6216.34717   | 265.38614    | 49.5260 |
| 2      | 21.895        | BB   | 0.5713      | 6335.32617   | 172.18481    | 50.4740 |

Totals : 1.25517e4 437.57095

HPLC chromatogram of racemic **4aa**

Sample Name: RGB-682-Chiral-ID-30-1-254-1

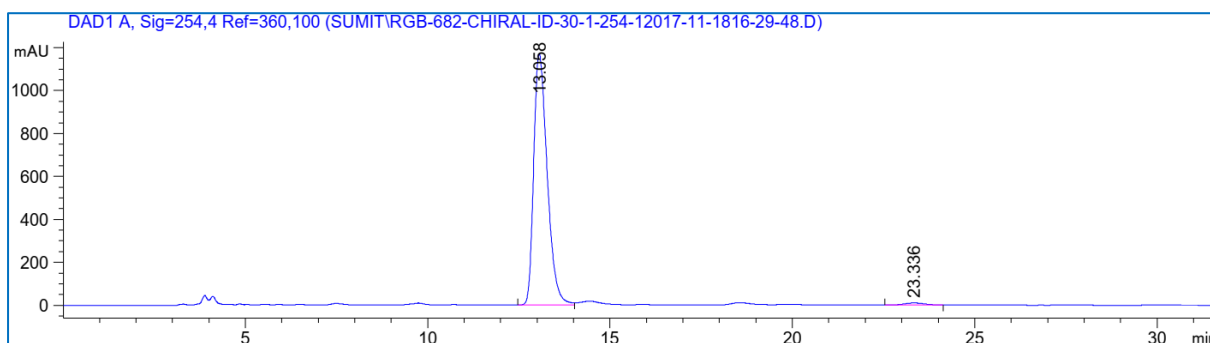

| Peak # | RetTime [min] | Type | Width [min] | Area [mAU*s] | Height [mAU] | Area %  |
|--------|---------------|------|-------------|--------------|--------------|---------|
| 1      | 13.058        | BV   | 0.3981      | 3.00512e4    | 1168.19214   | 98.7675 |
| 2      | 23.336        | BB   | 0.5660      | 375.00452    | 9.80996      | 1.2325  |

Totals : 3.04262e4 1178.00209

HPLC chromatogram of enantioenriched **4aa**

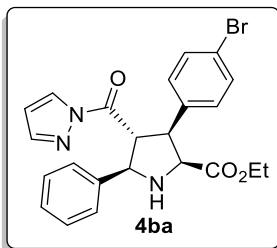

Sample Name: RGB-712-Rac-01-ID-30-1-254-1

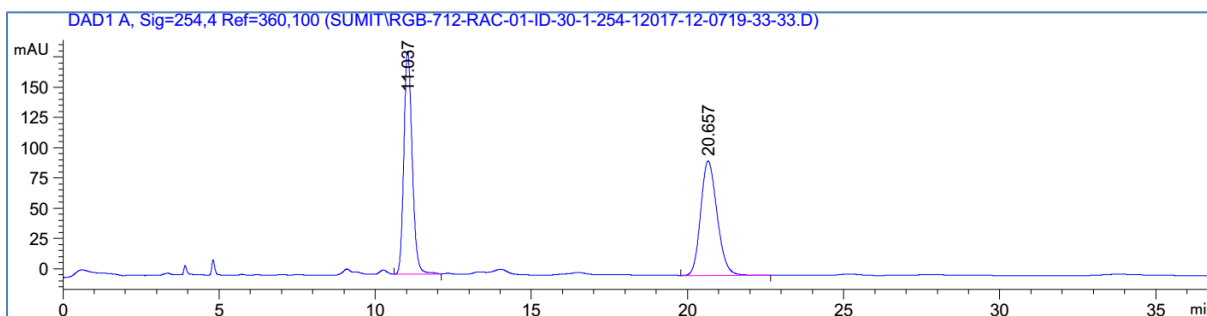

| Peak # | RetTime [min] | Type | Width [min] | Area [mAU*s] | Height [mAU] | Area %  |
|--------|---------------|------|-------------|--------------|--------------|---------|
| 1      | 11.037        | BB   | 0.2867      | 3424.95728   | 184.37140    | 49.7447 |
| 2      | 20.657        | BB   | 0.5672      | 3460.10669   | 94.50213     | 50.2553 |

Totals : 6885.06396 278.87353

HPLC chromatogram of racemic **4ba**

Sample Name: RGB-713-Chiral-01-ID-30-1-254-1

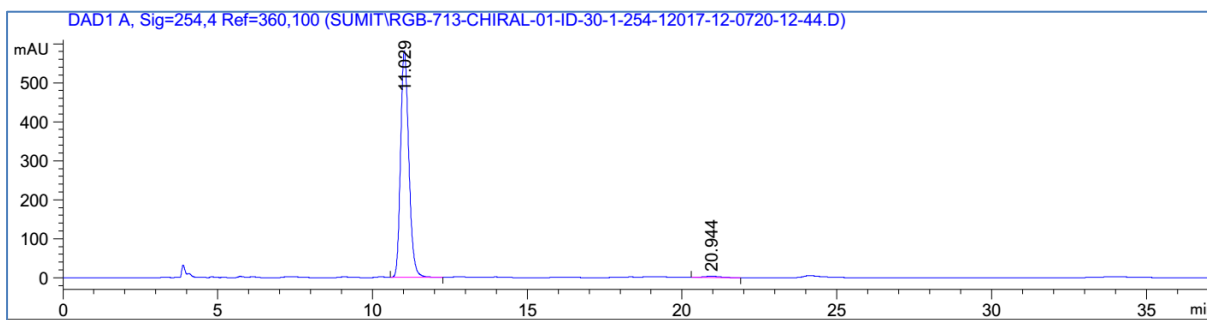

| Peak # | RetTime [min] | Type | Width [min] | Area [mAU*s] | Height [mAU] | Area %  |
|--------|---------------|------|-------------|--------------|--------------|---------|
| 1      | 11.029        | VB   | 0.2861      | 1.07659e4    | 581.19348    | 98.9331 |
| 2      | 20.944        | BB   | 0.5448      | 116.10085    | 3.31311      | 1.0669  |

Totals : 1.08820e4 584.50659

HPLC chromatogram of enantioenriched **4ba**

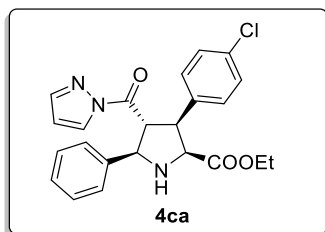

Sample Name: RGB-714-Rac-01-ID-30-1-254-1

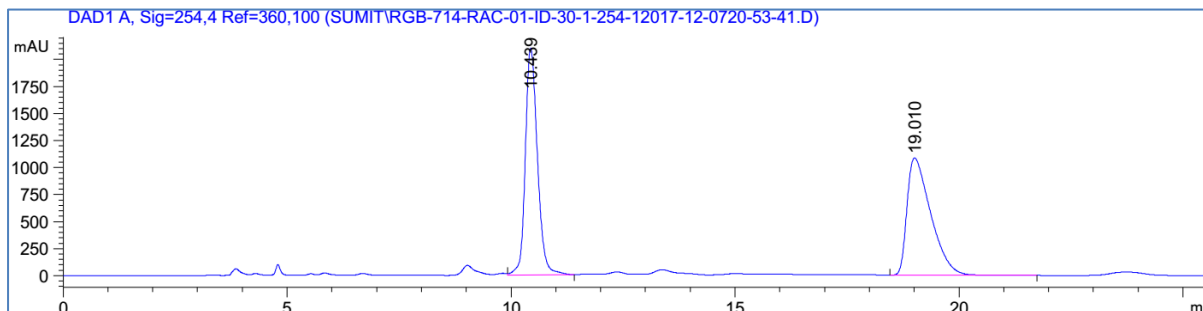

| Peak # | RetTime [min] | Type | Width [min] | Area [mAU*s] | Height [mAU] | Area %  |
|--------|---------------|------|-------------|--------------|--------------|---------|
| 1      | 10.439        | VB   | 0.2889      | 3.93762e4    | 2098.60352   | 49.6437 |
| 2      | 19.010        | BB   | 0.5571      | 3.99414e4    | 1086.06604   | 50.3563 |

Totals : 7.93176e4 3184.66956

HPLC chromatogram of racemic **4ca**

Sample Name: RGB-715-Chiral-01-ID-30-1-254-1

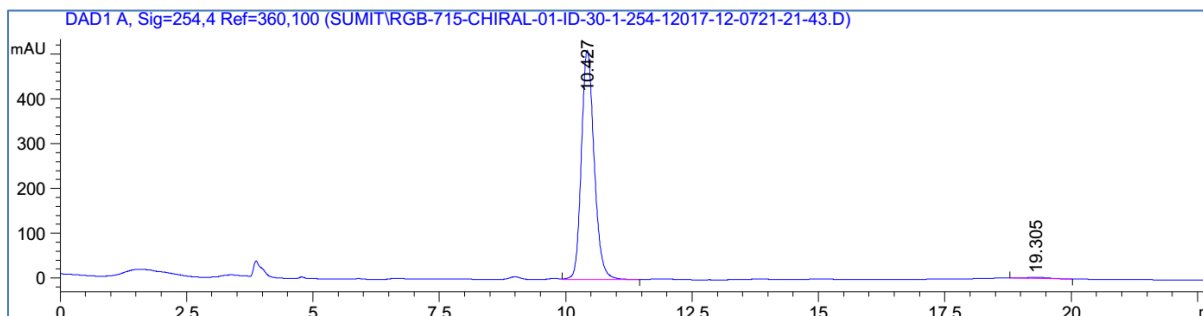

| Peak # | RetTime [min] | Type | Width [min] | Area [mAU*s] | Height [mAU] | Area %  |
|--------|---------------|------|-------------|--------------|--------------|---------|
| 1      | 10.427        | VB   | 0.2710      | 8994.06836   | 511.87506    | 99.1578 |
| 2      | 19.305        | BBA  | 0.5000      | 76.39089     | 2.35785      | 0.8422  |

Totals : 9070.45925 514.23291

HPLC chromatogram of enantioenriched **4ca**

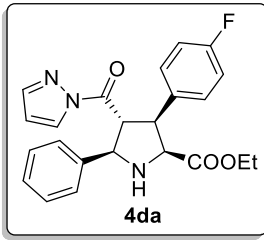

Sample Name: RGB-763-Rac-01-ID-30-1-All DADS

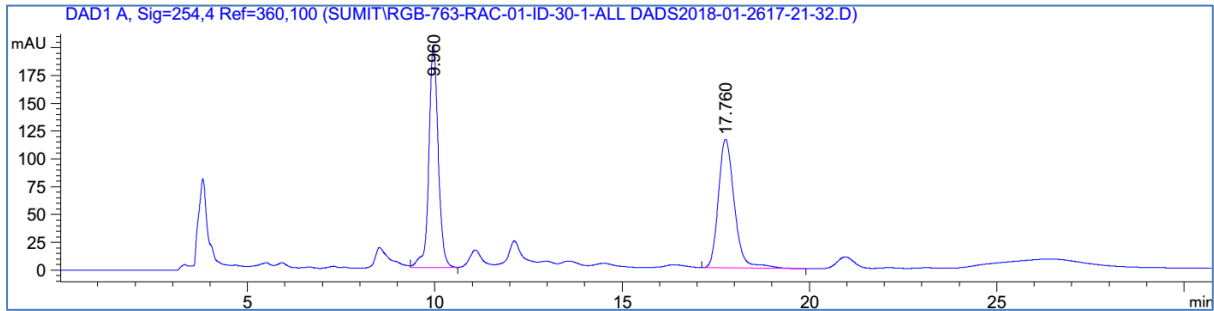

| Peak # | RetTime [min] | Type | Width [min] | Area [mAU*s] | Height [mAU] | Area %  |
|--------|---------------|------|-------------|--------------|--------------|---------|
| 1      | 9.960         | VB   | 0.2646      | 3476.53833   | 200.18739    | 50.2898 |
| 2      | 17.760        | BB   | 0.4566      | 3436.47217   | 115.67691    | 49.7102 |

Totals : 6913.01050 315.86430

HPLC chromatogram of racemic **4da**

Sample Name: RGB-764-Chiral-01-ID-30-1-All DADS

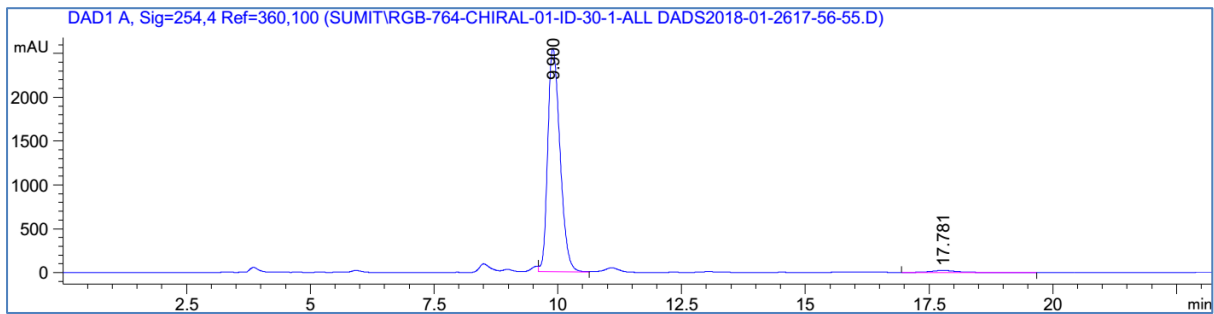

| Peak # | RetTime [min] | Type | Width [min] | Area [mAU*s] | Height [mAU] | Area %  |
|--------|---------------|------|-------------|--------------|--------------|---------|
| 1      | 9.900         | VV   | 0.2696      | 4.40283e4    | 2547.90869   | 97.9852 |
| 2      | 17.781        | BB   | 0.5646      | 905.32892    | 23.54441     | 2.0148  |

Totals : 4.49336e4 2571.45311

HPLC chromatogram of enantioenriched **4da**

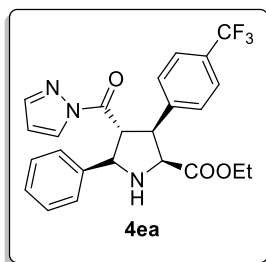

Sample Name: RGB-718-Rac-01-ID-30-1-254-1

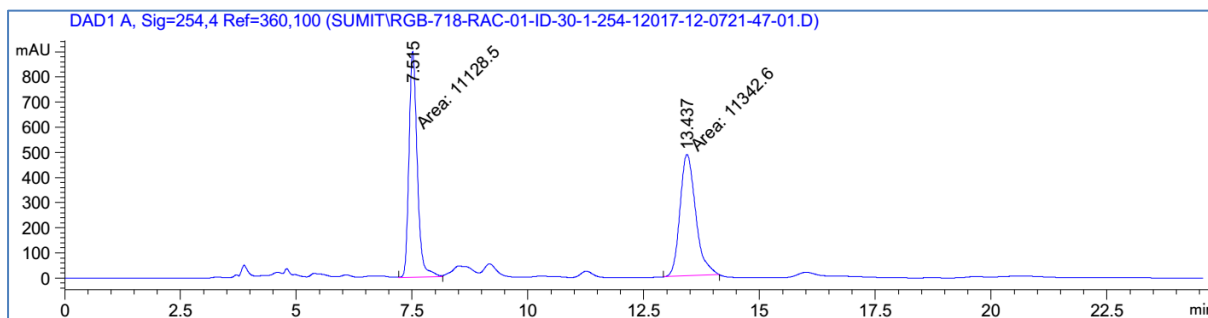

| Peak # | RetTime [min] | Type | Width [min] | Area [mAU*s] | Height [mAU] | Area %  |
|--------|---------------|------|-------------|--------------|--------------|---------|
| 1      | 7.515         | MM   | 0.2066      | 1.11285e4    | 897.56287    | 49.5237 |
| 2      | 13.437        | MM   | 0.3918      | 1.13426e4    | 482.55090    | 50.4763 |

Totals : 2.24711e4 1380.11377

HPLC chromatogram of racemic **4ea**

Sample Name: RGB-719-Chiral-01-ID-30-1-254-1

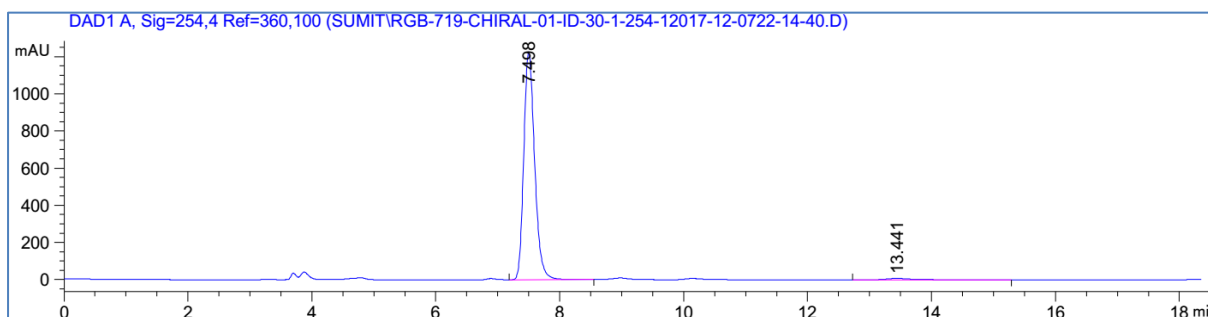

| Peak # | RetTime [min] | Type | Width [min] | Area [mAU*s] | Height [mAU] | Area %  |
|--------|---------------|------|-------------|--------------|--------------|---------|
| 1      | 7.498         | VB   | 0.1883      | 1.49448e4    | 1225.70117   | 98.4261 |
| 2      | 13.441        | BB   | 0.4365      | 238.98112    | 7.95469      | 1.5739  |

Totals : 1.51838e4 1233.65586

HPLC chromatogram of enantioenriched **4ea**

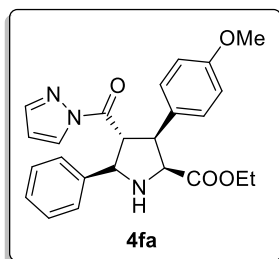

Sample Name: RGB-716-Rac-01-ID-30-1-254-1

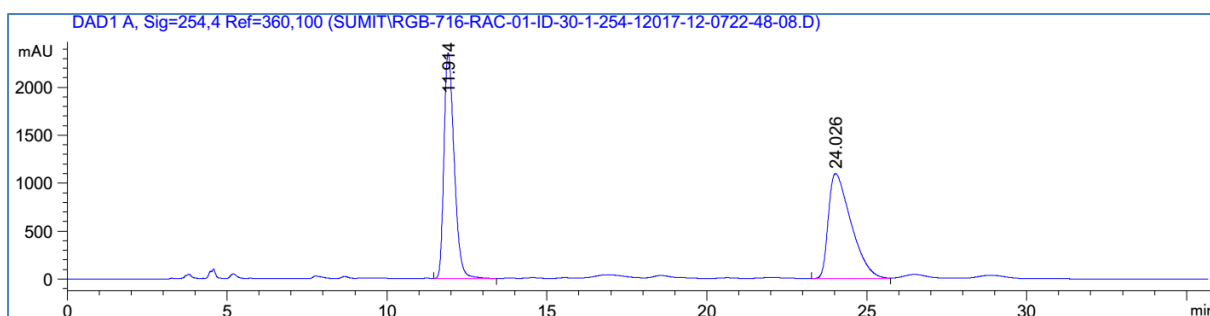

| Peak # | RetTime [min] | Type | Width [min] | Area [mAU*s] | Height [mAU] | Area %  |
|--------|---------------|------|-------------|--------------|--------------|---------|
| 1      | 11.914        | VB   | 0.3452      | 5.23235e4    | 2354.89380   | 49.2638 |
| 2      | 24.026        | BV   | 0.7442      | 5.38875e4    | 1094.90930   | 50.7362 |

Totals : 1.06211e5 3449.80310

HPLC chromatogram of racemic **4fa**

Sample Name: RGB-717-Chiral-01-ID-30-1-254-1

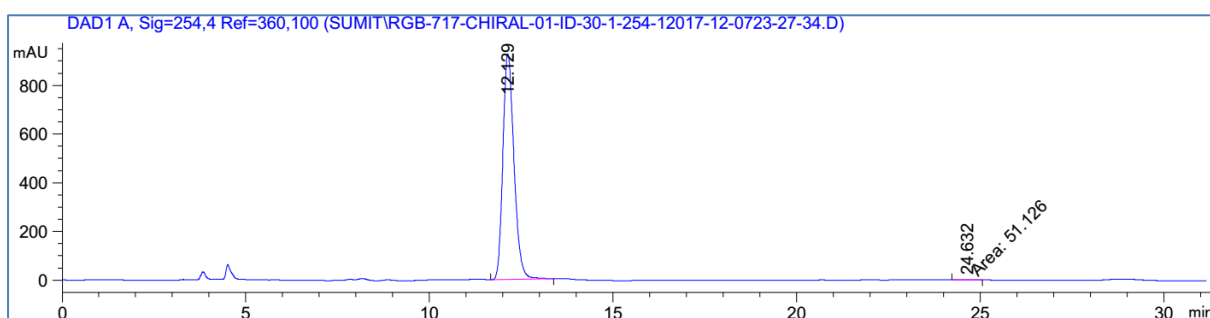

| Peak # | RetTime [min] | Type | Width [min] | Area [mAU*s] | Height [mAU] | Area %  |
|--------|---------------|------|-------------|--------------|--------------|---------|
| 1      | 12.129        | BB   | 0.3229      | 1.94481e4    | 926.48492    | 99.7378 |
| 2      | 24.632        | MM   | 0.5613      | 51.12603     | 1.51806      | 0.2622  |

Totals : 1.94992e4 928.00299

HPLC chromatogram of enantioenriched **4fa**

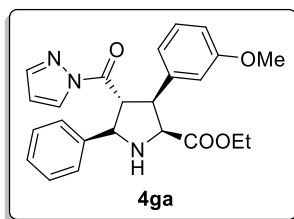

Sample Name: RGB-769-Rac-01-ID-40-1-All DADS

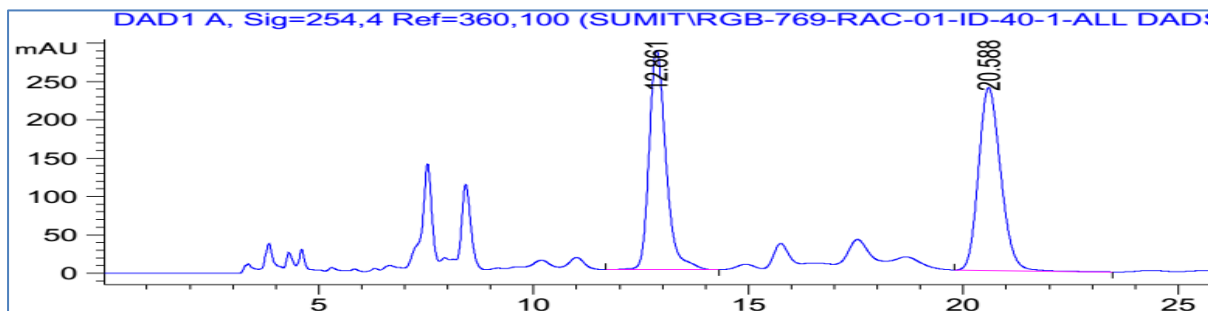

| Peak # | RetTime [min] | Type | Width [min] | Area [mAU*s] | Height [mAU] | Area %  |
|--------|---------------|------|-------------|--------------|--------------|---------|
| 1      | 12.861        | BB   | 0.4156      | 7782.02539   | 285.88452    | 47.6826 |
| 2      | 20.588        | BB   | 0.5560      | 8538.43066   | 238.31888    | 52.3174 |

Totals : 1.63205e4 524.20340

HPLC chromatogram of racemic **4ga**

Sample Name: RGB-770-Chiral-01-ID-40-1-All DADS

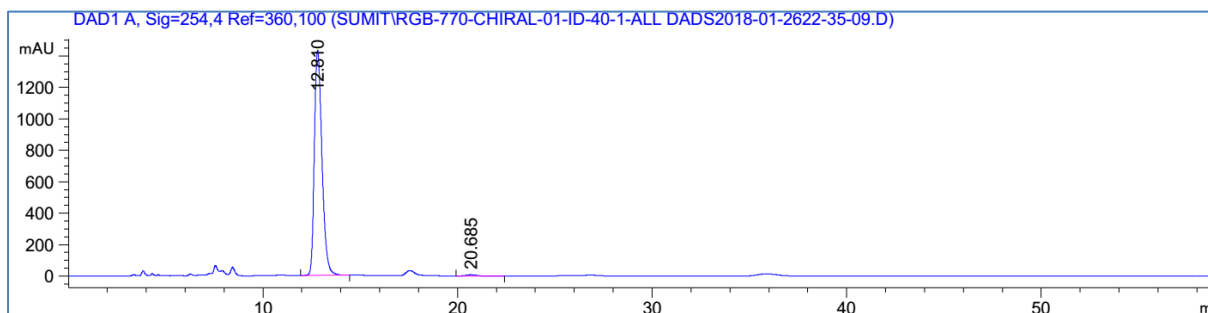

| Peak # | RetTime [min] | Type | Width [min] | Area [mAU*s] | Height [mAU] | Area %  |
|--------|---------------|------|-------------|--------------|--------------|---------|
| 1      | 12.810        | BB   | 0.4213      | 3.89910e4    | 1433.74976   | 99.1997 |
| 2      | 20.685        | BB   | 0.5786      | 314.54861    | 8.29107      | 0.8003  |

Totals : 3.93055e4 1442.04083

HPLC chromatogram of enantioenriched **4ga**

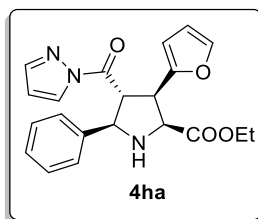

Sample Name: RGB-101011-RAC-ODH-30-1-254

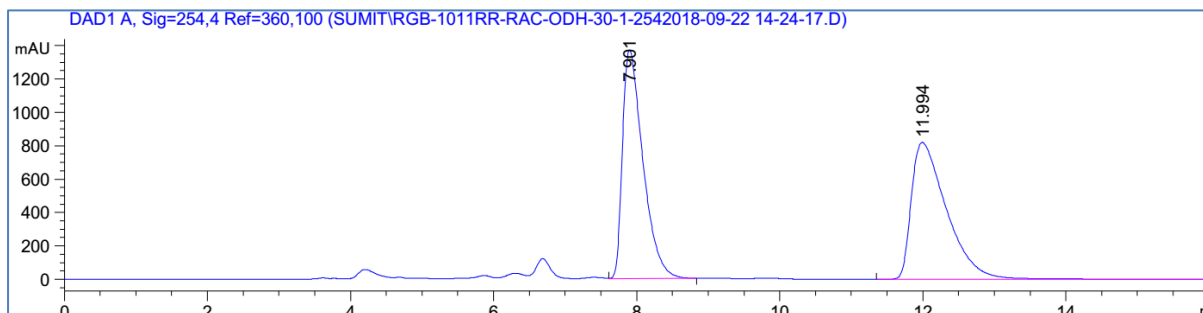

| Peak # | RetTime [min] | Type | Width [min] | Area [mAU*s] | Height [mAU] | Area %  |
|--------|---------------|------|-------------|--------------|--------------|---------|
| 1      | 7.901         | VB   | 0.3020      | 2.71930e4    | 1367.61487   | 49.2628 |
| 2      | 11.994        | BBA  | 0.5146      | 2.80069e4    | 819.67621    | 50.7372 |

Totals : 5.52000e4 2187.29108

HPLC chromatogram of racemic **4ha**

Sample Name: RGB-1012RR-01-CHIRAL-ODH-30-1-254

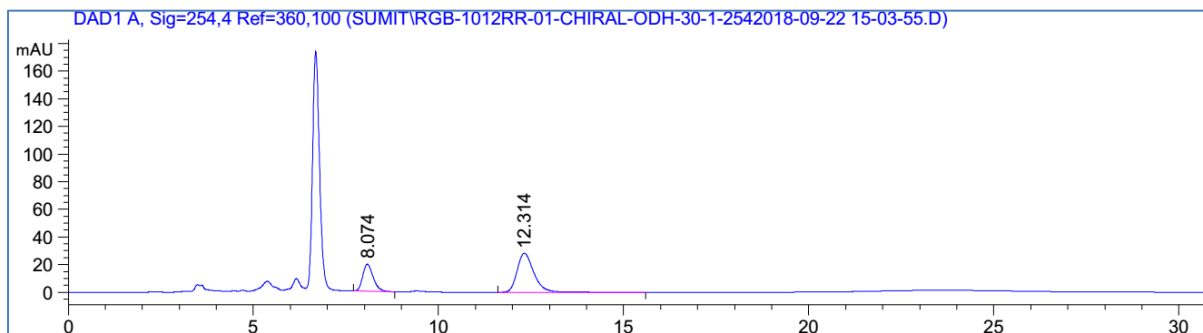

| Peak # | RetTime [min] | Type | Width [min] | Area [mAU*s] | Height [mAU] | Area %  |
|--------|---------------|------|-------------|--------------|--------------|---------|
| 1      | 8.074         | BB   | 0.2992      | 379.58481    | 19.49458     | 29.8797 |
| 2      | 12.314        | BB   | 0.4810      | 890.79254    | 28.31792     | 70.1203 |

Totals : 1270.37735 47.81250

HPLC chromatogram of enantioenriched **4ha**



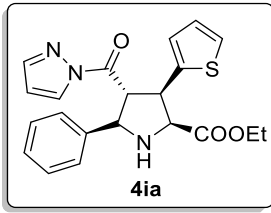

Sample Name: RGB-05316R-ADH-40-1-254-RAC-01

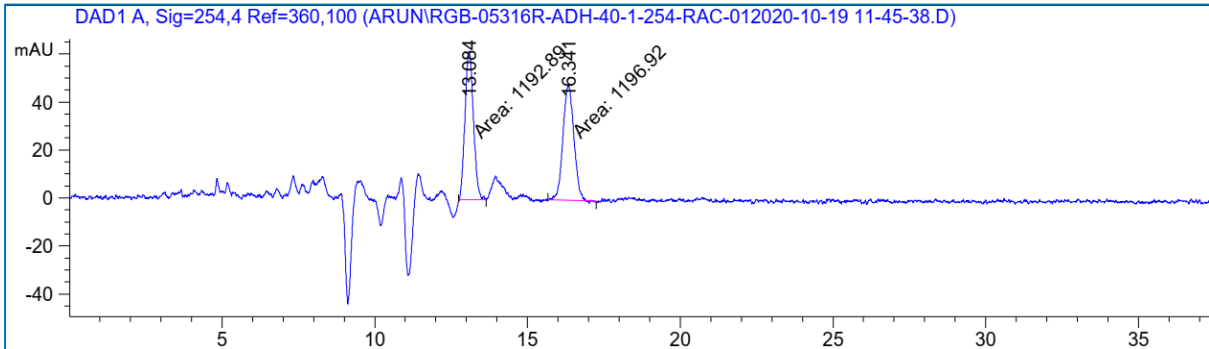

| Peak # | RetTime [min] | Type | Width [min] | Area [mAU*s] | Height [mAU] | Area %  |
|--------|---------------|------|-------------|--------------|--------------|---------|
| 1      | 13.084        | MM   | 0.3218      | 1192.88525   | 61.78625     | 49.9156 |
| 2      | 16.341        | MM   | 0.4140      | 1196.92065   | 48.18714     | 50.0844 |

Totals : 2389.80591 109.97338

HPLC chromatogram of racemic **4ia**

Sample Name: RGB-05317R-ADH-30-1-254-CHIRAL-01

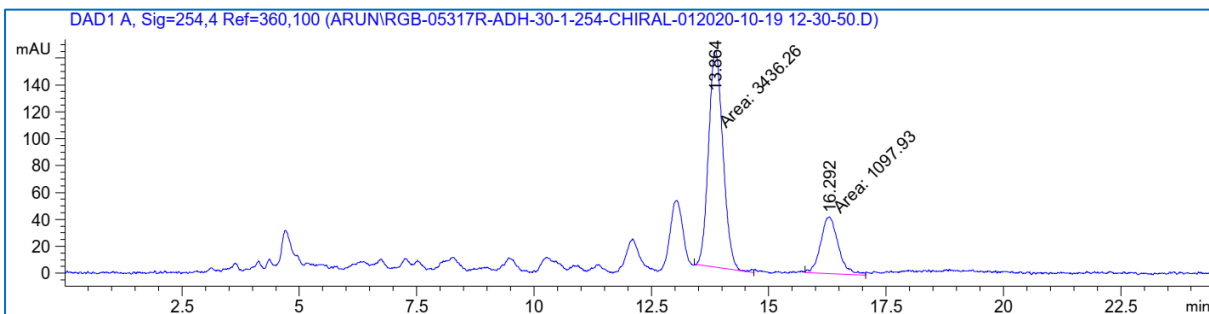

| Peak # | RetTime [min] | Type | Width [min] | Area [mAU*s] | Height [mAU] | Area %  |
|--------|---------------|------|-------------|--------------|--------------|---------|
| 1      | 13.864        | MM   | 0.3552      | 3436.26172   | 161.24118    | 75.7856 |
| 2      | 16.292        | MM   | 0.4352      | 1097.92761   | 42.04232     | 24.2144 |

Totals : 4534.18933 203.28350

HPLC chromatogram of enantioenriched **4ia**

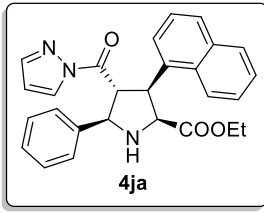

Sample Name: RGB-05314R-ADH-30-1-254-RAC

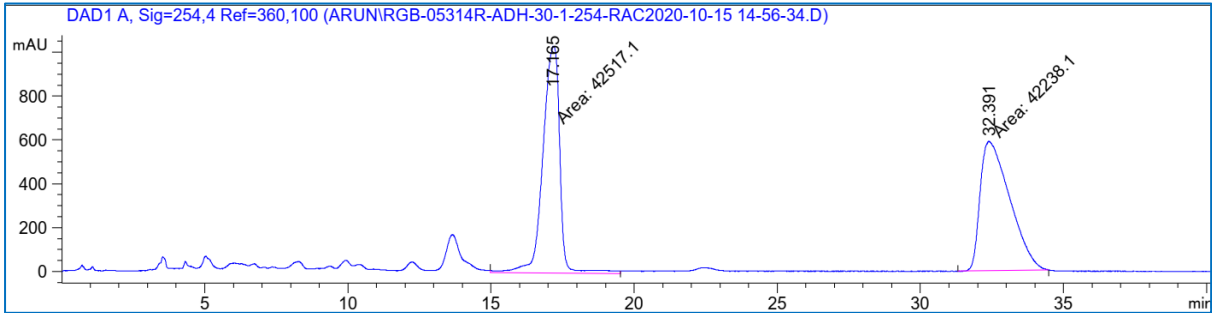

| Peak # | RetTime [min] | Type | Width [min] | Area [mAU*s] | Height [mAU] | Area %  |
|--------|---------------|------|-------------|--------------|--------------|---------|
| 1      | 17.165        | MM   | 0.6855      | 4.25171e4    | 1033.70703   | 50.1646 |
| 2      | 32.391        | MM   | 1.1928      | 4.22381e4    | 590.15851    | 49.8354 |

Totals : 8.47552e4 1623.86554

HPLC chromatogram of racemic **4ja**

Sample Name: RGB-05315R-ADH-30-1-254-CHIRAL

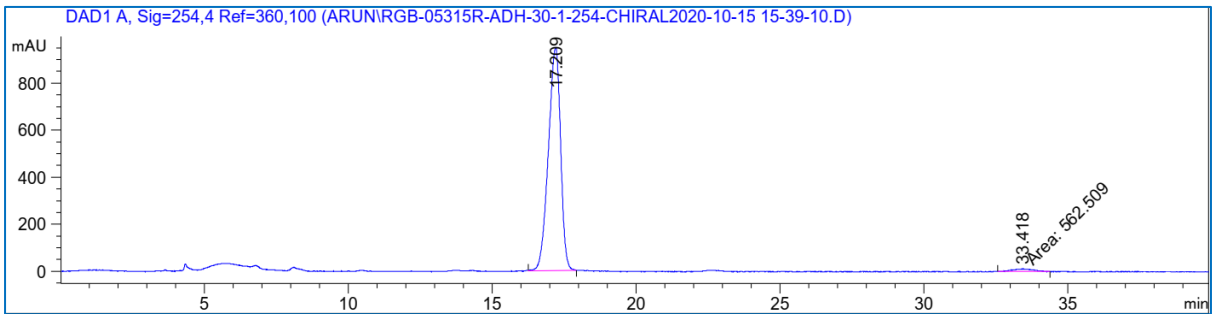

| Peak # | RetTime [min] | Type | Width [min] | Area [mAU*s] | Height [mAU] | Area %  |
|--------|---------------|------|-------------|--------------|--------------|---------|
| 1      | 17.209        | VV   | 0.3593      | 2.81136e4    | 949.91327    | 98.0384 |
| 2      | 33.418        | MM   | 0.8267      | 562.50867    | 11.34066     | 1.9616  |

Totals : 2.86761e4 961.25393

HPLC chromatogram of enantioenriched **4ja**

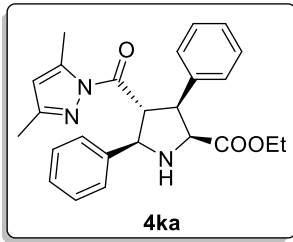

Sample Name: RGB-05378-ODH-30-1-ALL-RAC-01

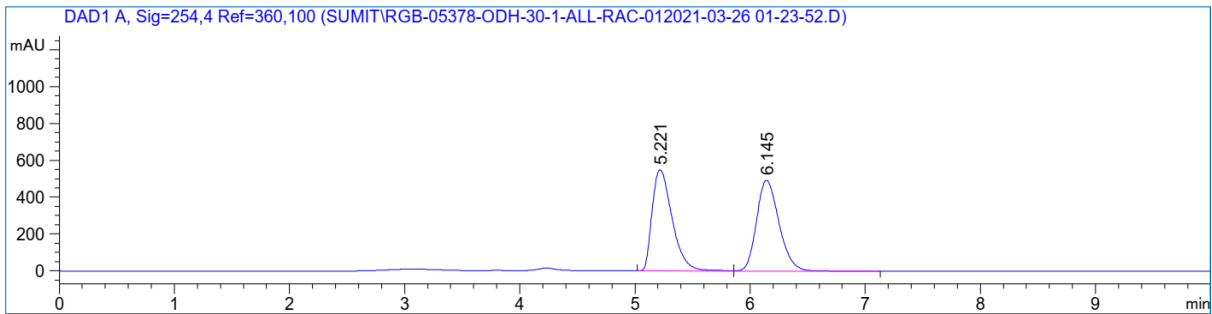

| Peak # | RetTime [min] | Type | Width [min] | Area [mAU*s] | Height [mAU] | Area %  |
|--------|---------------|------|-------------|--------------|--------------|---------|
| 1      | 5.221         | BV   | 0.1895      | 6662.24170   | 549.38660    | 49.8950 |
| 2      | 6.145         | VB   | 0.2103      | 6690.27539   | 493.15656    | 50.1050 |

Totals : 1.33525e4 1042.54315

HPLC chromatogram of racemic **4ka**

Sample Name: RGB-05379-ODH-30-1-ALL-CHIRAL

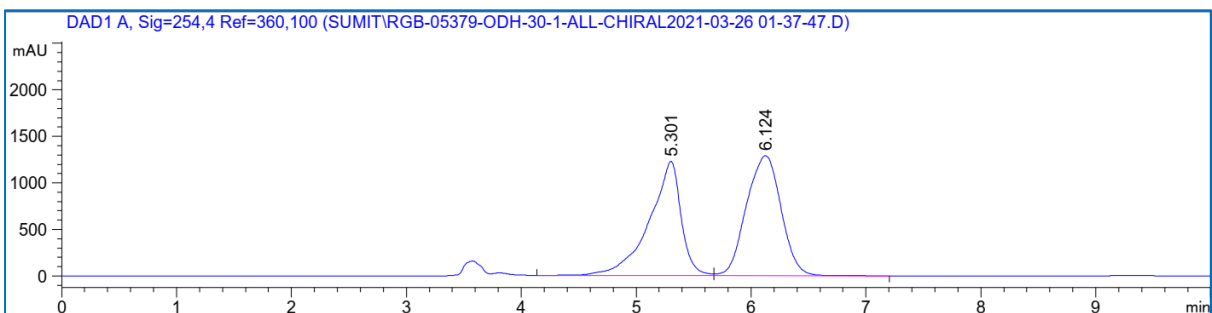

| Peak # | RetTime [min] | Type | Width [min] | Area [mAU*s] | Height [mAU] | Area %  |
|--------|---------------|------|-------------|--------------|--------------|---------|
| 1      | 5.301         | BV   | 0.2610      | 2.36801e4    | 1227.77466   | 46.7253 |
| 2      | 6.124         | VB   | 0.3423      | 2.69993e4    | 1289.10754   | 53.2747 |

Totals : 5.06794e4 2516.88220

HPLC chromatogram of enantioenriched **4ka**

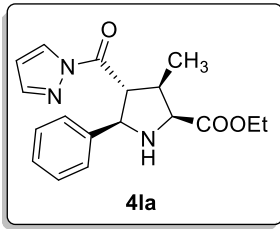

Sample Name: RGB-05382-ODH-15-1-254-RAC-02

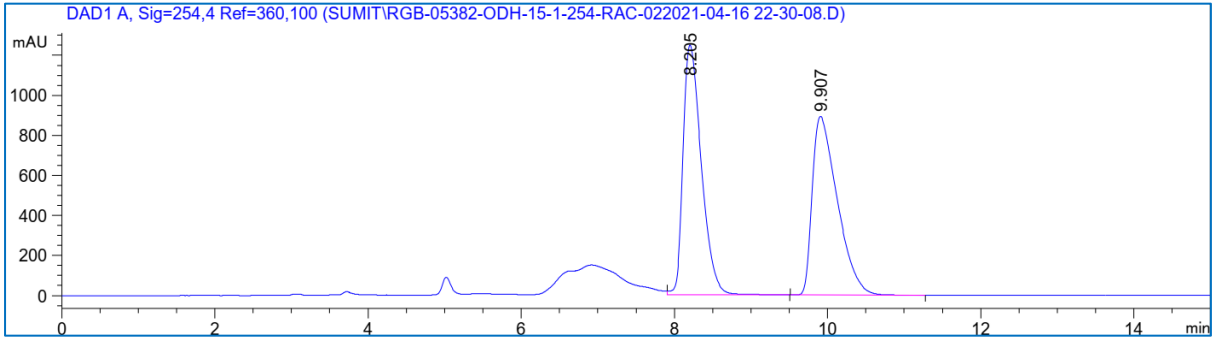

| Peak # | RetTime [min] | Type | Width [min] | Area [mAU*s] | Height [mAU] | Area %  |
|--------|---------------|------|-------------|--------------|--------------|---------|
| 1      | 8.205         | VB   | 0.2551      | 2.06365e4    | 1247.11975   | 50.5214 |
| 2      | 9.907         | BB   | 0.3444      | 2.02106e4    | 891.85541    | 49.4786 |

Totals : 4.08472e4 2138.97516

HPLC chromatogram of racemic **4la**

Sample Name: RGB-05383R-ODH-15-1-254-CHIRAL-02

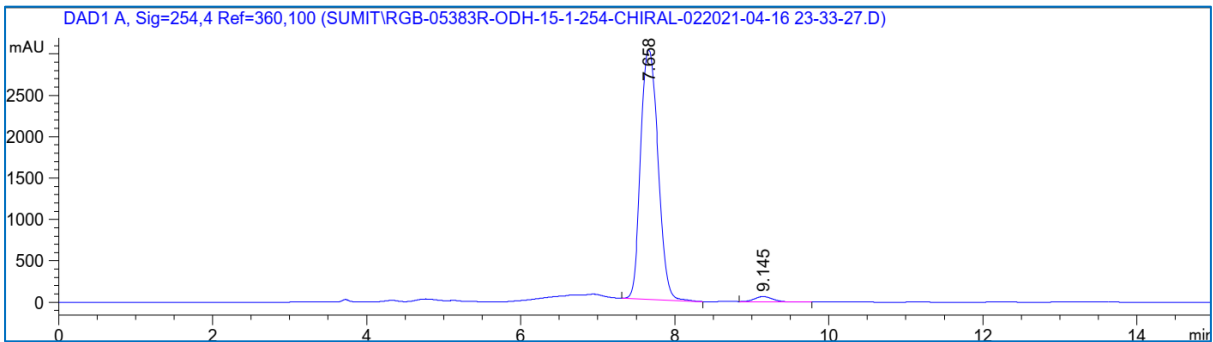

| Peak # | RetTime [min] | Type | Width [min] | Area [mAU*s] | Height [mAU] | Area %  |
|--------|---------------|------|-------------|--------------|--------------|---------|
| 1      | 7.658         | BB   | 0.2331      | 4.72384e4    | 3010.13818   | 97.7480 |
| 2      | 9.145         | VB   | 0.2578      | 1088.33325   | 64.86351     | 2.2520  |

Totals : 4.83267e4 3075.00169

HPLC chromatogram of enantioenriched **4la**

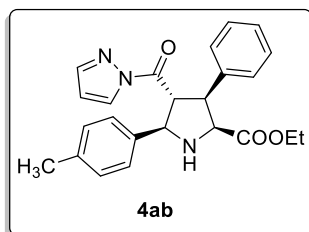

Sample Name: RGB-04-281-ADH-15-1-254-RAC-01

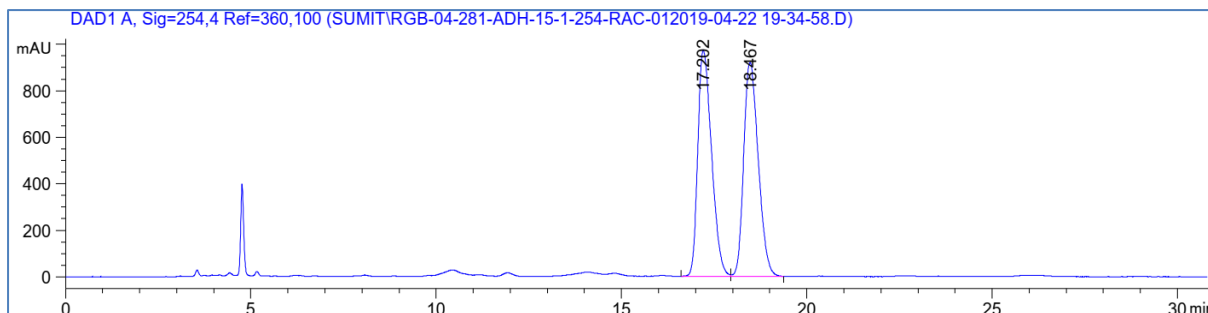

| Peak # | RetTime [min] | Type | Width [min] | Area [mAU*s] | Height [mAU] | Area %  |
|--------|---------------|------|-------------|--------------|--------------|---------|
| 1      | 17.202        | BV   | 0.3646      | 2.50872e4    | 973.68335    | 49.9541 |
| 2      | 18.467        | WV   | 0.4231      | 2.51333e4    | 918.84070    | 50.0459 |

Totals : 5.02206e4 1892.52405

HPLC chromatogram of racemic **4ab**

Sample Name: RGB-04-282R-ADH-15-1-254-CHIRAL

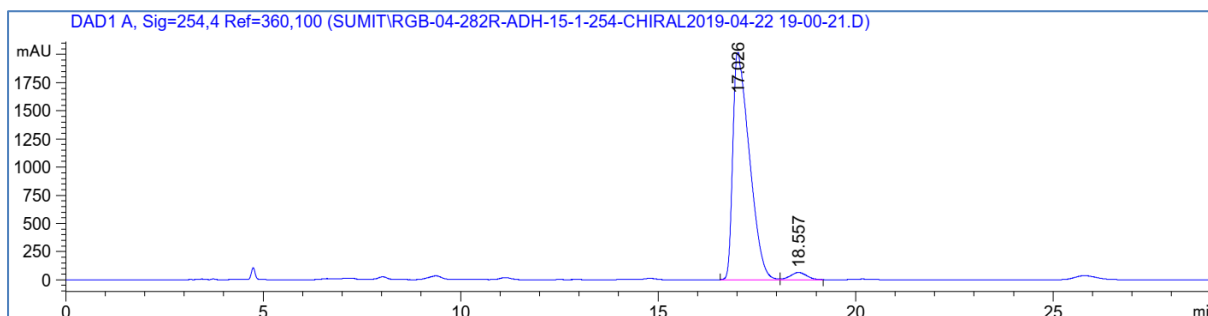

| Peak # | RetTime [min] | Type | Width [min] | Area [mAU*s] | Height [mAU] | Area %  |
|--------|---------------|------|-------------|--------------|--------------|---------|
| 1      | 17.026        | WV   | 0.3557      | 5.90412e4    | 2015.91211   | 96.9710 |
| 2      | 18.557        | WV   | 0.4142      | 1844.20813   | 63.99843     | 3.0290  |

Totals : 6.08854e4 2079.91054

HPLC chromatogram of enantioenriched **4ab**

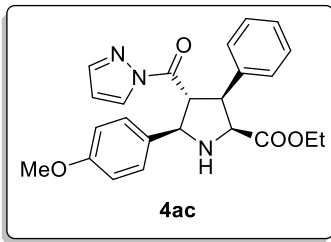

Sample Name: RGB-716-Rac-01-ID-30-1-254-1

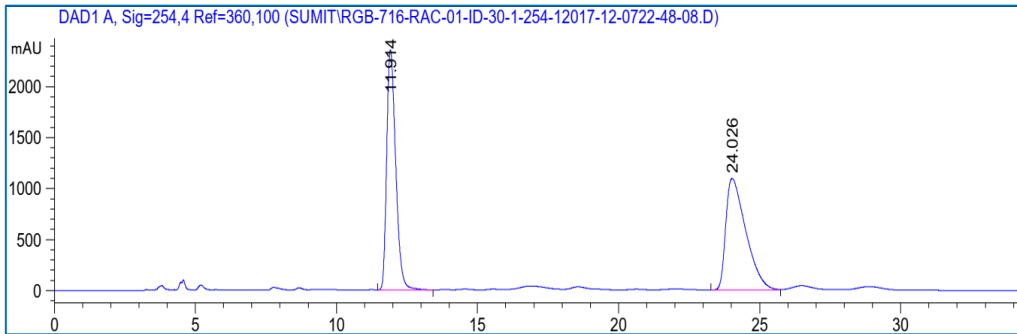

| Peak # | RetTime [min] | Type | Width [min] | Area [mAU*s] | Height [mAU] | Area %  |
|--------|---------------|------|-------------|--------------|--------------|---------|
| 1      | 11.914        | VB   | 0.3452      | 5.23235e4    | 2354.89380   | 49.2638 |
| 2      | 24.026        | BV   | 0.7442      | 5.38875e4    | 1094.90930   | 50.7362 |

Totals : 1.06211e5 3449.80310

HPLC chromatogram of racemic **4ac**

Sample Name: RGB-717-Chiral-01-ID-30-1-254-1

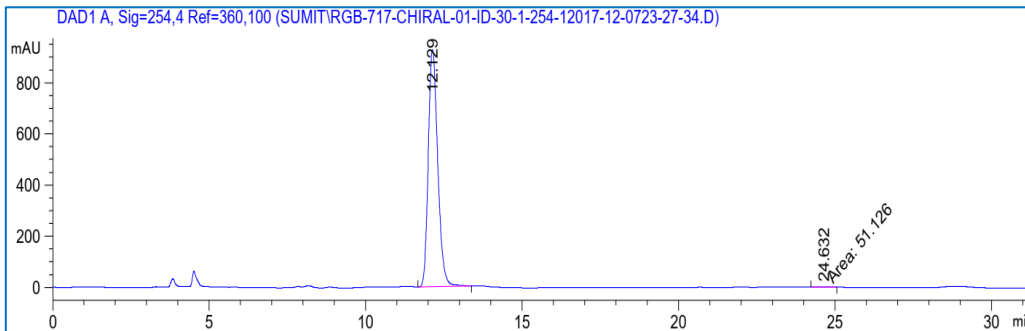

| Peak # | RetTime [min] | Type | Width [min] | Area [mAU*s] | Height [mAU] | Area %  |
|--------|---------------|------|-------------|--------------|--------------|---------|
| 1      | 12.129        | BB   | 0.3229      | 1.94481e4    | 926.48492    | 99.7378 |
| 2      | 24.632        | MM   | 0.5613      | 51.12603     | 1.51806      | 0.2622  |

Totals : 1.94992e4 928.00299

HPLC chromatogram of enantioenriched **4ac**

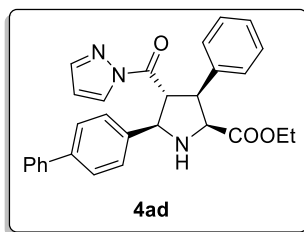

Sample Name: RGB-1038-RAC-ODH-30-1-ALL DADS

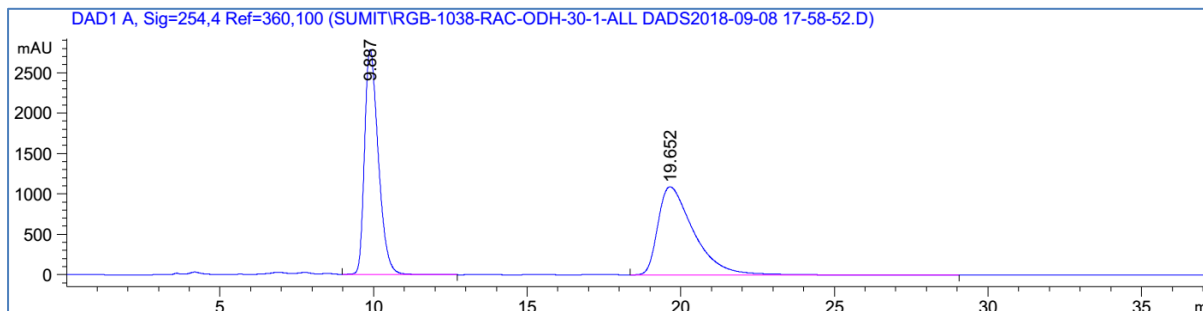

| Peak # | RetTime [min] | Type | Width [min] | Area [mAU*s] | Height [mAU] | Area %  |
|--------|---------------|------|-------------|--------------|--------------|---------|
| 1      | 9.887         | BB   | 0.4792      | 8.66547e4    | 2783.38159   | 49.6165 |
| 2      | 19.652        | BB   | 1.2076      | 8.79942e4    | 1090.32007   | 50.3835 |

Totals : 1.74649e5 3873.70166

HPLC chromatogram of racemic **4ad**

Sample Name: RGB-1039-CHIRAL-ODH-30-1-ALL DADS

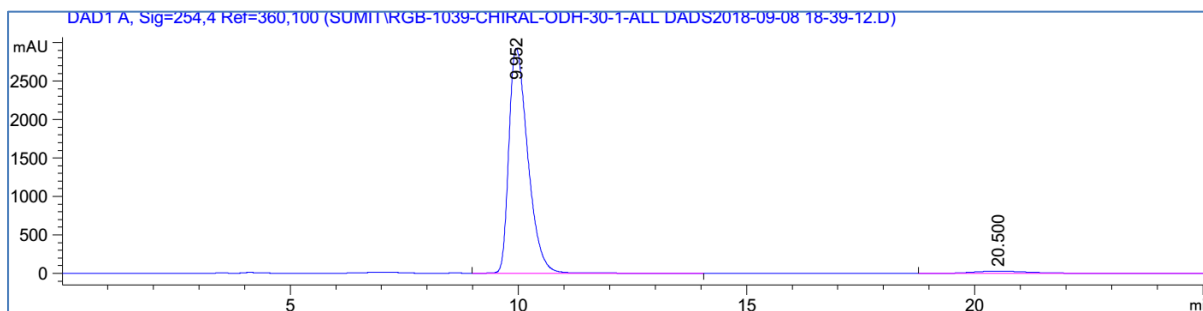

| Peak # | RetTime [min] | Type | Width [min] | Area [mAU*s] | Height [mAU] | Area %  |
|--------|---------------|------|-------------|--------------|--------------|---------|
| 1      | 9.952         | BB   | 0.4433      | 8.46024e4    | 2926.18433   | 96.9363 |
| 2      | 20.500        | BBA  | 1.3583      | 2673.86499   | 29.70217     | 3.0637  |

Totals : 8.72762e4 2955.88649

HPLC chromatogram of enantioenriched **4ad**

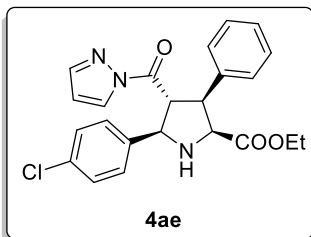

Sample Name: RGB-997-RAC-01-OD-H-30-1-ALL DAD-200M

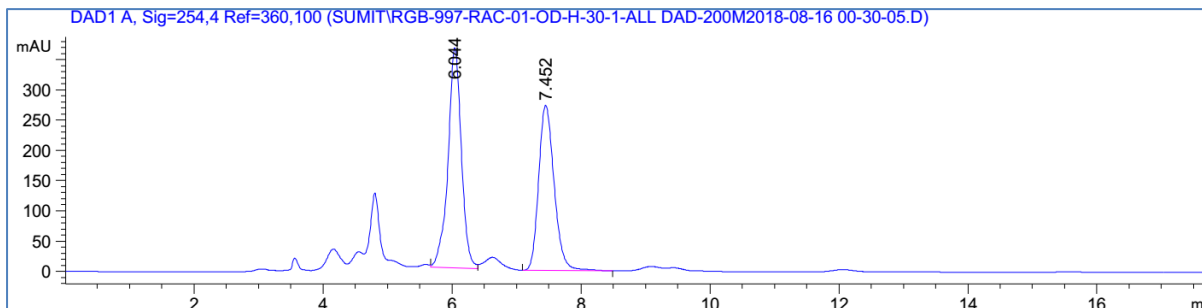

| Peak # | RetTime [min] | Type | Width [min] | Area [mAU*s] | Height [mAU] | Area %  |
|--------|---------------|------|-------------|--------------|--------------|---------|
| 1      | 6.044         | VV   | 0.2161      | 5250.00342   | 364.30060    | 53.5258 |
| 2      | 7.452         | BB   | 0.2569      | 4558.35010   | 272.85153    | 46.4742 |

Totals : 9808.35352 637.15213

HPLC chromatogram of racemic **4ae**

Sample Name: RGB-998-CHIRAL-01-OD-H-30-1-ALL DAD-200M

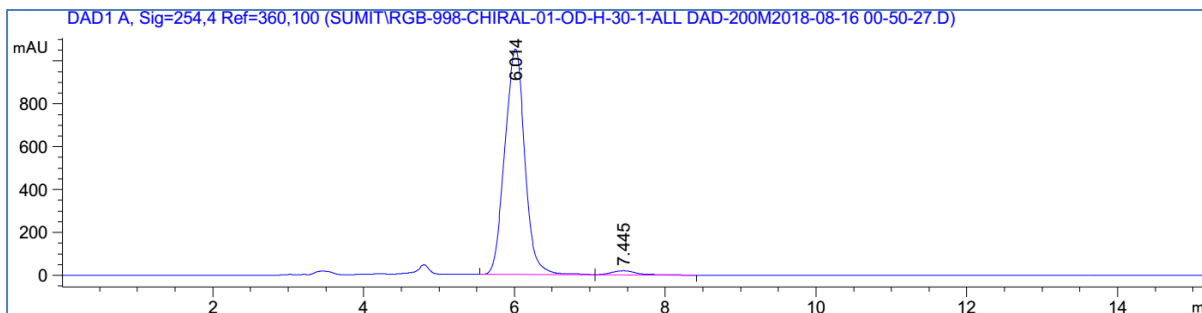

| Peak # | RetTime [min] | Type | Width [min] | Area [mAU*s] | Height [mAU] | Area %  |
|--------|---------------|------|-------------|--------------|--------------|---------|
| 1      | 6.014         | BV   | 0.2929      | 1.93831e4    | 1052.41187   | 97.6663 |
| 2      | 7.445         | VB   | 0.3617      | 463.14618    | 19.45841     | 2.3337  |

Totals : 1.98463e4 1071.87028

HPLC chromatogram of enantioenriched **4ae**



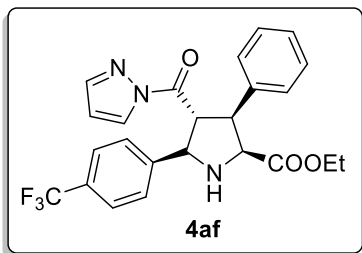

Sample Name: RGB-04-285-ADH-20-1-254-RAC-01

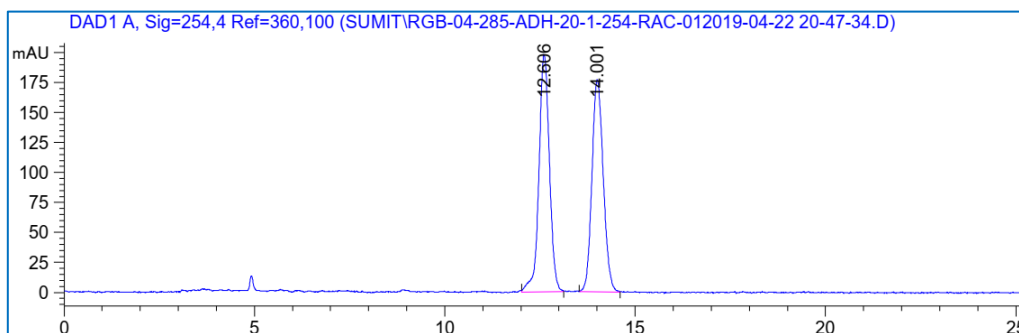

| Peak # | RetTime [min] | Type | Width [min] | Area [mAU*s] | Height [mAU] | Area %  |
|--------|---------------|------|-------------|--------------|--------------|---------|
| 1      | 12.606        | VV   | 0.2936      | 3788.91187   | 197.69821    | 50.7812 |
| 2      | 14.001        | VV   | 0.3222      | 3672.34009   | 176.89294    | 49.2188 |

Totals : 7461.25195 374.59116

HPLC chromatogram of racemic **4af**

Sample Name: RGB-04-286R-ADH-20-1-254-CHIRAL

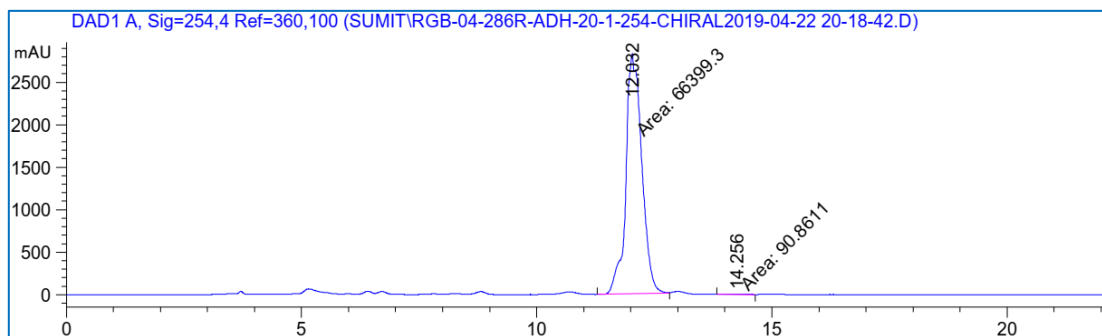

Signal 1: DAD1 A, Sig=254,4 Ref=360,100

| Peak # | RetTime [min] | Type | Width [min] | Area [mAU*s] | Height [mAU] | Area %  |
|--------|---------------|------|-------------|--------------|--------------|---------|
| 1      | 12.032        | MM   | 0.3919      | 6.63993e4    | 2823.61865   | 99.8633 |
| 2      | 14.256        | MM   | 0.3142      | 90.86106     | 4.81968      | 0.1367  |

Totals : 6.64901e4 2828.43833

HPLC chromatogram of enantioenriched **4af**

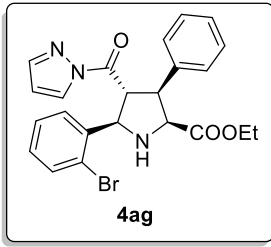

Sample Name: RGB-04-04-RAC-ADH-30-1-ALLDADS

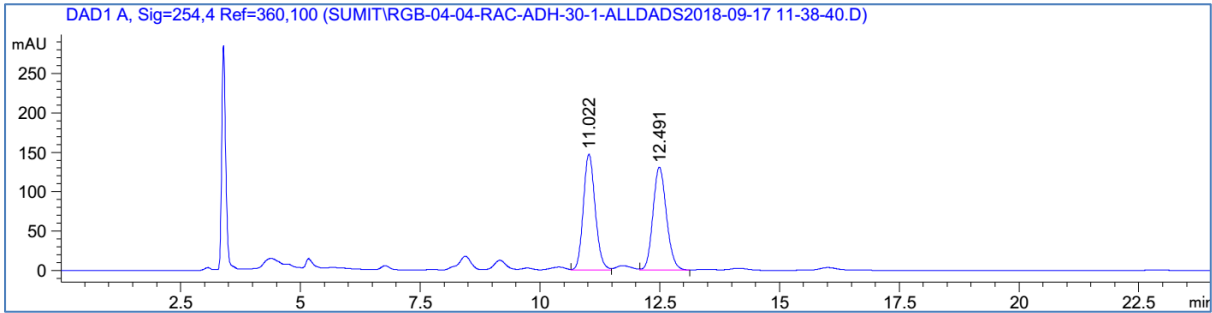

Signal 1: DAD1 A, Sig=254,4 Ref=360,100

| Peak # | RetTime [min] | Type | Width [min] | Area [mAU*s] | Height [mAU] | Area %  |
|--------|---------------|------|-------------|--------------|--------------|---------|
| 1      | 11.022        | VV   | 0.2668      | 2524.68188   | 146.68004    | 49.7760 |
| 2      | 12.491        | VB   | 0.3019      | 2547.40552   | 130.43153    | 50.2240 |

Totals : 5072.08740 277.11157

HPLC chromatogram of racemic **4ag**

Sample Name: RGB-04-05-CHIRAL-ADH-30-1-ALLDADS

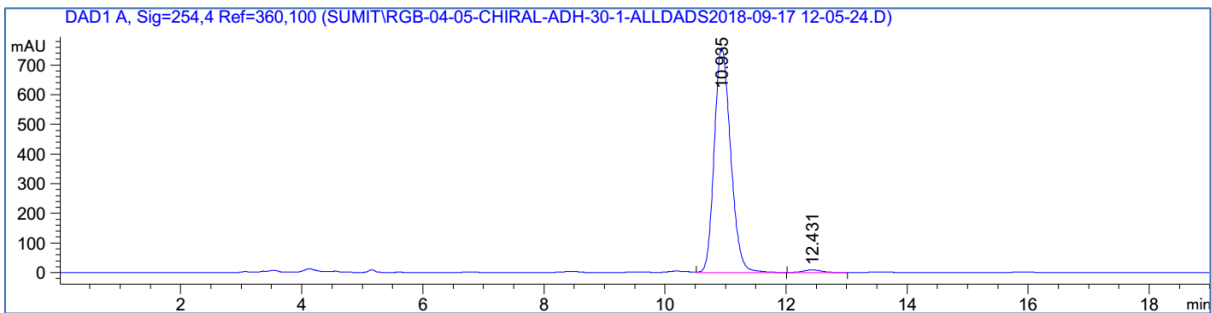

| Peak # | RetTime [min] | Type | Width [min] | Area [mAU*s] | Height [mAU] | Area %  |
|--------|---------------|------|-------------|--------------|--------------|---------|
| 1      | 10.935        | VB   | 0.2931      | 1.42278e4    | 757.59863    | 98.8045 |
| 2      | 12.431        | BB   | 0.3161      | 172.15559    | 8.50736      | 1.1955  |

Totals : 1.44000e4 766.10599

HPLC chromatogram of enantioenriched **4ag**

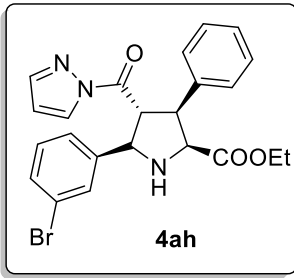

Sample Name: RGB-04-291R-ADH-20-1-254-RAC

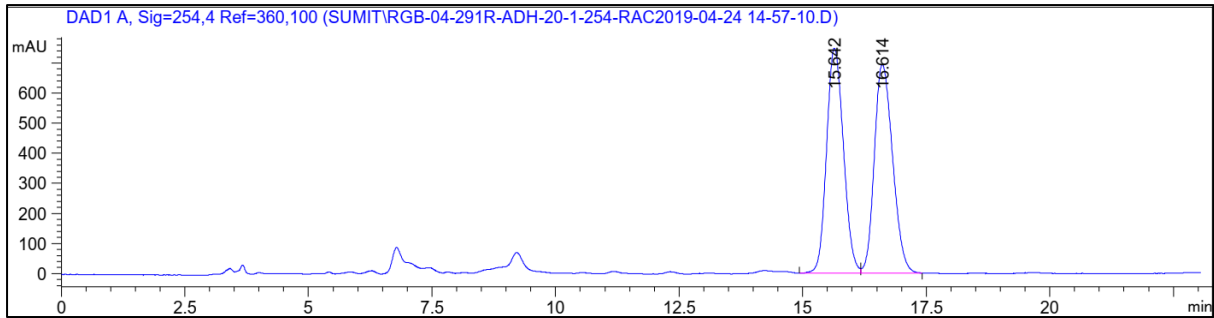

| Peak # | RetTime [min] | Type | Width [min] | Area [mAU*s] | Height [mAU] | Area %  |
|--------|---------------|------|-------------|--------------|--------------|---------|
| 1      | 15.642        | BV   | 0.3738      | 1.78045e4    | 747.83887    | 49.8340 |
| 2      | 16.614        | VV   | 0.4094      | 1.79232e4    | 693.82800    | 50.1660 |

Totals : 3.57277e4 1441.66687

HPLC chromatogram of racemic **4ah**

Sample Name: RGB-04-292R-ADH-20-1-254-CHIRAL

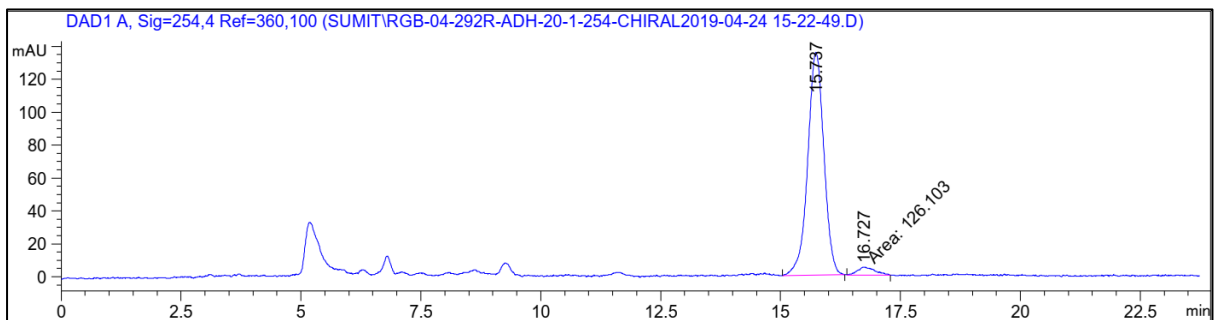

| Peak # | RetTime [min] | Type | Width [min] | Area [mAU*s] | Height [mAU] | Area %  |
|--------|---------------|------|-------------|--------------|--------------|---------|
| 1      | 15.737        | BB   | 0.3520      | 3182.90137   | 135.50673    | 96.1891 |
| 2      | 16.727        | MM   | 0.4285      | 126.10264    | 4.90444      | 3.8109  |

Totals : 3309.00401 140.41117

HPLC chromatogram of enantioenriched **4ah**

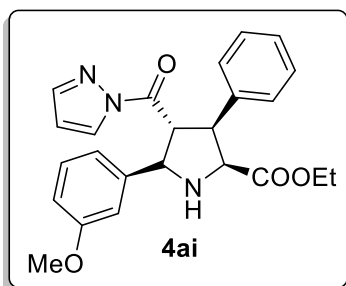

Sample Name: RGB-999-RAC-01-OD-H-30-1-ALL DAD-200M

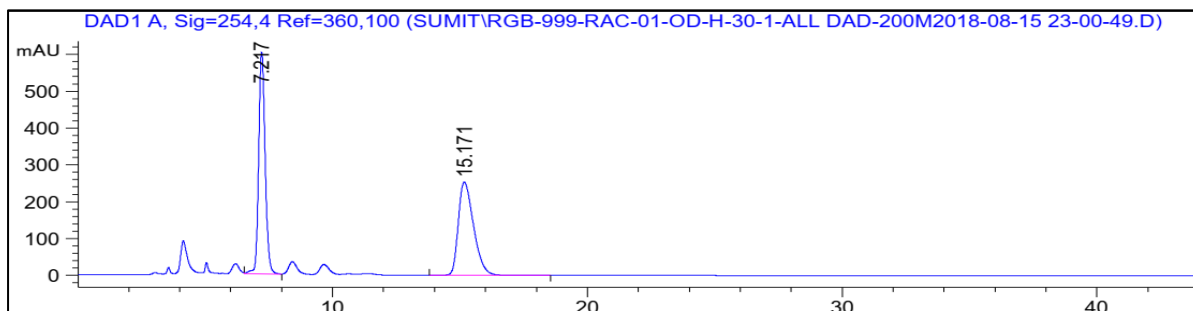

| Peak # | RetTime [min] | Type | Width [min] | Area [mAU*s] | Height [mAU] | Area %  |
|--------|---------------|------|-------------|--------------|--------------|---------|
| 1      | 7.217         | VB   | 0.2714      | 1.06057e4    | 602.40930    | 50.2322 |
| 2      | 15.171        | BB   | 0.6392      | 1.05076e4    | 253.70717    | 49.7678 |

Totals : 2.11133e4 856.11647

HPLC chromatogram of racemic **4ai**

Sample Name: RGB-1000-CHIRAL-01-OD-H-30-1-ALL DAD-200

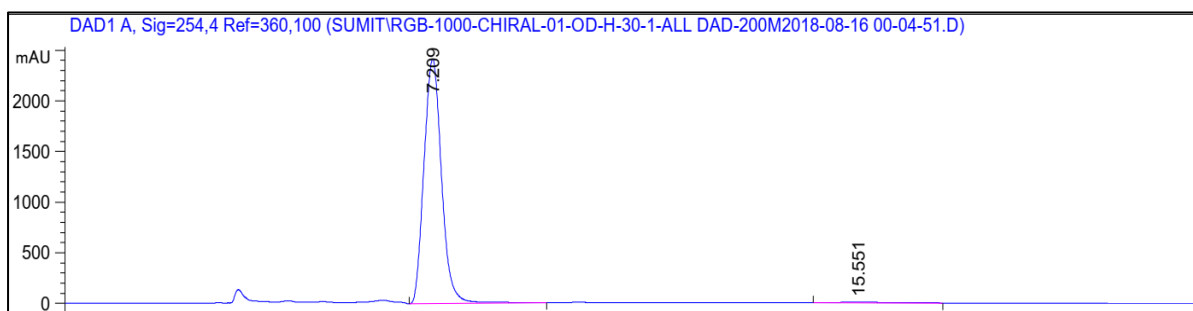

| Peak # | RetTime [min] | Type | Width [min] | Area [mAU*s] | Height [mAU] | Area %  |
|--------|---------------|------|-------------|--------------|--------------|---------|
| 1      | 7.209         | BB   | 0.3770      | 5.78007e4    | 2416.67603   | 99.2243 |
| 2      | 15.551        | BBA  | 0.6927      | 451.86224    | 10.08587     | 0.7757  |

Totals : 5.82525e4 2426.76190

HPLC chromatogram of enantioenriched **4ai**

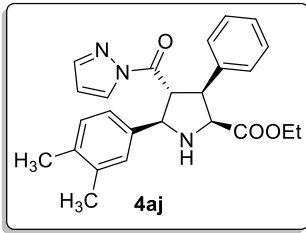

Sample Name: MMS-1090-ODH-05-1-254-RAC

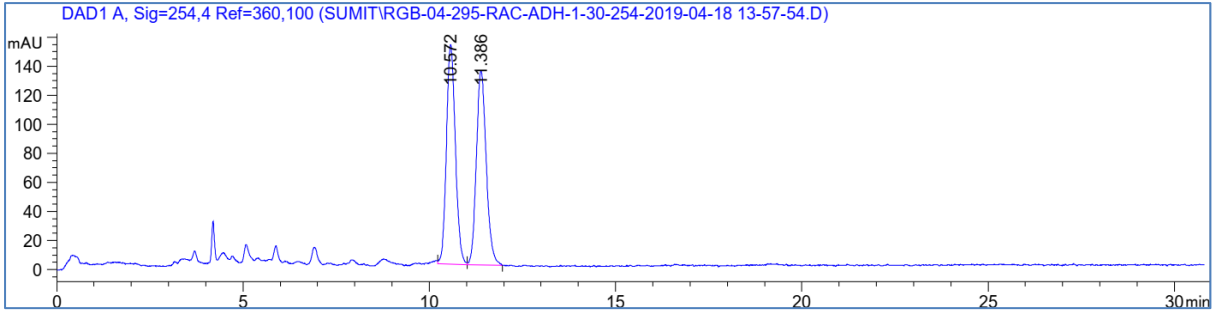

| Peak # | RetTime [min] | Type | Width [min] | Area [mAU*s] | Height [mAU] | Area %  |
|--------|---------------|------|-------------|--------------|--------------|---------|
| 1      | 10.572        | VV   | 0.2519      | 2512.89160   | 151.18719    | 50.4549 |
| 2      | 11.386        | VV   | 0.2815      | 2467.58252   | 133.58781    | 49.5451 |

Totals : 4980.47412 284.77501

HPLC chromatogram of racemic **4aj**

Sample Name: RGB-04-296-CHIRAL-ADH-1-30-254

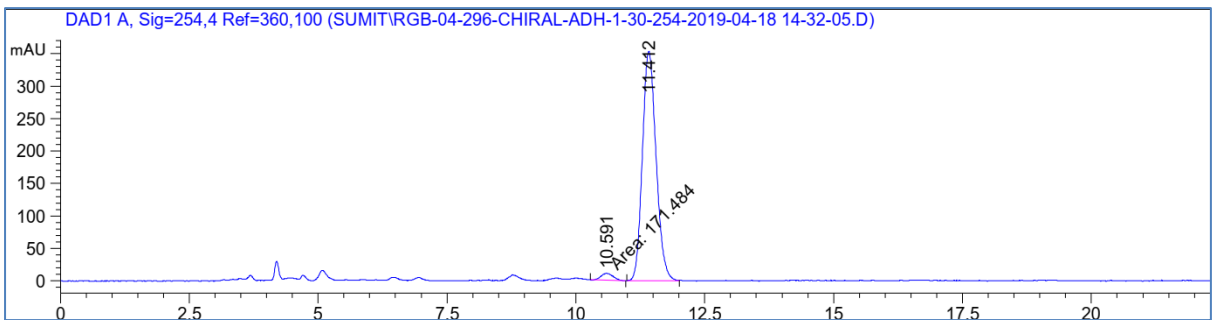

| Peak # | RetTime [min] | Type | Width [min] | Area [mAU*s] | Height [mAU] | Area %  |
|--------|---------------|------|-------------|--------------|--------------|---------|
| 1      | 10.591        | MM   | 0.2702      | 171.48396    | 10.57753     | 2.5551  |
| 2      | 11.412        | VV   | 0.2878      | 6539.94678   | 353.51096    | 97.4449 |

Totals : 6711.43074 364.08848

HPLC chromatogram of enantioenriched **4aj**

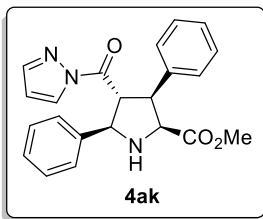

Sample Name: RGB-04-248-ADH-30-1-254-RAC

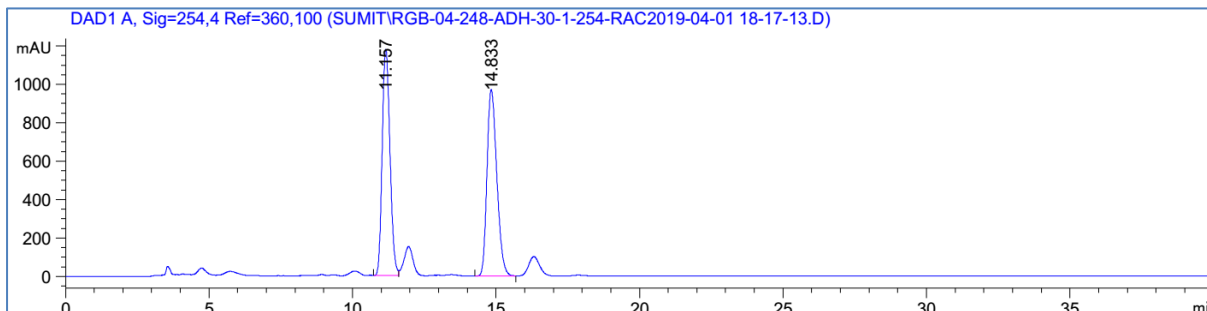

| Peak # | RetTime [min] | Type | Width [min] | Area [mAU*s] | Height [mAU] | Area %  |
|--------|---------------|------|-------------|--------------|--------------|---------|
| 1      | 11.157        | BV   | 0.2949      | 2.22693e4    | 1175.89355   | 49.0943 |
| 2      | 14.833        | VV   | 0.3655      | 2.30909e4    | 970.69214    | 50.9057 |

Totals : 4.53602e4 2146.58569

HPLC chromatogram of racemic **4ak**

Sample Name: RGB-04-249-ADH-30-1-254-CHIRAL

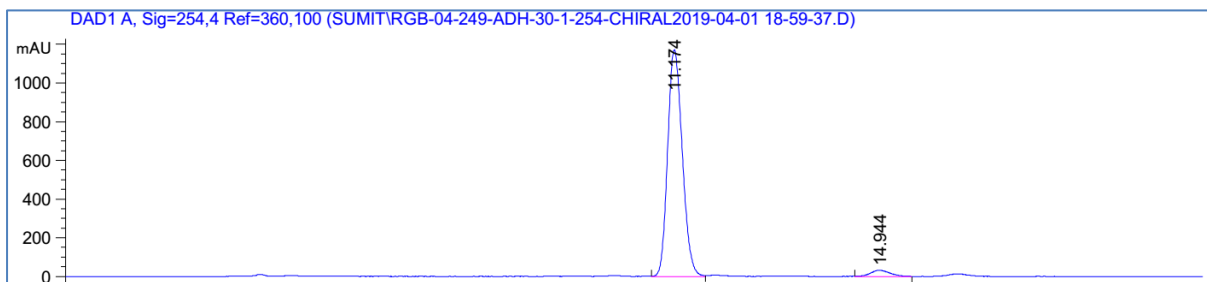

| Peak # | RetTime [min] | Type | Width [min] | Area [mAU*s] | Height [mAU] | Area %  |
|--------|---------------|------|-------------|--------------|--------------|---------|
| 1      | 11.174        | VV   | 0.2915      | 2.18301e4    | 1171.13110   | 96.4667 |
| 2      | 14.944        | VV   | 0.3032      | 799.57819    | 32.25920     | 3.5333  |

Totals : 2.26297e4 1203.39031

HPLC chromatogram of enantioenriched **4ak**

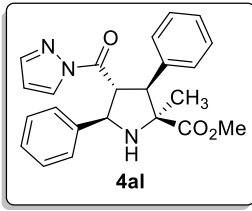

Sample Name: RGB-05390-ADH-30-1-254-ALL-RAC

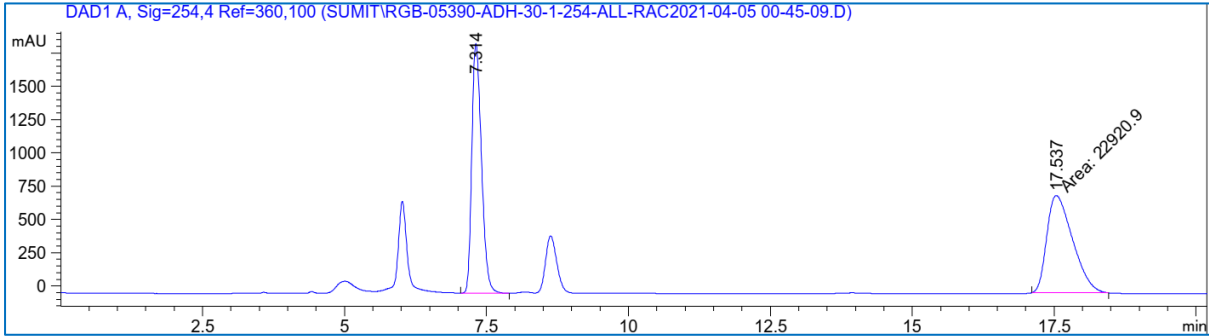

| Peak # | RetTime [min] | Type | Width [min] | Area [mAU*s] | Height [mAU] | Area %  |
|--------|---------------|------|-------------|--------------|--------------|---------|
| 1      | 7.314         | BB   | 0.1864      | 2.22208e4    | 1873.29346   | 49.2245 |
| 2      | 17.537        | MM   | 0.5241      | 2.29209e4    | 728.85791    | 50.7755 |

Totals : 4.51417e4 2602.15137

HPLC chromatogram of racemic **4al**

Sample Name: RGB-05391-ADH-30-1-254-ALL-CHIRAL-01

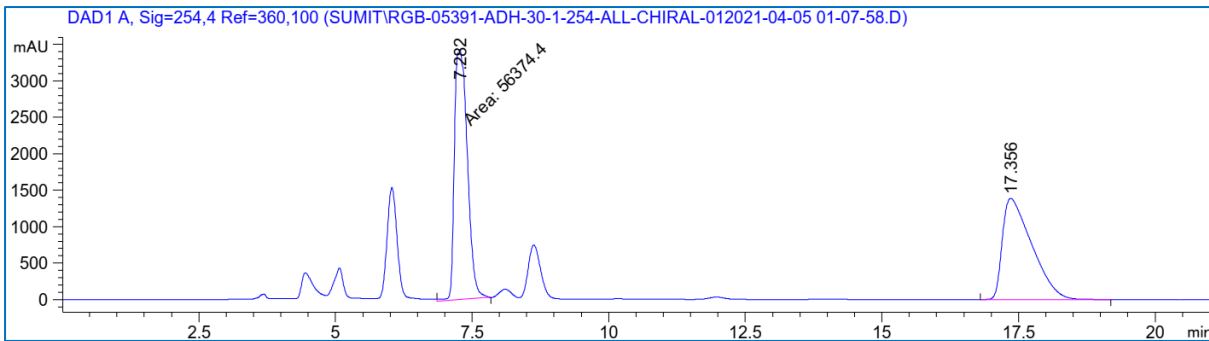

| Peak # | RetTime [min] | Type | Width [min] | Area [mAU*s] | Height [mAU] | Area %  |
|--------|---------------|------|-------------|--------------|--------------|---------|
| 1      | 7.282         | MM   | 0.2737      | 5.63744e4    | 3433.28027   | 52.1112 |
| 2      | 17.356        | BB   | 0.5238      | 5.18065e4    | 1386.88477   | 47.8888 |

Totals : 1.08181e5 4820.16504

HPLC chromatogram of enantioenriched **4al**

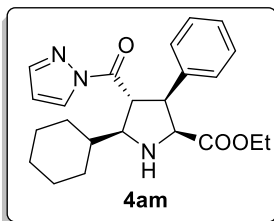

Sample Name: RGB-05376-ADH-30-1-ALL-RAC-01

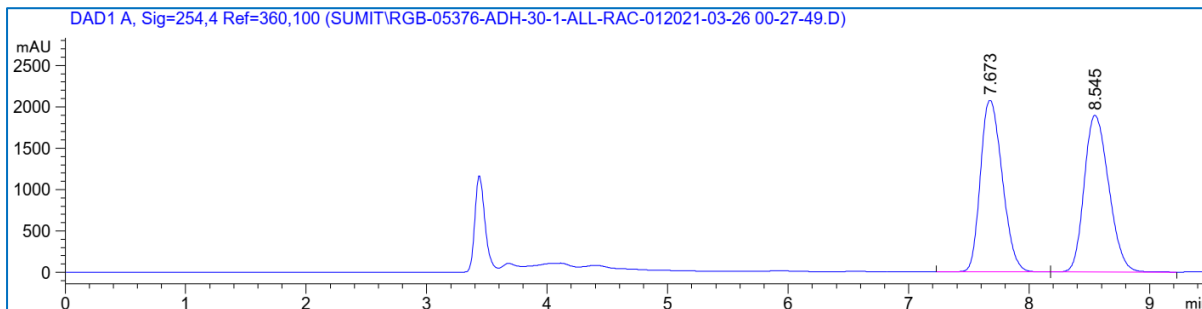

| Peak # | RetTime [min] | Type | Width [min] | Area [mAU*s] | Height [mAU] | Area %  |
|--------|---------------|------|-------------|--------------|--------------|---------|
| 1      | 7.673         | VB   | 0.2008      | 2.61759e4    | 2079.66064   | 49.4174 |
| 2      | 8.545         | BB   | 0.2228      | 2.67932e4    | 1896.49402   | 50.5826 |

Totals : 5.29691e4 3976.15466

HPLC chromatogram of racemic **4am**

Sample Name: RGB-05377-ADH-30-1-ALL-CHIRAL

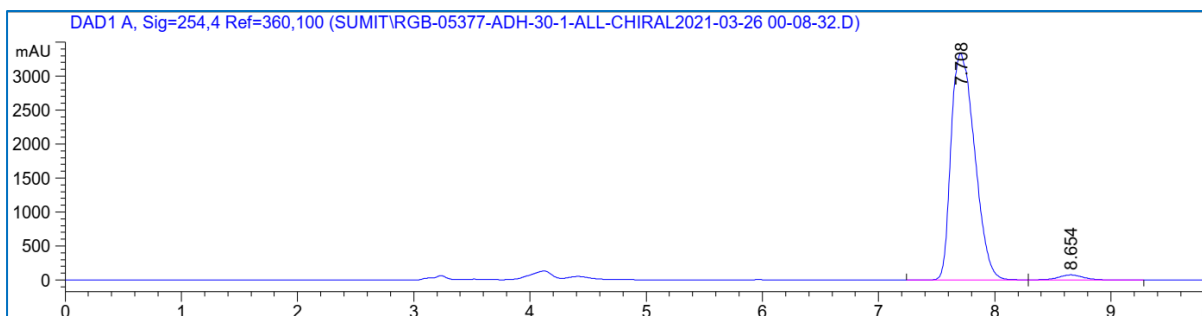

| Peak # | RetTime [min] | Type | Width [min] | Area [mAU*s] | Height [mAU] | Area %  |
|--------|---------------|------|-------------|--------------|--------------|---------|
| 1      | 7.708         | BV   | 0.1985      | 4.70510e4    | 3336.92432   | 97.6857 |
| 2      | 8.654         | VB   | 0.2264      | 1114.68689   | 74.55148     | 2.3143  |

Totals : 4.81657e4 3411.47579

HPLC chromatogram of enantioenriched **4am**



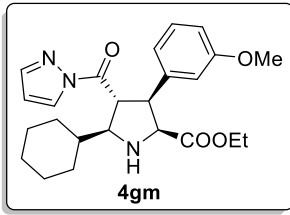

Sample Name: RGB-05388-IC-20-1-254-ALL-RAC

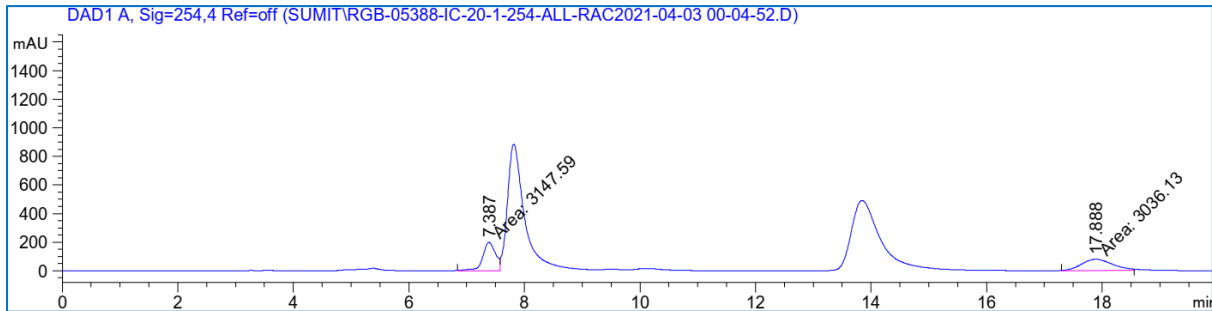

| Peak # | RetTime [min] | Type | Width [min] | Area [mAU*s] | Height [mAU] | Area %  |
|--------|---------------|------|-------------|--------------|--------------|---------|
| 1      | 7.387         | MF   | 0.2647      | 3147.59351   | 198.17479    | 50.9013 |
| 2      | 17.888        | MM   | 0.6331      | 3036.12598   | 79.93145     | 49.0987 |

Totals : 6183.71948 278.10624

HPLC chromatogram of racemic **4gm**

Sample Name: RGB-05389-IC-20-1-254-ALL-CHIRAL

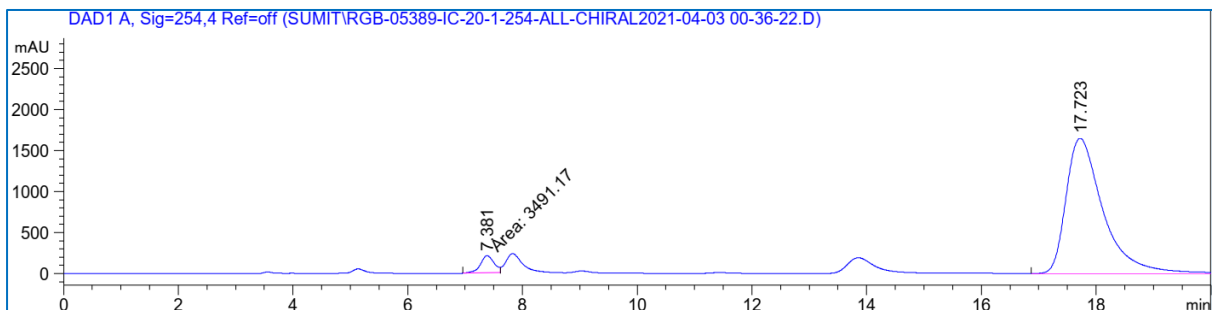

| Peak # | RetTime [min] | Type | Width [min] | Area [mAU*s] | Height [mAU] | Area %  |
|--------|---------------|------|-------------|--------------|--------------|---------|
| 1      | 7.381         | MF   | 0.2752      | 3491.16504   | 211.41292    | 4.4861  |
| 2      | 17.723        | BB   | 0.6736      | 7.43306e4    | 1649.99048   | 95.5139 |

Totals : 7.78217e4 1861.40340

HPLC chromatogram of enantioenriched **4gm**

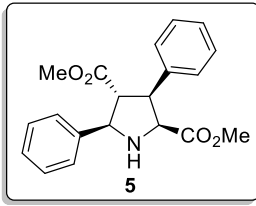

Sample Name: RAU-44 B-ODH-ALLDAD-40-1-254-RAC

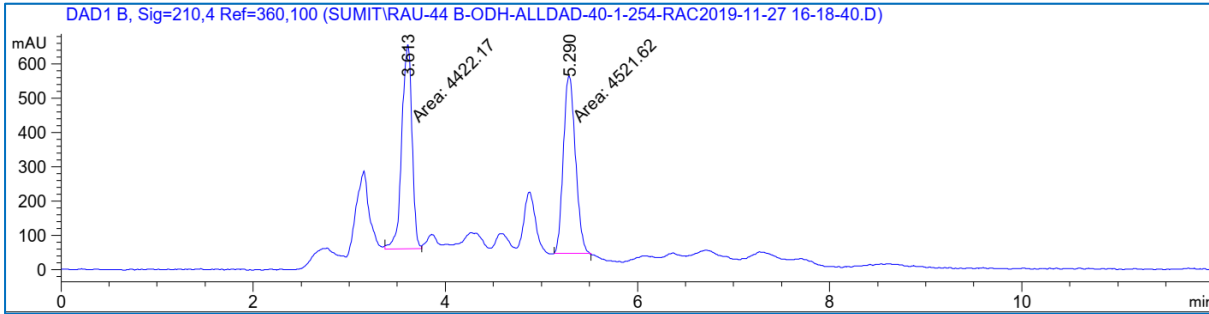

| Peak # | RetTime [min] | Type | Width [min] | Area [mAU*s] | Height [mAU] | Area %  |
|--------|---------------|------|-------------|--------------|--------------|---------|
| 1      | 3.613         | MM   | 0.1235      | 4422.17480   | 596.82648    | 49.4440 |
| 2      | 5.290         | MM   | 0.1456      | 4521.62451   | 517.67181    | 50.5560 |

Totals : 8943.79932 1114.49829

HPLC Chromatogram of racemic 5

Sample Name: RAU-41-ODH-ALLDAD-40-1-254-CHIRAL

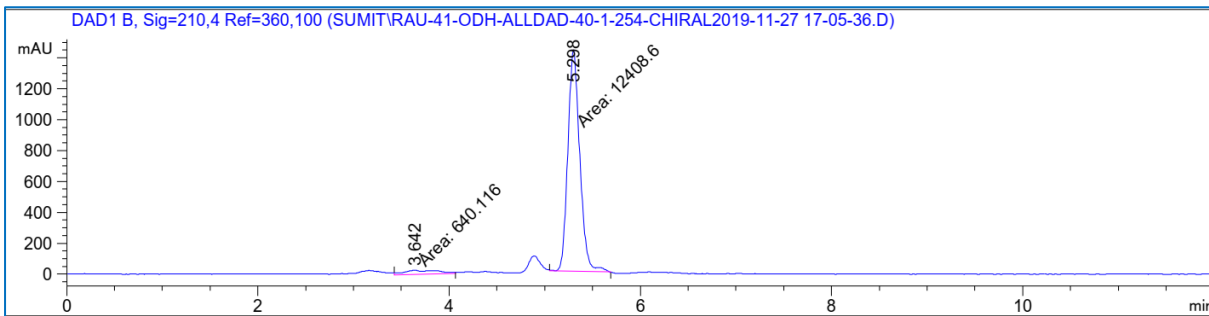

| Peak # | RetTime [min] | Type | Width [min] | Area [mAU*s] | Height [mAU] | Area %  |
|--------|---------------|------|-------------|--------------|--------------|---------|
| 1      | 3.642         | MM   | 0.4053      | 640.11560    | 26.32108     | 4.9056  |
| 2      | 5.298         | MM   | 0.1446      | 1.24086e4    | 1430.54504   | 95.0944 |

Totals : 1.30487e4 1456.86612

HPLC Chromatogram of enantioenriched 5

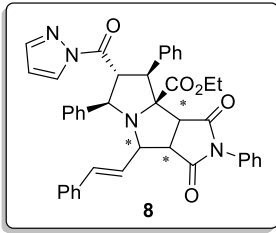

Sample Name: RGB-05384-ADH-40-1-254-RAC-1

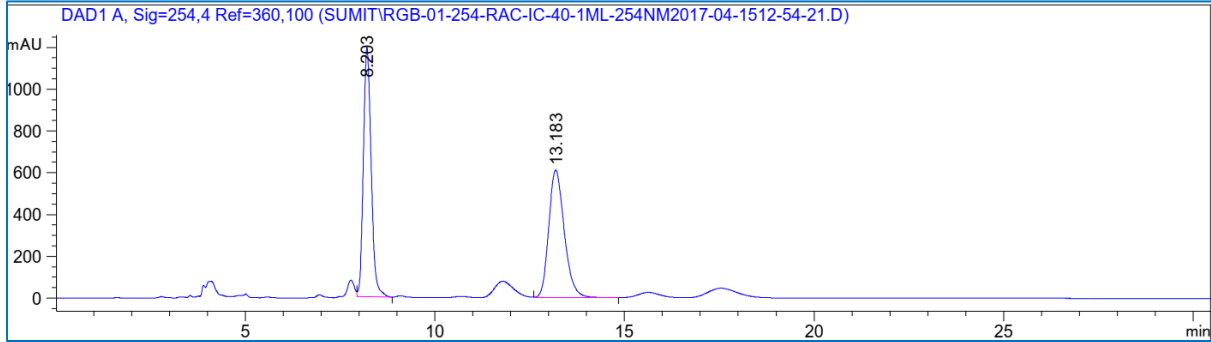

| Peak # | RetTime [min] | Type | Width [min] | Area [mAU*s] | Height [mAU] | Area %  |
|--------|---------------|------|-------------|--------------|--------------|---------|
| 1      | 8.203         | VV   | 0.2210      | 1.70936e4    | 1194.22229   | 49.5228 |
| 2      | 13.183        | VB   | 0.4389      | 1.74231e4    | 610.68768    | 50.4772 |

Totals : 3.45167e4 1804.90997

HPLC Chromatogram of racemic **8**

Sample Name: RGB-05384C-ADH-40-1-ALL-CHIRAL-06

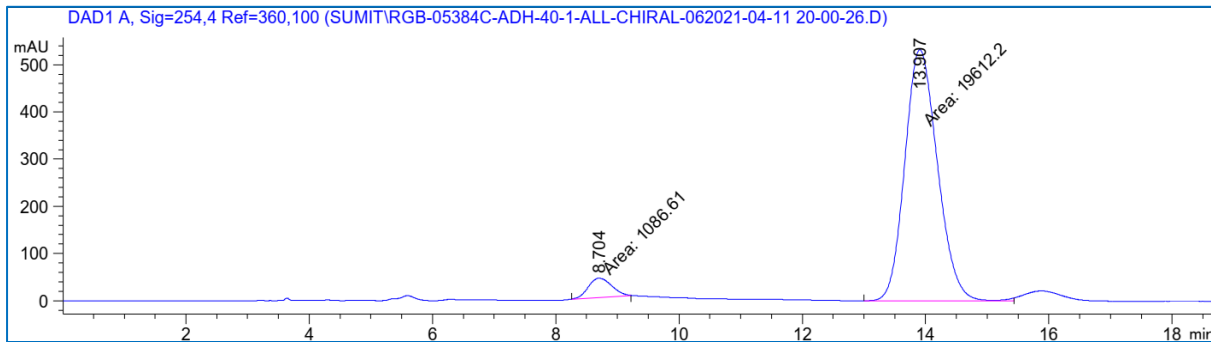

| Peak # | RetTime [min] | Type | Width [min] | Area [mAU*s] | Height [mAU] | Area %  |
|--------|---------------|------|-------------|--------------|--------------|---------|
| 1      | 8.704         | MM   | 0.4415      | 1086.61475   | 41.01876     | 5.2497  |
| 2      | 13.907        | MM   | 0.6141      | 1.96122e4    | 532.25256    | 94.7503 |

Totals : 2.06988e4 573.27132

HPLC Chromatogram of enantioenriched **8**
